# Supplementary material for: Palladium-catalyzed asymmetric [4 + 3] cycloaddition of acyclic α,β-unsaturated imines with trimethylenemethane donors: access to chiral non-fused azepines
Source: Royal Society of Chemistry journal article supplement (doi:10.1039/d4qo00064a), 2024-01-01
Supplement: d4qo00064a1.pdf [file d4qo00064a1.pdf]

## Supporting Information

### Palladium-catalyzed asymmetric [4 + 3] cycloaddition of acyclic $\alpha,\beta$ -unsaturated imines with trimethylenemethane donors: access to chiral non-fused azepines

Ting-Peng Li,<sup>a</sup> Shuixiu Su,<sup>a</sup> Jia-Huan Shen,<sup>b</sup> Meng Zang,<sup>b</sup> Yang-Zi Liu,<sup>a</sup> Quannan Wang,<sup>\*a</sup> and Wei-Ping Deng<sup>\*a,b</sup>

<sup>a</sup> Key Laboratory of the Ministry of Education for Advanced Catalysis Materials, College of Chemistry and Materials Science, Zhejiang Normal University, Jinhua, 321004 China.

<sup>b</sup> Shanghai Frontiers Science Center of Optogenetic Techniques for Cell Metabolism, School of Pharmacy, East China University of Science and Technology, 130 Meilong Road, Shanghai 200237, P. R. China.  
E-mail: wqn1991@zjnu.edu.cn, dengwp827@zjnu.edu.cn.

## Contents

|                                                             |    |
|-------------------------------------------------------------|----|
| 1. General information                                      | 2  |
| 2. General procedure for the asymmetric [4+3] cycloaddition | 3  |
| 3. Gram-scale preparation of compound 3a                    | 12 |
| 4. The X-Ray crystal structure                              | 13 |
| 5. References                                               | 14 |
| 6. <sup>1</sup> H NMR and <sup>13</sup> C NMR spectra       | 15 |
| 7. HPLC chromatograms                                       | 36 |

## 1. General information

$^1\text{H}$  NMR spectra were recorded on a Bruker DPX 400 MHz or Bruker Ascend 600 MHz spectrometer in  $\text{CDCl}_3$ . Chemical shifts were reported in ppm with the internal TMS signal at 0.0 ppm as a standard. The spectra are interpreted as: s = singlet, d = doublet, t = triplet, q = quartet, m = multiplet, dd = doublet of doublets, td = triplet of doublets, dt = doublet of triplets, ddd = doublet of doublet of doublets, ddt = doublet of doublet of triplets, dtd = doublet of triplet of doublets, brs = broad singlet, coupling constant (s)  $J$  are reported in Hz and relative integrations are reported.  $^{13}\text{C}$  NMR spectra were recorded on a Bruker DPX 400 MHz or Bruker Ascend 600 MHz spectrometer in  $\text{CDCl}_3$ . Chemical shifts were reported in ppm with the internal chloroform signal at 77.16 ppm as a standard.  $^{19}\text{F}$  NMR spectra were recorded on a Bruker Ascend 600 MHz spectrometer in  $\text{CDCl}_3$  and referenced relative to  $\text{CFCl}_3$ . Enantiomeric excesses were determined by analysis of HPLC traces, obtained by using Chiralpak IC column with *n*-hexane and *i*-propanol as solvents. (Chiralpak IC column was purchased from Daicel. *n*-hexane and *i*-propanol were purchased from Energy.) Melting points were obtained in open capillary tubes using SGW X-4 micro melting point apparatus which were uncorrected. High-resolution mass spectra (HRMS) were recorded on a Waters GCT Premier mass spectrometer using EI-TOF (electron ionization-time of flight) or on a JEOL AccuTOF LC-plus 4G mass spectrometer using ESI (electrospray ionization). Commercially available materials were used as received. Anhydrous  $\text{CH}_2\text{Cl}_2$  was distilled from calcium hydride, anhydrous THF and toluene was distilled from sodium/benzophenone.  $\alpha,\beta$ -Unsaturated imines **1**<sup>1</sup> and trimethylenemethane (TMM) donors **2**<sup>2</sup> were prepared according to the literature procedure.

## 2. General procedure for the synthesis of products 3

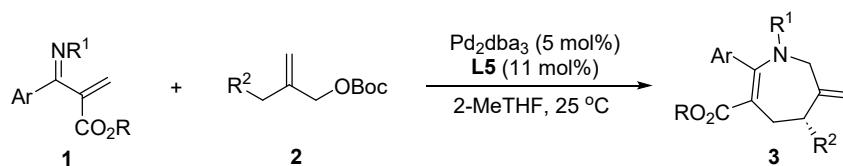

**General procedure A:** To a flame-dried and N<sub>2</sub>-purged Schlenk tube was added ligand **L5** (10.8 mg, 0.022 mmol, 11 mol%), and Pd<sub>2</sub>(dba)<sub>3</sub> (9.2 mg, 0.01 mmol, 5 mol%) and anhydrous 2-MeTHF (2.0 mL). The resulting solution was stirred for 0.5 h at room temperature. Then the reaction tube was moved to 0 °C. After 5 minutes,  $\alpha,\beta$ -unsaturated imine **1** (0.2 mmol, 1.0 equiv) and trimethylenemethane (TMM) donor **2** (0.3 mmol, 1.5 equiv) was added sequentially. The resulting solution was stirred vigorously at 0 °C. Once starting material was consumed (monitored by TLC), the mixture was concentrated and purified by column chromatography (PE/EA/DCM = 6:1:1) to give the corresponding product **3**.

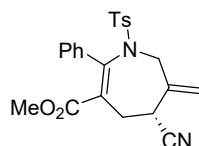

**Methyl (*R*)-5-cyano-6-methylene-2-phenyl-1-tosyl-4,5,6,7-tetrahydro-1*H*-azepine-3-carboxylate (**3a**):** Following the general procedure A, compound **3a** was obtained as a white solid in 90% yield (79.0 mg) and 96% *ee*; R<sub>f</sub> = 0.4 (petroleum ether/EtOAc/DCM = 6/1/1, v/v/v); m.p.: 117–119 °C; <sup>1</sup>H NMR (600 MHz, CDCl<sub>3</sub>)  $\delta$  7.35–7.28 (m, 1H), 7.25–7.16 (m, 4H), 7.14–7.00 (m, 4H), 5.45 (s, 1H), 5.42 (s, 1H), 4.54–4.27 (m, 2H), 3.62–3.49 (m, 1H), 3.42 (s, 3H), 2.99–2.94 (m, 1H), 2.88 (dd, *J* = 14.4, 8.9 Hz, 1H), 2.38 (s, 3H), <sup>13</sup>C NMR (150 MHz, CDCl<sub>3</sub>)  $\delta$  168.5, 150.1, 144.0, 137.6, 137.2, 136.1, 129.5(3C), 129.0(2C), 127.9(2C), 127.2(2C), 125.7, 119.2, 118.5, 55.2, 52.1, 33.2, 32.6, 21.6; **HRMS** (ESI-TOF) calcd for C<sub>23</sub>H<sub>23</sub>N<sub>2</sub>O<sub>4</sub>S [M+H]<sup>+</sup>: 423.1300, found: 423.1302. [ $\alpha$ ]<sub>D</sub><sup>20</sup> = -117.8 (*c* = 0.2, CH<sub>2</sub>Cl<sub>2</sub>); **HPLC** (Chiralpak IC-H, *n*-hexane/*i*-propanol = 80/20, flow rate = 1.0 mL/min,  $\lambda$  = 254 nm) t<sub>R</sub> = 32.692 min (major), 38.709 min (minor).

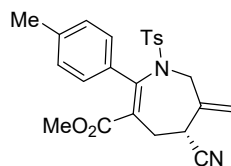

**Methyl (*R*)-5-cyano-6-methylene-2-(*p*-tolyl)-1-tosyl-4,5,6,7-tetrahydro-1*H*-azepine-3-carboxylate (**3b**):** Following the general procedure A, compound **3b** was obtained as a white solid in 84% yield (73.3 mg) and 96% *ee*; R<sub>f</sub> = 0.4 (petroleum ether/EtOAc/DCM = 6/1/1, v/v/v); m.p.: 121–123 °C; <sup>1</sup>H NMR (400 MHz, CDCl<sub>3</sub>)  $\delta$  7.27 (d, *J* = 8.1 Hz, 2H), 7.12 (d, *J* = 8.0 Hz, 2H), 7.00 (s, 4H), 5.45 (s, 1H), 5.43 (s, 1H), 4.53–4.28 (m, 2H), 3.55–3.49 (m, 1H),

3.47 (s, 3H), 2.94 (dd,  $J = 14.5, 3.3$  Hz, 1H), 2.85 (dd,  $J = 14.6, 8.6$  Hz, 1H), 2.41 (s, 3H), 2.36 (s, 3H);  $^{13}\text{C NMR}$  (150 MHz,  $\text{CDCl}_3$ )  $\delta$  168.6, 150.4, 143.9, 139.7, 137.6, 137.3, 133.2, 129.4(2C), 128.9(2C), 128.6(2C), 127.2(2C), 124.9, 119.2, 118.6, 55.2, 52.1, 33.2, 32.6, 21.6, 21.5; **HRMS** (ESI-TOF) calcd for  $\text{C}_{24}\text{H}_{25}\text{N}_2\text{O}_4\text{S}$   $[\text{M}+\text{H}]^+$ : 437.1530, found: 437.1528.  $[\alpha]_{\text{D}}^{20} = -101.0$  ( $c = 0.2$ ,  $\text{CH}_2\text{Cl}_2$ ); **HPLC** (Chiralpak IC-H, *n*-hexane/*i*-propanol = 80/20, flow rate = 1.0 mL/min,  $\lambda = 254$  nm)  $t_{\text{R}} = 36.215$  min (major), 41.963 min (minor).

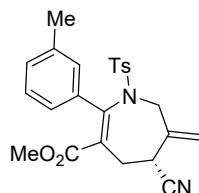

**Methyl (R)-5-cyano-6-methylene-2-(*m*-tolyl)-1-tosyl-4,5,6,7-tetrahydro-1H-azepine-3-carboxylate (3c)**: Following the general procedure A, compound **3c** was obtained as a white solid in 82% yield (71.6 mg) and 97% *ee*;  $R_{\text{f}} = 0.4$  (petroleum ether/EtOAc/DCM = 6/1/1, v/v/v); m.p.: 138-140 °C;  $^1\text{H NMR}$  (400 MHz,  $\text{CDCl}_3$ )  $\delta$  7.18 (d,  $J = 8.0$  Hz, 2H), 7.12 – 7.04 (m, 4H), 6.94 (d,  $J = 6.5$  Hz, 1H), 6.72 (s, 1H), 5.44 (s, 1H), 5.42 (s, 1H), 4.46 – 4.31 (m, 2H), 3.59 – 3.52 (m, 1H), 3.42 (s, 3H), 3.00 (dd,  $J = 14.5, 3.3$  Hz, 1H), 2.91 (dd,  $J = 14.6, 8.5$  Hz, 1H), 2.36 (s, 3H), 2.13 (s, 3H).  $^{13}\text{C NMR}$  (150 MHz,  $\text{CDCl}_3$ )  $\delta$  168.6, 150.3, 143.8, 137.8, 137.4, 137.3, 135.5, 130.3, 129.4, 129.3 (2C), 127.8, 127.1(2C), 126.6, 125.4, 119.0, 118.6, 55.3, 52.1, 33.2, 32.7, 21.6, 21.2.; **HRMS** (ESI-TOF) calcd for  $\text{C}_{24}\text{H}_{25}\text{N}_2\text{O}_4\text{S}$   $[\text{M}+\text{H}]^+$ : 437.1530, found: 437.1528.  $[\alpha]_{\text{D}}^{20} = -88.7$  ( $c = 0.4$ ,  $\text{CH}_2\text{Cl}_2$ ); **HPLC** (Chiralpak IC-H, *n*-hexane/*i*-propanol = 80/20, flow rate = 1.0 mL/min,  $\lambda = 254$  nm)  $t_{\text{R}} = 30.568$  min (major), 36.801 min (minor).

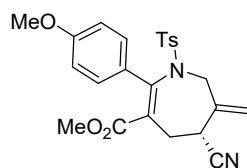

**Methyl (R)-5-cyano-2-(4-methoxyphenyl)-6-methylene-1-tosyl-4,5,6,7-tetrahydro-1H-azepine-3-carboxylate (3d)**: Following the general procedure A, compound **3d** was obtained as a white solid in 88% yield (79.6 mg) and 95% *ee*;  $R_{\text{f}} = 0.2$  (petroleum ether/EtOAc/DCM = 6/1/1, v/v/v); m.p.: 172-173 °C;  $^1\text{H NMR}$  (400 MHz,  $\text{CDCl}_3$ )  $\delta$  7.28 – 7.23 (m, 2H), 7.14 – 7.09 (m, 2H), 7.04 – 6.99 (m, 2H), 6.72 – 6.65 (m, 2H), 5.42 (d,  $J = 1.2$  Hz, 1H), 5.41 (s, 1H), 4.48 – 4.28 (m, 2H), 3.79 (s, 3H), 3.51 – 3.48 (m, 1H), 3.46 (s, 3H), 2.90 (dd,  $J = 14.4, 3.3$  Hz, 1H), 2.87 – 2.77 (m, 1H), 2.38 (s, 3H).  $^{13}\text{C NMR}$  (150 MHz,  $\text{CDCl}_3$ )  $\delta$  168.8, 160.8, 150.3, 143.9, 137.6, 137.4, 130.6(2C), 129.5(2C), 128.4, 127.2(2C), 124.0, 119.1, 118.6, 113.3(2C), 77.4, 77.2, 76.9, 55.4, 55.2, 52.1, 33.2, 32.6, 21.6; **HRMS** (ESI-TOF) calcd for  $\text{C}_{24}\text{H}_{25}\text{N}_2\text{O}_5\text{S}$   $[\text{M}+\text{H}]^+$ : 453.1479, found: 453.1483.  $[\alpha]_{\text{D}}^{20} = -74.1$  ( $c = 0.4$ ,  $\text{CH}_2\text{Cl}_2$ ); **HPLC**

(Chiralpak IC-H, *n*-hexane/*i*-propanol = 70/30, flow rate = 1.0 mL/min,  $\lambda$  = 254 nm)  $t_R$  = 26.064 min (major), 31.149 min (minor).

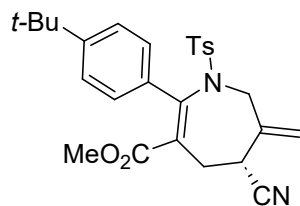

**Methyl (*R*)-2-(4-(tert-butyl)phenyl)-5-cyano-6-methylene-1-tosyl-4,5,6,7-tetrahydro-1*H*-azepine-3-carboxylate (3e):** Following the general procedure A, compound 3e was obtained as a white solid in 73% yield (69.8 mg) and 97% *ee*;  $R_f$  = 0.4 (petroleum ether/EtOAc/DCM = 6/1/1, v/v/v); m.p.: 119-120 °C;  $^1\text{H NMR}$  (600 MHz,  $\text{CDCl}_3$ )  $\delta$  7.18 – 7.15 (m, 2H), 7.14 – 7.12 (m, 2H), 7.04 (d,  $J$  = 8.0 Hz, 2H), 6.97 – 6.94 (m, 2H), 5.44 (d,  $J$  = 1.2 Hz, 1H), 5.42 (s, 1H), 4.48 – 4.31 (m, 2H), 3.56 (dd,  $J$  = 8.6, 4.6 Hz, 1H), 3.43 (s, 3H), 3.02 (dd,  $J$  = 14.4, 3.3 Hz, 1H), 2.94 (dd,  $J$  = 14.4, 8.6 Hz, 1H), 2.35 (s, 3H), 1.29 (s, 9H);  $^{13}\text{C NMR}$  (150 MHz,  $\text{CDCl}_3$ )  $\delta$  168.4, 152.6, 150.1, 143.5, 137.8, 137.4, 132.5, 129.3(2C), 128.7(2C), 127.1(2C), 125.2, 124.6(2C), 119.0, 118.5, 55.2, 52.0, 34.7, 33.2, 32.6, 31.3(3C), 21.5; **HRMS** (ESI-TOF) calcd for  $\text{C}_{27}\text{H}_{31}\text{N}_2\text{O}_4\text{S}$   $[\text{M}+\text{H}]^+$ : 479.1999, found: 479.2004.  $[\alpha]_D^{20}$  = -37.5 ( $c$  = 0.6,  $\text{CH}_2\text{Cl}_2$ ); **HPLC** (Chiralpak IC-H, *n*-hexane/*i*-propanol = 80/20, flow rate = 1.0 mL/min,  $\lambda$  = 254 nm)  $t_R$  = 31.497 min (major), 35.586 min (minor).

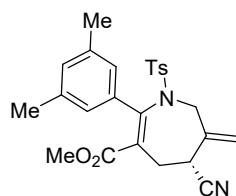

**Methyl (*R*)-5-cyano-2-(3,5-dimethoxyphenyl)-6-methylene-1-tosyl-4,5,6,7-tetrahydro-1*H*-azepine-3-carboxylate (3f):** Following the general procedure A, compound 3f was obtained as a white solid in 83% yield (74.7 mg) and 97% *ee*;  $R_f$  = 0.4 (petroleum ether/EtOAc/DCM = 6/1/1, v/v/v); m.p.: 119-120 °C;  $^1\text{H NMR}$  (400 MHz,  $\text{CDCl}_3$ )  $\delta$  7.22 (d,  $J$  = 8.3 Hz, 2H), 7.10 (d,  $J$  = 8.1 Hz, 2H), 6.91 (s, 1H), 6.64 (s, 2H), 5.46 (d,  $J$  = 9.0 Hz, 2H), 4.42 (s, 2H), 3.58 (d,  $J$  = 6.3 Hz, 1H), 3.47 (s, 3H), 3.10 – 2.89 (m, 2H), 2.40 (s, 3H), 2.17 (s, 6H).  $^{13}\text{C NMR}$  (150 MHz,  $\text{CDCl}_3$ )  $\delta$  168.7, 150.4, 143.6, 137.3, 137.2, 135.1, 131.2, 129.2, 127.1(2C), 126.8(2C), 124.0, 123.8, 118.8, 118.5, 55.3, 52.0, 33.2, 32.7, 21.5, 21.0; **HRMS** (ESI-TOF) calcd for  $\text{C}_{25}\text{H}_{27}\text{N}_2\text{O}_4\text{S}$   $[\text{M}+\text{H}]^+$ : 451.1686, found: 451.1697.  $[\alpha]_D^{20}$  = -73.5 ( $c$  = 0.3,  $\text{CH}_2\text{Cl}_2$ ); **HPLC** (Chiralpak IC-H, *n*-hexane/*i*-propanol = 80/20, flow rate = 1.0 mL/min,  $\lambda$  = 254 nm)  $t_R$  = 25.230 min (major), 29.476 min (minor).

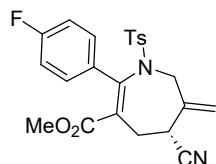

**Methyl (R)-5-cyano-2-(4-fluorophenyl)-6-methylene-1-tosyl-4,5,6,7-tetrahydro-1H-azepine-3-carboxylate (3g):** Following the general procedure A, compound **3g** was obtained as a white solid in 70% yield (68.4 mg) and 95% *ee*;  $R_f = 0.4$  (petroleum ether/EtOAc/DCM = 6/1/1, v/v/v); m.p.: 108-110 °C;  $^1\text{H NMR}$  (600 MHz,  $\text{CDCl}_3$ )  $\delta$  7.28 – 7.25 (m, 2H), 7.18 – 7.14 (m, 2H), 7.11 – 7.08 (m, 2H), 6.93 – 6.85 (m, 2H), 5.46 (d,  $J = 1.2$  Hz, 1H), 5.44 (s, 1H), 4.45 – 4.37 (m, 2H), 3.57 – 3.52 (m, 1H), 3.48 (s, 3H), 2.95 (dd,  $J = 14.4, 3.4$  Hz, 1H), 2.89 (dd,  $J = 14.5, 8.7$  Hz, 1H), 2.41 (s, 3H);  $^{13}\text{C NMR}$  (150 MHz,  $\text{CDCl}_3$ )  $\delta$  168.3, 163.4 (d,  $J_{\text{C-F}} = 250.3$  Hz), 149.2, 144.3, 137.4, 137.2, 132.2 (d,  $J_{\text{C-F}} = 3.3$  Hz), 131.0 (d,  $J_{\text{C-F}} = 8.6$  Hz), 129.8, 129.6, 127.1, 126.5, 125.6, 119.5, 118.5, 115.0 (d,  $J_{\text{C-F}} = 22.0$  Hz), 55.1, 52.3, 33.1, 32.5, 21.6;  $^{19}\text{F NMR}$  (565 MHz,  $\text{CDCl}_3$ )  $\delta$  -110.66. **HRMS** (ESI-TOF) calcd for  $\text{C}_{24}\text{H}_{22}\text{FN}_2\text{O}_4\text{S}$   $[\text{M}+\text{H}]^+$ : 441.1279, found: 441.1283.  $[\alpha]_{\text{D}}^{20} = -40.0$  ( $c = 0.1$ ,  $\text{CH}_2\text{Cl}_2$ ); **HPLC** (Chiralpak IC-H, *n*-hexane/*i*-propanol = 80/20, flow rate = 1.0 mL/min,  $\lambda = 254$  nm)  $t_{\text{R}} = 29.526$  min (major), 32.782 min (minor).

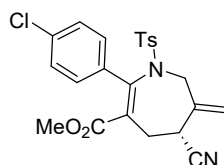

**Methyl (R)-2-(4-chlorophenyl)-5-cyano-6-methylene-1-tosyl-4,5,6,7-tetrahydro-1H-azepine-3-carboxylate (3h).** Following the general procedure A, compound **3h** was obtained as a colorless oil in 68% yield (62.0 mg) and 89% *ee*;  $R_f = 0.4$  (petroleum ether/EtOAc/DCM = 6/1/1, v/v/v);  $^1\text{H NMR}$  (400 MHz,  $\text{CDCl}_3$ )  $\delta$  7.29 – 7.25 (m, 2H), 7.19 – 7.12 (m, 4H), 7.07 – 7.01 (m, 2H), 5.51 – 5.40 (m, 2H), 4.42 (s, 2H), 3.55 (dd,  $J = 8.3, 3.6$  Hz, 1H), 3.49 (s, 3H), 3.03 – 2.83 (m, 2H), 2.43 (s, 3H);  $^{13}\text{C NMR}$  (100 MHz,  $\text{CDCl}_3$ )  $\delta$  168.1, 149.1, 144.3, 137.4, 137.2, 135.7, 134.6, 130.4(2C), 129.6(2C), 128.2(2C), 127.1(2C), 126.0, 119.5, 118.4, 55.2, 52.4, 33.1, 32.5, 21.7. **HRMS** (ESI-TOF) calcd for  $\text{C}_{23}\text{H}_{22}\text{ClN}_2\text{O}_4\text{S}$   $[\text{M}+\text{H}]^+$ : 457.0983, found: 457.0991;  $[\alpha]_{\text{D}}^{20} = -153.7$  ( $c = 0.1$ ,  $\text{CH}_2\text{Cl}_2$ ); **HPLC** (Chiralpak IA, *n*-hexane/*i*-propanol = 85/15, flow rate = 0.7 mL/min,  $\lambda = 254$  nm)  $t_{\text{R}} = 21.618$  min (major), 24.773 min (minor).

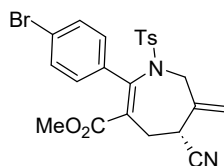

**Methyl (R)-2-(4-bromophenyl)-5-cyano-6-methylene-1-tosyl-4,5,6,7-tetrahydro-1H-azepine-3-carboxylate (3i):** Following the general procedure A, compound **3i** was obtained as a white solid in 46% yield (46.0 mg) and 90% *ee*;  $R_f = 0.4$  (petroleum ether/EtOAc/DCM =

6/1/1, v/v/v); m.p.: 154-155 °C; <sup>1</sup>H NMR (600 MHz, CDCl<sub>3</sub>) δ 7.30 – 7.25 (m, 2H), 7.24 – 7.20 (m, 2H), 7.12 (d, *J* = 8.4 Hz, 2H), 6.94 – 6.91 (m, 2H), 5.43 (s, 1H), 5.41 (s, 1H), 4.38 (s, 2H), 3.57 – 3.50 (m, 1H), 3.46 (s, 3H), 2.93 (dd, *J* = 14.4, 3.4 Hz, 1H), 2.87 (dd, *J* = 14.5, 8.6 Hz, 1H), 2.39 (s, 3H); <sup>13</sup>C NMR (150 MHz, CDCl<sub>3</sub>) 167.9, 149.0, 144.2, 137.3, 137.1, 134.9, 131.0(2C), 130.5 (2C), 129.5(2C), 127.0(2C), 125.9, 123.8, 119.4, 118.4, 55.1, 52.2, 32.9, 32.4, 21.6; **HRMS** (ESI-TOF) calcd for C<sub>23</sub>H<sub>22</sub>BrN<sub>2</sub>O<sub>4</sub>S [M+H]<sup>+</sup>: 501.0478, found: 501.0483. [α]<sub>D</sub><sup>20</sup> = -94.2 (*c* = 0.1, CH<sub>2</sub>Cl<sub>2</sub>); **HPLC** (Chiralpak IC-H, *n*-hexane/*i*-propanol = 80/20, flow rate = 1.0 mL/min, λ = 254 nm) t<sub>R</sub> = 26.563 min (major), 30.749 min (minor).

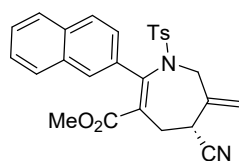

**Methyl (R)-5-cyano-6-methylene-2-(naphthalen-2-yl)-1-tosyl-4,5,6,7-tetrahydro-1H-azepine-3-carboxylate (3j)**: Following the general procedure A, compound **3j** was obtained as a yellow solid in 71% yield (76.5 mg) and 91% *ee*; R<sub>f</sub> = 0.4 (petroleum ether/EtOAc/DCM = 6/1/1, v/v/v); m.p.: 134-137 °C; <sup>1</sup>H NMR (600 MHz, CDCl<sub>3</sub>) δ 7.81 (d, *J* = 8.1 Hz, 1H), 7.67 (d, *J* = 8.5 Hz, 1H), 7.58 (d, *J* = 8.1 Hz, 1H), 7.52 (m, 1H), 7.47 (d, *J* = 7.2 Hz, 1H), 7.44 (s, 1H), 7.25 – 7.20 (m, 1H), 7.13 (d, *J* = 8.2 Hz, 2H), 6.84 (d, *J* = 8.1 Hz, 2H), 5.51 (s, 1H), 5.50 (s, 1H), 4.54 (s, 2H), 3.67 - 3.58 (m, 1H), 3.41 (s, 3H), 3.14 – 2.98 (m, 2H), 2.23 (s, 3H); <sup>13</sup>C NMR (150 MHz, CDCl<sub>3</sub>) δ 168.4, 150.4, 143.8, 137.8, 137.3, 133.5, 132.9, 132.5, 129.2(2C), 128.7, 128.4, 127.6, 127.4, 127.0, 126.9(2C), 126.5, 126.2, 125.6, 119.1, 118.5, 55.4, 52.1, 33.2, 32.7, 21.4; **HRMS** (ESI-TOF) calcd for C<sub>27</sub>H<sub>25</sub>N<sub>2</sub>O<sub>4</sub>S [M+H]<sup>+</sup>: 473.1530, found: 473.1536. [α]<sub>D</sub><sup>20</sup> = -102.5 (*c* = 0.3, CH<sub>2</sub>Cl<sub>2</sub>); **HPLC** (Chiralpak IC-H, *n*-hexane/*i*-propanol = 80/20, flow rate = 1.0 mL/min, λ = 254 nm) t<sub>R</sub> = 27.384 min (major), 28.818 min (minor).

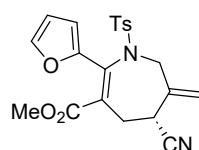

**Methyl (R)-5-cyano-2-(furan-2-yl)-6-methylene-1-tosyl-4,5,6,7-tetrahydro-1H-azepine-3-carboxylate (3k)**: Following the general procedure A, compound **3k** was obtained as a yellow solid in 79% yield (65.1 mg) and 93% *ee*; R<sub>f</sub> = 0.4 (petroleum ether/EtOAc/DCM = 6/1/1, v/v/v); m.p.: 93-95 °C; <sup>1</sup>H NMR (600 MHz, CDCl<sub>3</sub>) δ 7.55 (d, *J* = 8.2 Hz, 2H), 7.34 (d, *J* = 1.7 Hz, 1H), 7.30 – 7.27 (m, 2H), 6.55 (d, *J* = 3.5 Hz, 1H), 6.41 (dd, *J* = 3.5, 1.7 Hz, 1H), 5.42 (s, 1H), 5.41 (s, 1H), 4.43 (s, 1H), 4.28 (s, 1H), 3.69 (s, 3H), 3.41 (s, 1H), 2.72 – 2.66 (m, 1H), 2.62 – 2.50 (m, 1H), 2.45 (s, 3H); <sup>13</sup>C NMR (150 MHz, CDCl<sub>3</sub>) δ 168.1, 148.5, 144.3, 144.0, 137.8, 137.0, 137.0, 129.7(2C), 127.4(2C), 125.1, 119.5, 118.3, 114.1, 111.7, 54.3, 52.4, 33.1, 32.3, 21.6; **HRMS** (ESI-TOF) calcd for C<sub>21</sub>H<sub>21</sub>N<sub>2</sub>O<sub>5</sub>S [M+H]<sup>+</sup>: 413.1166, found:

413.1173.  $[\alpha]_{\text{D}}^{20} = -48.5$  ( $c = 0.6$ ,  $\text{CH}_2\text{Cl}_2$ ); **HPLC** (Chiralpak IC-H, *n*-hexane/*i*-propanol = 70/30, flow rate = 0.7 mL/min,  $\lambda = 254$  nm)  $t_{\text{R}} = 27.740$  min (major), 31.326 min (minor).

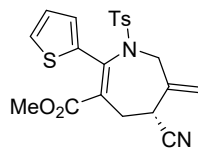

**Methyl (R)-5-cyano-6-methylene-2-(thiophen-2-yl)-1-tosyl-4,5,6,7-tetrahydro-1H-azepine-3-carboxylate (3l):** Following the general procedure A, compound **3l** was obtained as a yellow solid in 77% yield (65.9 mg) and 88% *ee*;  $R_{\text{f}} = 0.4$  (petroleum ether/EtOAc/DCM = 6/1/1, v/v/v); m.p.: 107-108 °C; **<sup>1</sup>H NMR** (600 MHz,  $\text{CDCl}_3$ )  $\delta$  7.40 (d,  $J = 8.2$  Hz, 2H), 7.33 (dd,  $J = 5.1, 1.2$  Hz, 1H), 7.18 (d,  $J = 8.0$  Hz, 2H), 7.01 (dd,  $J = 3.7, 1.2$  Hz, 1H), 6.90 (dd,  $J = 5.0, 3.6$  Hz, 1H), 5.44 (s, 1H), 5.42 (s, 1H), 4.41 (br, 1H), 4.29 (br, 1H), 3.56 (s, 3H), 3.48 (s, 1H), 2.83 (dd,  $J = 14.4, 3.3$  Hz, 1H), 2.73 (br, 1H), 2.40 (s, 3H); **<sup>13</sup>C NMR** (150 MHz,  $\text{CDCl}_3$ )  $\delta$  168.3, 144.1, 142.0, 138.3, 137.2, 129.9, 129.6(2C), 128.8, 127.2(2C), 126.8, 126.6, 119.5, 118.3, 54.5, 52.4, 33.0, 32.6, 21.6; **HRMS** (ESI-TOF) calcd for  $\text{C}_{21}\text{H}_{21}\text{N}_2\text{O}_4\text{S}_2$   $[\text{M}+\text{H}]^+$ : 429.0937, found: 429.0944.  $[\alpha]_{\text{D}}^{20} = -51.6$  ( $c = 0.2$ ,  $\text{CH}_2\text{Cl}_2$ ); **HPLC** (Chiralpak IC-H, *n*-hexane/*i*-propanol = 80/20, flow rate = 1.0 mL/min,  $\lambda = 254$  nm)  $t_{\text{R}} = 31.441$  min (major), 35.151 min (minor).

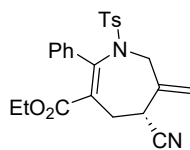

**Ethyl (R)-5-cyano-6-methylene-2-phenyl-1-tosyl-4,5,6,7-tetrahydro-1H-azepine-3-carboxylate (3m):** Following the general procedure A, compound **3m** was obtained as a white solid in 88% yield (76.8 mg) and 95% *ee*;  $R_{\text{f}} = 0.4$  (petroleum ether/EtOAc/DCM = 6/1/1, v/v/v); m.p.: 128-129 °C; **<sup>1</sup>H NMR** (600 MHz,  $\text{CDCl}_3$ )  $\delta$  7.35 – 7.30 (m, 1H), 7.25 – 7.17 (m, 4H), 7.14 – 7.09 (m, 4H), 5.47 (d,  $J = 1.3$  Hz, 1H), 5.44 (d,  $J = 1.0$  Hz, 1H), 4.52 – 4.34 (m, 2H), 3.96 – 3.86 (m, 2H), 3.56 (d,  $J = 6.7$  Hz, 1H), 3.06 – 2.86 (m, 2H), 2.40 (s, 3H), 0.84 (t,  $J = 7.1$  Hz, 3H); **<sup>13</sup>C NMR** (150 MHz,  $\text{CDCl}_3$ )  $\delta$  168.1, 149.9, 143.9, 137.7, 137.1, 136.2, 129.5(2C), 129.4, 129.1(2C), 127.8(2C), 127.2(2C), 126.0, 119.0, 118.6, 61.3, 55.2, 33.2, 32.6, 21.6, 13.5; **HRMS** (ESI-TOF) calcd for  $\text{C}_{24}\text{H}_{25}\text{N}_2\text{O}_4\text{S}$   $[\text{M}+\text{H}]^+$ : 437.1530, found: 437.1535.  $[\alpha]_{\text{D}}^{20} = -76.1$  ( $c = 0.3$ ,  $\text{CH}_2\text{Cl}_2$ ); **HPLC** (Chiralpak IC-H, *n*-hexane/*i*-propanol = 80/20, flow rate = 1.0 mL/min,  $\lambda = 254$  nm)  $t_{\text{R}} = 33.345$  min (major), 37.913 min (minor).

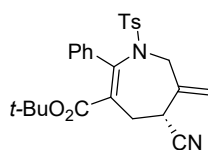



**tert-Butyl (*R*)-5-cyano-6-methylene-2-phenyl-1-tosyl-4,5,6,7-tetrahydro-1*H*-azepine-3-carboxylate (**3n**):** Following the general procedure **A**, compound **3n** was obtained as a white solid in 86% yield (79.9 mg) and 96% *ee*;  $R_f = 0.4$  (petroleum ether/EtOAc/DCM = 6/1/1, v/v/v); m.p.: 107-109 °C;  $^1\text{H NMR}$  (600 MHz,  $\text{CDCl}_3$ )  $\delta$  7.31 – 7.27 (m, 1H), 7.20 – 7.14 (m, 4H), 7.10 – 7.05 (m, 4H), 5.41 (s, 1H), 5.40 (s, 1H), 4.45 – 4.21 (m, 2H), 3.62 – 3.44 (m, 1H), 3.02 – 2.76 (m, 2H), 2.36 (s, 3H), 1.09 (s, 9H);  $^{13}\text{C NMR}$  (150 MHz,  $\text{CDCl}_3$ )  $\delta$  167.1, 148.8, 143.7, 138.0, 137.3, 136.5, 129.4(2C), 129.3(2C), 129.1, 127.8(2C), 127.7, 127.1(2C), 118.9, 118.6, 81.9, 55.1, 33.2, 32.6, 27.4(3C), 21.6; **HRMS** (ESI-TOF) calcd for  $\text{C}_{26}\text{H}_{29}\text{N}_2\text{O}_4\text{S}$   $[\text{M}+\text{H}]^+$ : 465.1843, found: 465.1840.  $[\alpha]_{\text{D}}^{20} = -138.2$  ( $c = 0.7$ ,  $\text{CH}_2\text{Cl}_2$ ); **HPLC** (Chiralpak IC-H, *n*-hexane/*i*-propanol = 80/20, flow rate = 1.0 mL/min,  $\lambda = 254$  nm)  $t_{\text{R}} = 20.162$  min (major), 26.798 min (minor).

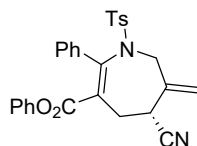

**Phenyl (*R*)-5-cyano-6-methylene-2-phenyl-1-tosyl-4,5,6,7-tetrahydro-1*H*-azepine-3-carboxylate (**3o**):** Following the general procedure **A**, compound **3o** was obtained as a white solid in 68% yield (65.9 mg) and 93% *ee*;  $R_f = 0.4$  (petroleum ether/EtOAc/DCM = 6/1/1, v/v/v); m.p.: 126-128 °C;  $^1\text{H NMR}$  (600 MHz,  $\text{CDCl}_3$ )  $\delta$  7.40 – 7.36 (m, 1H), 7.28 – 7.22 (m, 8H), 7.17 – 7.11 (m, 3H), 6.70 – 6.64 (m, 2H), 5.50 (d,  $J = 1.2$  Hz, 1H), 5.49 (s, 1H), 4.55 (d,  $J = 14.7$  Hz, 1H), 4.45 (d,  $J = 14.7$  Hz, 1H), 3.67 (dd,  $J = 7.1, 3.5$  Hz, 1H), 3.17 – 3.02 (m, 2H), 2.41 (s, 3H);  $^{13}\text{C NMR}$  (150 MHz,  $\text{CDCl}_3$ )  $\delta$  166.8, 151.6, 150.3, 144.1, 137.5, 137.2, 136.1, 129.9, 129.6(2C), 129.5(2C), 129.3(2C), 128.2(2C), 127.2(2C), 126.0, 124.9, 121.1(2C), 119.7, 118.5, 55.2, 33.3, 33.0, 21.6; **HRMS** (ESI-TOF) calcd for  $\text{C}_{28}\text{H}_{25}\text{N}_2\text{O}_4\text{S}$   $[\text{M}+\text{H}]^+$ : 485.1530, found: 485.1533.  $[\alpha]_{\text{D}}^{20} = -66.7$  ( $c = 0.3$ ,  $\text{CH}_2\text{Cl}_2$ ); **HPLC** (Chiralpak IC-H, *n*-hexane/*i*-propanol = 80/20, flow rate = 1.0 mL/min,  $\lambda = 254$  nm)  $t_{\text{R}} = 35.724$  min (major), 40.839 min (minor).

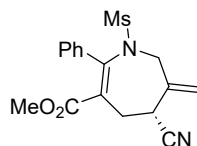

**Methyl (*R*)-5-cyano-6-methylene-1-(methylsulfonyl)-2-phenyl-4,5,6,7-tetrahydro-1*H*-azepine-3-carboxylate (**3p**):** Following the general procedure **A**, compound **3p** was obtained as a white solid in 40% yield (27.7 mg) and 93% *ee*;  $R_f = 0.4$  (petroleum ether/EtOAc/DCM = 6/1/1, v/v/v); m.p.: 83-85 °C;  $^1\text{H NMR}$  (600 MHz,  $\text{CDCl}_3$ )  $\delta$  7.41 – 7.38 (m, 3H), 7.32 – 7.29 (m, 2H), 5.48 (s, 1H), 5.40 (s, 1H), 4.42 – 4.30 (m, 2H), 3.71 – 3.63 (m, 1H), 3.46 (s, 3H), 3.20 – 3.16 (m, 1H), 3.16 – 3.12 (m, 1H), 2.49 (s, 3H);  $^{13}\text{C NMR}$  (150 MHz,  $\text{CDCl}_3$ )  $\delta$  167.9, 149.8, 137.9, 136.0, 129.9, 128.9(2C), 128.3(2C), 126.2, 118.9, 118.4, 54.8, 52.1, 41.8, 33.3, 32.8; **HRMS** (ESI-

TOF) calcd for C<sub>17</sub>H<sub>19</sub>N<sub>2</sub>O<sub>4</sub>S [M+H]<sup>+</sup>: 347.1060, found: 347.1062. [α]<sub>D</sub><sup>20</sup> = -77.0 (c = 0.1, CH<sub>2</sub>Cl<sub>2</sub>); **HPLC** (Chiralpak IC-H, *n*-hexane/*i*-propanol = 80/20, flow rate = 1.0 mL/min, λ = 254 nm) t<sub>R</sub>=28.455 min (major), 30.833 min (minor).

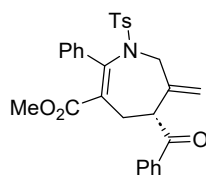

**Methyl (R)-5-benzoyl-6-methylene-2-phenyl-1-tosyl-4,5,6,7-tetrahydro-1H-azepine-3-carboxylate (3q):** Following the general procedure **A**, compound **3q** was obtained as a yellow solid in 72% yield (77.2 mg) and 87% *ee*; R<sub>f</sub> = 0.4 (petroleum ether/EtOAc/DCM = 6/1/1, v/v/v); m.p.: 99-100 °C; **<sup>1</sup>H NMR** (400 MHz, CDCl<sub>3</sub>) δ 8.02 – 7.94 (m, 2H), 7.61 – 7.56 (m, 1H), 7.48 (dd, *J* = 8.3, 7.0 Hz, 2H), 7.30 – 7.27 (m, 3H), 7.24 – 7.18 (m, 2H), 7.16 – 7.12 (m, 4H), 5.29 (s, 1H), 5.02 (s, 1H), 4.66 – 4.46 (m, 3H), 3.38 (s, 3H), 2.97 – 2.85 (m, 2H), 2.40 (s, 3H); **<sup>13</sup>C NMR** (100 MHz, CDCl<sub>3</sub>) δ 199.4, 169.0, 146.2, 143.5, 133.4, 129.5, 129.4(2C), 129.2, 129.0(2C), 128.9, 128.8(2C), 128.7(2C), 128.1, 127.8(2C), 127.5, 127.2(2C), 126.5, 110.9, 51.8, 47.7, 42.4, 37.4, 21.6; **HRMS** (ESI-TOF) calcd for C<sub>29</sub>H<sub>28</sub>NO<sub>5</sub>S [M+H]<sup>+</sup>: 502.1683, found: 502.1689; [α]<sub>D</sub><sup>20</sup> = -30.7 (c = 0.2, CH<sub>2</sub>Cl<sub>2</sub>); **HPLC** (Chiralpak IC-H, *n*-hexane/*i*-propanol = 70/30, flow rate = 0.7 mL/min, λ = 254 nm) t<sub>R</sub>=12.445 min (major), 18.648 min (minor).

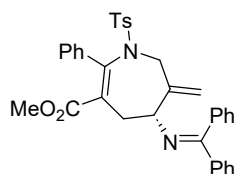

**Methyl (R)-5-((diphenylmethylene)amino)-6-methylene-2-phenyl-1-tosyl-4,5,6,7-tetrahydro-1H-azepine-3-carboxylate (3r):** Following the general procedure **A**, compound **3r** was obtained as a yellow solid in 68% yield (72 mg) and 87% *ee*; R<sub>f</sub> = 0.4 (petroleum ether/EtOAc/DCM = 12/1/1, v/v/v and tol:acetone=20:1,v/v); m.p.: 78-81 °C; **<sup>1</sup>H NMR** (600 MHz, CDCl<sub>3</sub>) δ 7.56 – 7.53 (m, 2H), 7.49 – 7.44 (m, 3H), 7.39 – 7.36 (m, 2H), 7.36 – 7.30 (m, 2H), 7.30 – 7.24 (m, 4H), 7.22 (d, *J* = 7.1 Hz, 2H), 7.14 (dd, *J* = 7.5, 1.9 Hz, 4H), 5.17 (s, 1H), 4.91 (s, 1H), 4.69 (br, 1H), 4.40 (br, 1H), 4.08 – 3.98 (m, 1H), 3.35 (s, 3H), 2.68 (dd, *J* = 13.4, 7.1 Hz, 1H), 2.44 (dd, *J* = 13.3, 3.1 Hz, 1H), 2.40 (s, 3H); **<sup>13</sup>C NMR** (151 MHz, CDCl<sub>3</sub>) δ 167.2, 147.4, 144.7, 143.4, 134.0, 137.7, 136.4, 130.2, 129.4(2C), 128.9(3C), 128.6(4C), 128.6, 128.1(3C), 127.8(2C), 127.6(2C), 127.4(2C), 117.0, 62.1, 54.2, 51.7, 36.3, 21.7. **HRMS** (ESI-TOF) calcd for C<sub>35</sub>H<sub>33</sub>N<sub>2</sub>O<sub>4</sub>S [M+H]<sup>+</sup>: 577.2156, found: 577.2157. [α]<sub>D</sub><sup>20</sup> = -59.3 (c = 0.4, CH<sub>2</sub>Cl<sub>2</sub>); **HPLC** (Chiralpak IC-H, *n*-hexane/*i*-propanol = 80/20, flow rate = 1.0 mL/min, λ = 254 nm) t<sub>R</sub>=17.435 min (major), 19.757 min (minor).

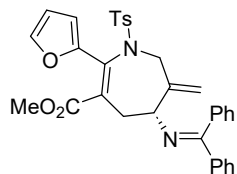

**Methyl (R)-5-((diphenylmethylene)amino)-2-(furan-2-yl)-6-methylene-1-tosyl-4,5,6,7-tetrahydro-1H-azepine-3-carboxylate (3s):** Following the general procedure A, compound **3s** was obtained as a colorless oil in 53% yield (60 mg) and 84% *ee*;  $R_f = 0.4$  (petroleum ether/EtOAc/DCM = 12/1/1, v/v/v);  $^1\text{H NMR}$  (400 MHz,  $\text{CDCl}_3$ )  $\delta$  7.63 (d,  $J = 8.2$  Hz, 2H), 7.58 – 7.52 (m, 2H), 7.49 – 7.43 (m, 3H), 7.43 – 7.33 (m, 2H), 7.27 (dd,  $J = 16.4, 8.2$  Hz, 4H), 7.16 – 7.06 (m, 2H), 6.56 (dd,  $J = 3.4, 0.8$  Hz, 1H), 6.45 (dd,  $J = 3.4, 1.9$  Hz, 1H), 5.11 (s, 1H), 4.85 (s, 1H), 4.63 (d,  $J = 14.0$  Hz, 1H), 4.38 (br, 1H), 3.92 (dd,  $J = 7.3, 2.6$  Hz, 1H), 3.56 (s, 3H), 2.48 (dd,  $J = 13.6, 7.3$  Hz, 1H), 2.42 (s, 3H), 2.15 (dd,  $J = 13.6, 2.6$  Hz, 1H);  $^{13}\text{C NMR}$  (100 MHz,  $\text{CDCl}_3$ )  $\delta$  169.7, 167.2, 150.2, 144.5, 143.7, 143.4, 139.4, 137.8, 136.4, 136.0, 130.3, 129.6(2C), 128.6(4C), 128.6, 128.0(2C), 127.6(2C), 127.6(2C), 127.3, 116.8, 112.5, 111.7, 61.8, 53.5, 51.9, 36.2, 21.7. **HRMS** (ESI-TOF) calcd for  $\text{C}_{33}\text{H}_{31}\text{N}_2\text{O}_5\text{S}$   $[\text{M}+\text{H}]^+$ : 567.1948, found: 567.1979.  $[\alpha]_{\text{D}}^{20} = -113.1$  ( $c = 0.6$ ,  $\text{CH}_2\text{Cl}_2$ ); **HPLC** (Chiralpak IA, *n*-hexane/*i*-propanol = 80/20, flow rate = 0.9 mL/min,  $\lambda = 254$  nm)  $t_{\text{R}} = 7.970$  min (major), 19.937 min (minor).

### 3 Gram-scale preparation of compound **3a**

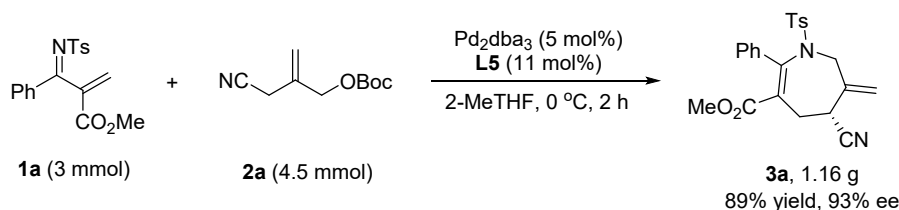

To a flame-dried and N<sub>2</sub>-purged round-bottom flask was added ligand **L5** (162 mg, 0.33 mmol, 11 mol%), and Pd<sub>2</sub>(dba)<sub>3</sub> (138 mg, 0.15 mmol, 5 mol%) and anhydrous 2-Me-THF (30.0 mL). The resulting solution was stirred for 0.5 h at room temperature. Then the reaction tube was moved to 0 °C. After 5 minutes,  $\alpha,\beta$ -unsaturated imine **1a** (3 mmol, 1.0 equiv) and trimethylenemethane (TMM) donor **2a** (4.5 mmol, 1.5 equiv) was added sequentially. The resulting solution was stirred vigorously at 0 °C. Once starting material was consumed (monitored by TLC), the mixture was concentrated and purified by column chromatography (PE/EA/DCM = 6:1:1, v/v/v) to give the desired product **3a** as a light yellow solid (1.16 g, 89%, 93% ee).

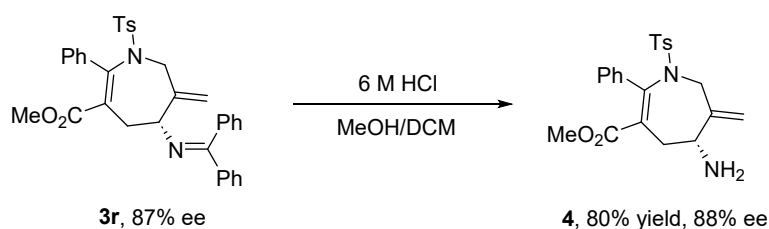

To a solution of **3r** (27.8 mg, 0.05 mmol, 87% ee) in DCM (1 mL) and MeOH (1 mL) was added 6M HCl (20 eq.) at 0 °C, the resulting solution was stirred for 2 h at room temperature. Once starting material was consumed (monitored by TLC), the sodium bicarbonate saturated solution was added at 0 °C to adjust pH > 8. Then the mixture extracted with EA (3 times). The organic phase was concentrated and residue was purified by column chromatography (EA, R<sub>f</sub> = 0.1) to give the desired product **4** as a yellow oil (16 mg, 80% yield, 88% ee). **<sup>1</sup>H NMR** (400 MHz, CDCl<sub>3</sub>)  $\delta$  7.32 – 7.24 (m, 3H), 7.22 – 7.17 (m, 2H), 7.15 – 7.08 (m, 4H), 5.21 – 5.14 (m, 2H), 4.52 (d, *J* = 13.9 Hz, 1H), 4.26 (d, *J* = 13.9 Hz, 1H), 3.66 – 3.57 (m, 1H), 3.42 (s, 3H), 2.68 (dd, *J* = 14.0, 3.6 Hz, 1H), 2.53 (dd, *J* = 13.9, 8.1 Hz, 1H), 2.38 (s, 3H), 1.97 (br, 2H). **<sup>13</sup>C NMR** (100 MHz, CDCl<sub>3</sub>)  $\delta$  169.6, 147.2, 143.4, 137.4, 136.9, 129.3(2C), 128.9, 128.8(2C), 127.7(2C), 127.67, 127.2(2C), 115.6, 53.5, 51.9, 51.6, 37.0, 21.5. **HRMS** (ESI-TOF) calcd for C<sub>22</sub>H<sub>24</sub>N<sub>2</sub>O<sub>4</sub>S [M+H]<sup>+</sup>: 413.1530, found: 413.1526. [ $\alpha$ ]<sub>D</sub><sup>20</sup> = -100.8 (*c* = 0.1, CH<sub>2</sub>Cl<sub>2</sub>); **HPLC** (Chiralpak IF, *n*-hexane/*i*-propanol = 70/30, flow rate = 0.7 mL/min,  $\lambda$  = 254 nm) t<sub>R</sub> = 27.238 min (major), 35.031 min (minor).



|                                   |                                             |
|-----------------------------------|---------------------------------------------|
| Crystal size                      | 0.260 x 0.250 x 0.23 mm <sup>3</sup>        |
| Theta range for data collection   | 3.547 to 68.492°.                           |
| Index ranges                      | -7<=h<=7, -14<=k<=16, -15<=l<=14            |
| Reflections collected             | 14460                                       |
| Independent reflections           | 3873 [R(int) = 0.0337]                      |
| Completeness to theta = 67.679°   | 99.5 %                                      |
| Absorption correction             | multi-scan                                  |
| Max. and min. transmission        | 0.7531 and 0.6189                           |
| Refinement method                 | Full-matrix least-squares on F <sup>2</sup> |
| Data / restraints / parameters    | 3873 / 25 / 291                             |
| Goodness-of-fit on F <sup>2</sup> | 1.107                                       |
| Final R indices [I>2sigma(I)]     | R1 = 0.0295, wR2 = 0.0839                   |
| R indices (all data)              | R1 = 0.0301, wR2 = 0.0849                   |
| Extinction coefficient            | 0.041(6)                                    |
| Largest diff. peak and hole       | 0.278 and -0.420 e.Å <sup>-3</sup>          |

## 5 References

1. H. Liu, Q. Zhang, L. Wang and X. Tong, PPh<sub>3</sub>-catalyzed reactions of alkyl propiolates with N-tosylimines: A facile synthesis of alkyl 2-[aryl(tosylimino)methyl]acrylate and an insight into the reaction mechanism, *Chem. Eur. J.*, 2010, **16**, 1968–1972.
2. B. M. Trost and G. Mata, Enantioselective palladium-catalyzed [3+2] cycloaddition of trimethylenemethane and fluorinated ketones, *Angew. Chem., Int. Ed.*, 2018, **57**, 12333–12337.

## 6 $^1\text{H}$ NMR and $^{13}\text{C}$ NMR spectra

$^1\text{H}$  NMR of **3a** in  $\text{CDCl}_3$  (600 MHz)

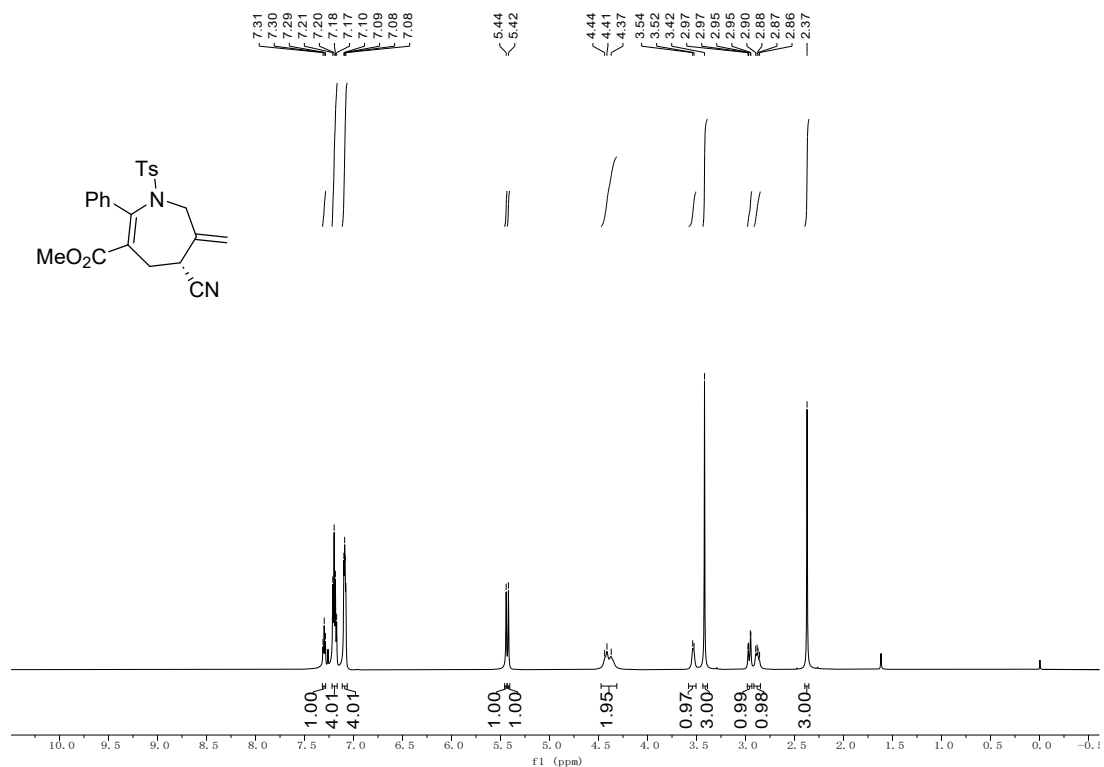

$^{13}\text{C}$  NMR of **3a** in  $\text{CDCl}_3$  (150 MHz)

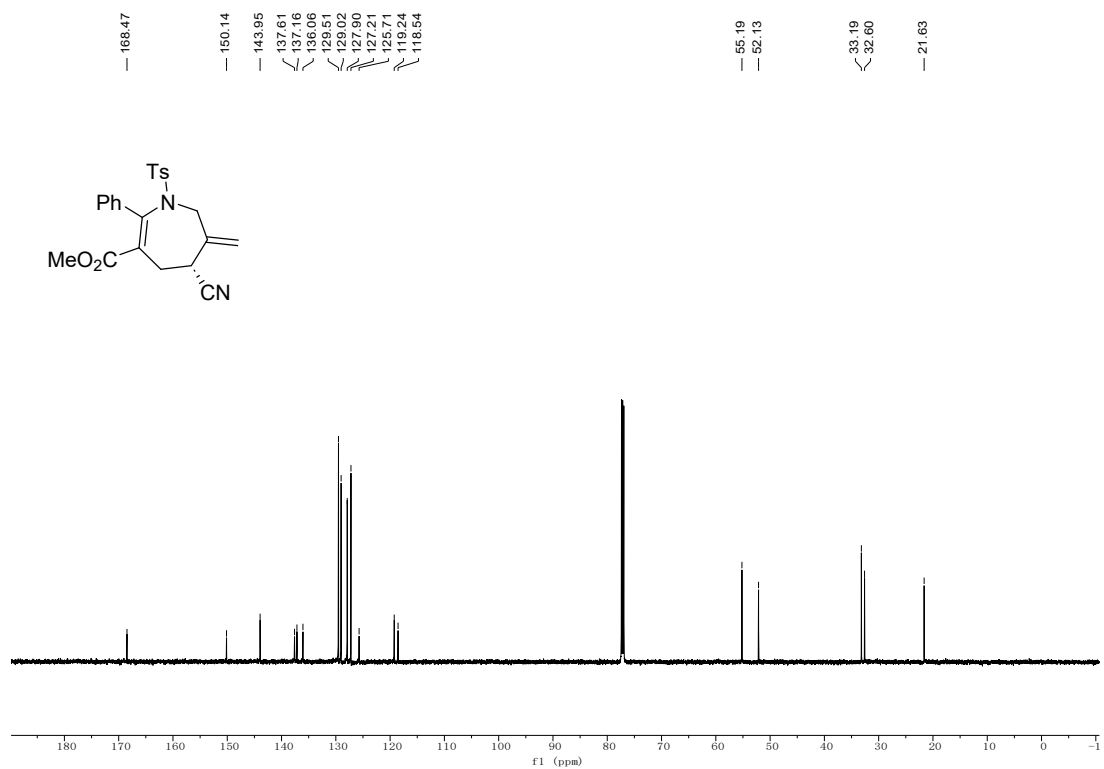

$^1\text{H}$  NMR of **3b** in  $\text{CDCl}_3$  (600 MHz)

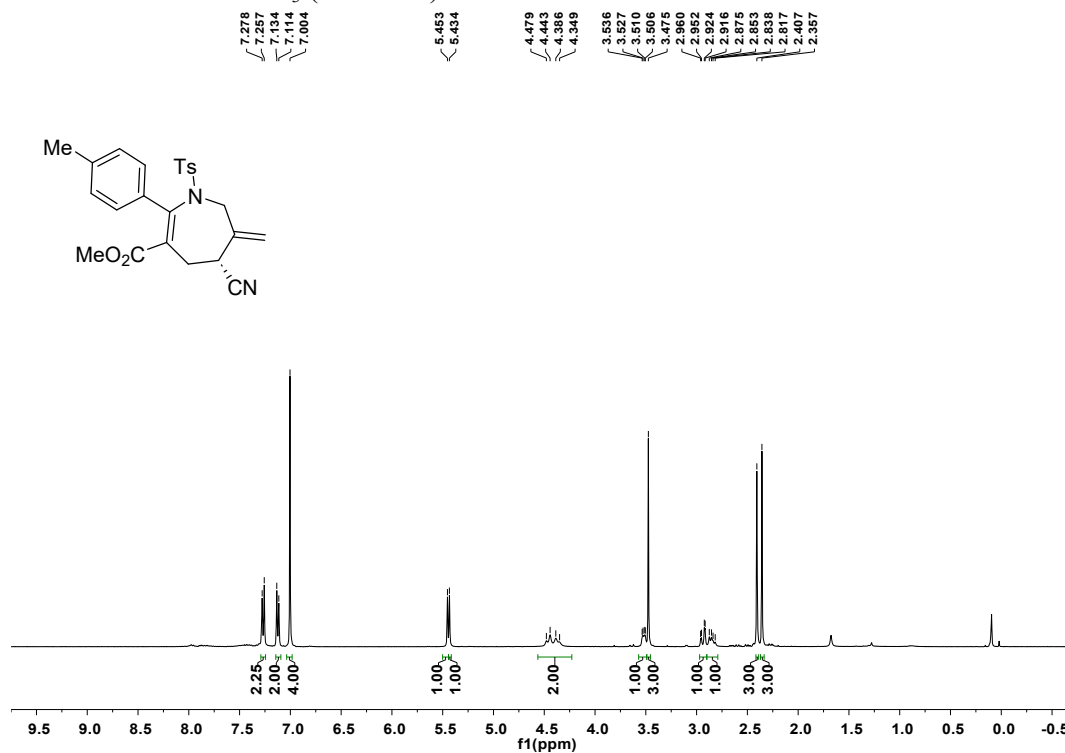

$^{13}\text{C}$  NMR of **3b** in  $\text{CDCl}_3$  (150 MHz)

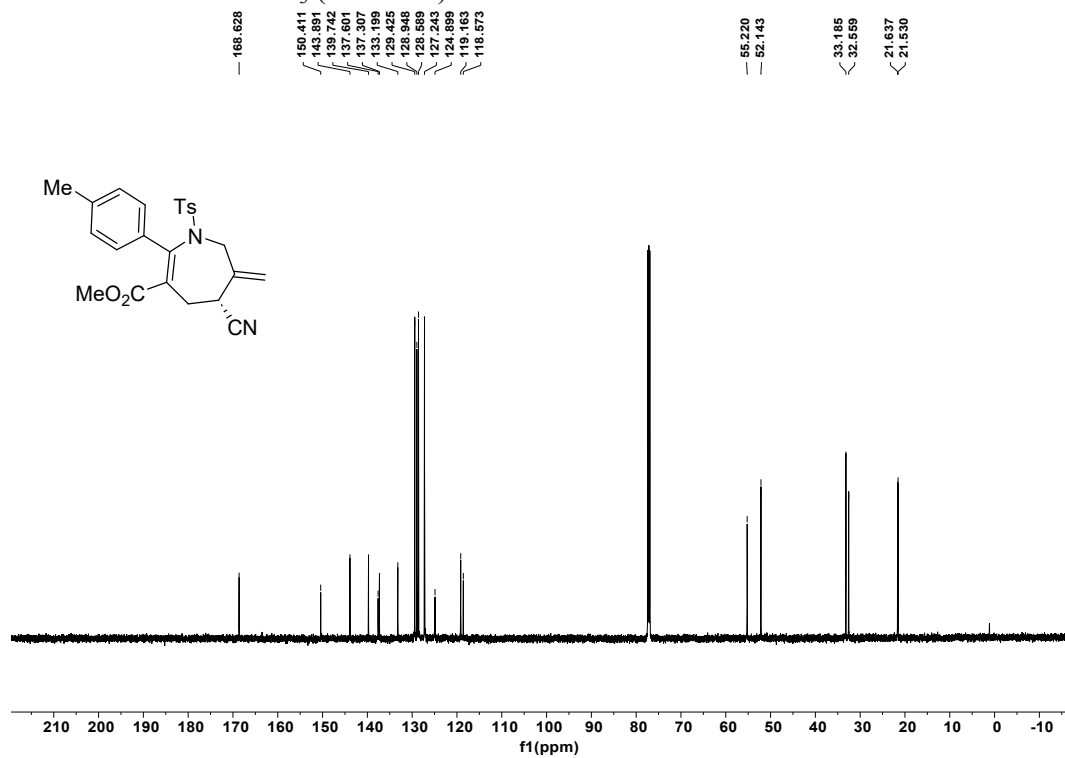



$^1\text{H}$  NMR of **3c** in  $\text{CDCl}_3$  (600 MHz)

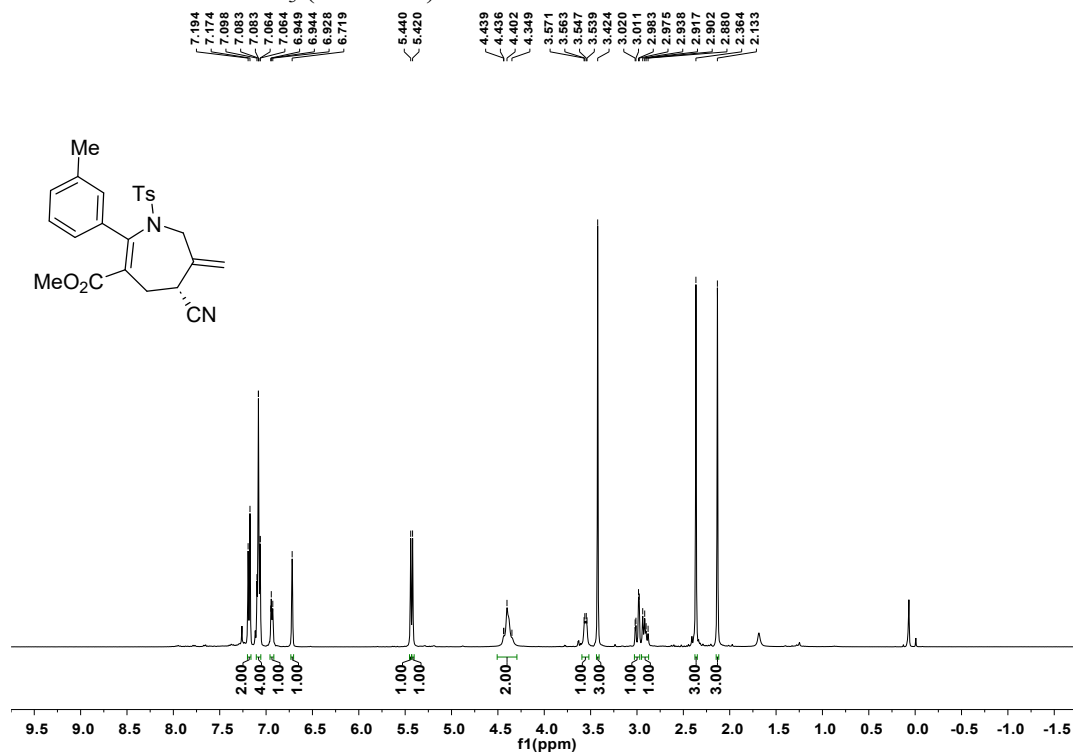

$^{13}\text{C}$  NMR of **3c** in  $\text{CDCl}_3$  (150 MHz)

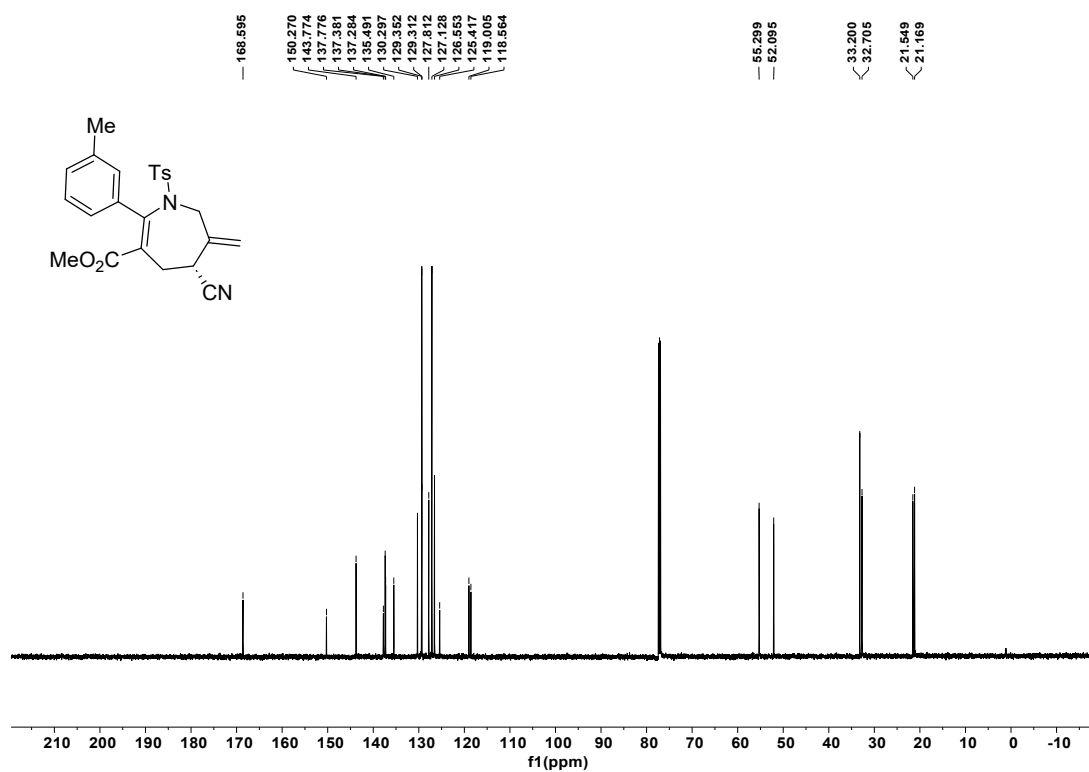

$^1\text{H}$  NMR of **3d** in  $\text{CDCl}_3$  (600 MHz)

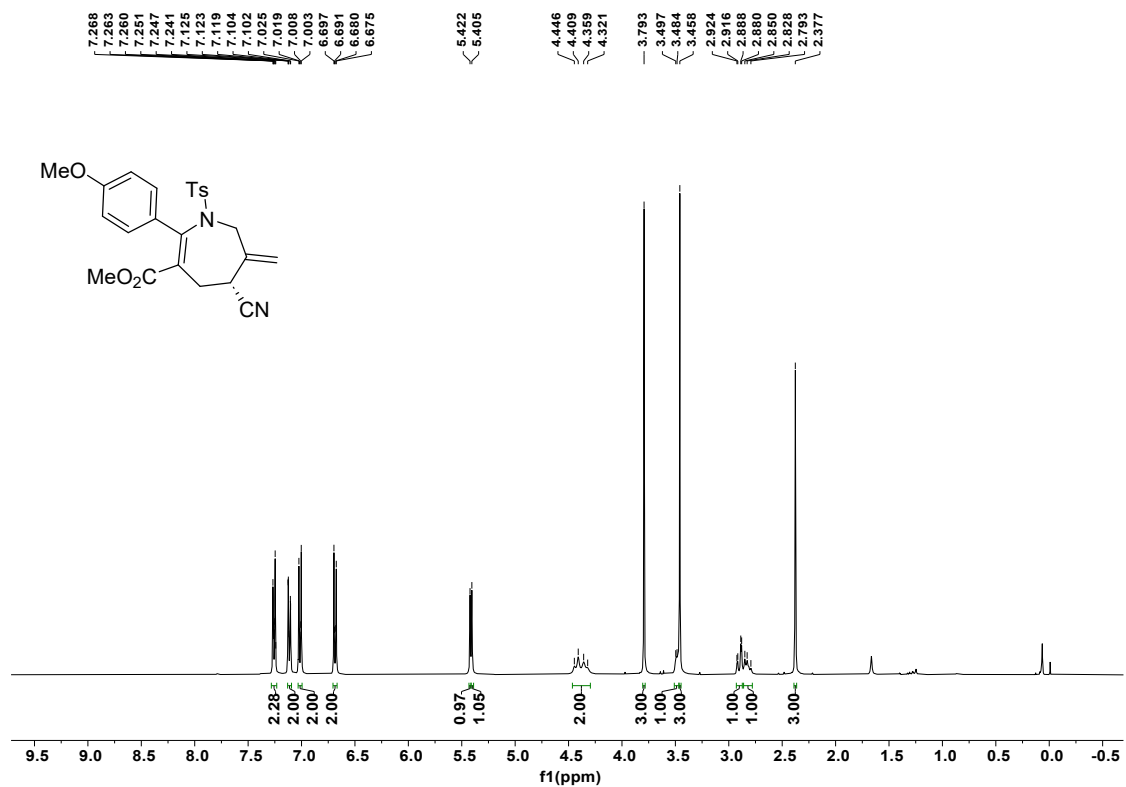

$^{13}\text{C}$  NMR of **3d** in  $\text{CDCl}_3$  (150 MHz)

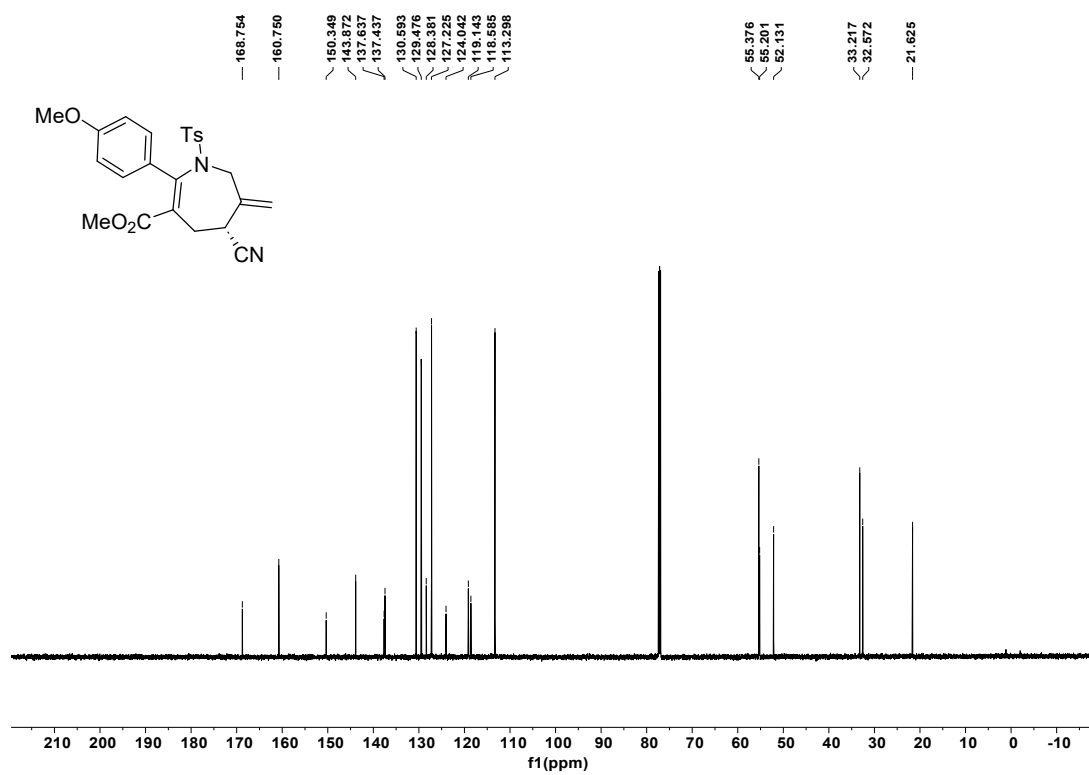

$^1\text{H}$  NMR of **3e** in  $\text{CDCl}_3$  (600 MHz)

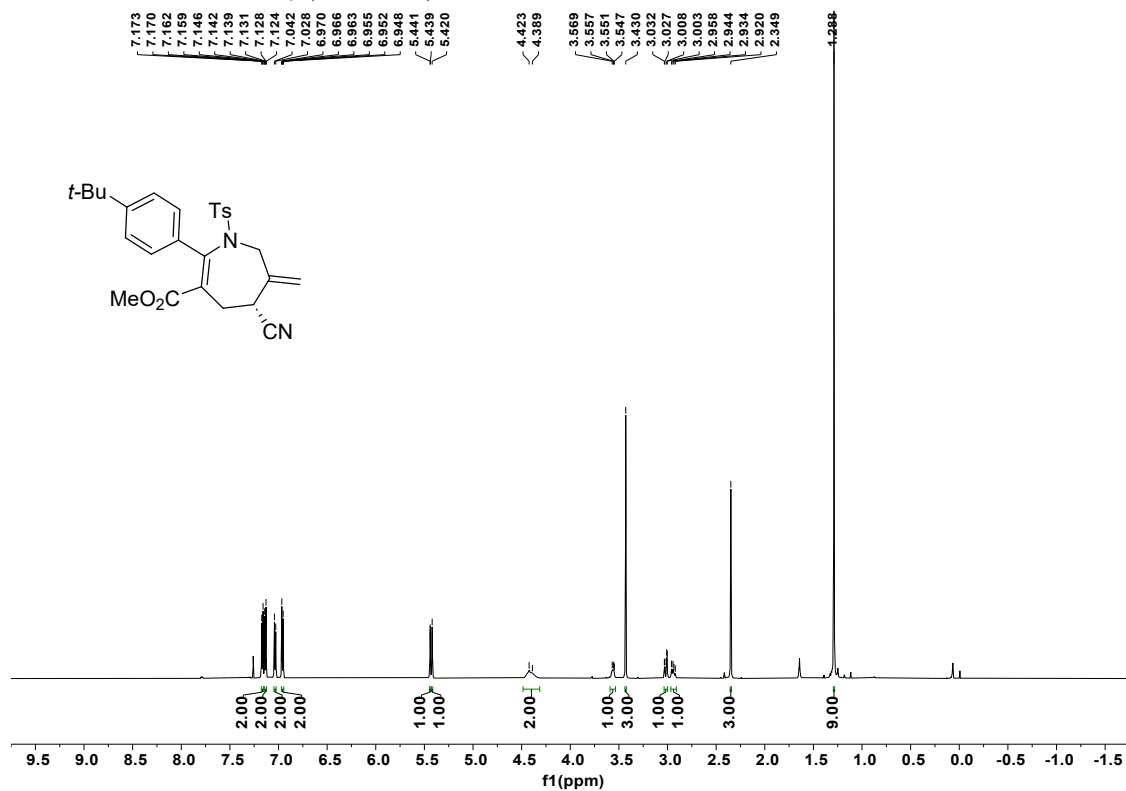

$^{13}\text{C}$  NMR of **3e** in  $\text{CDCl}_3$  (150 MHz)

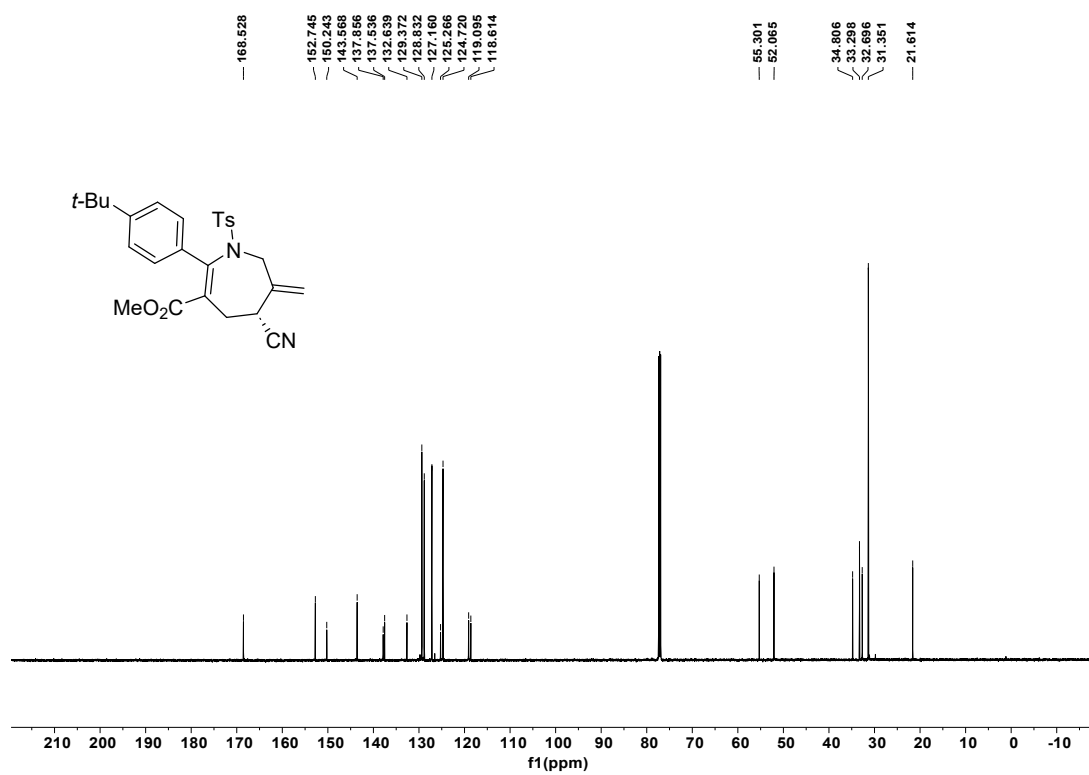

$^1\text{H}$  NMR of **3f** in  $\text{CDCl}_3$  (600 MHz)

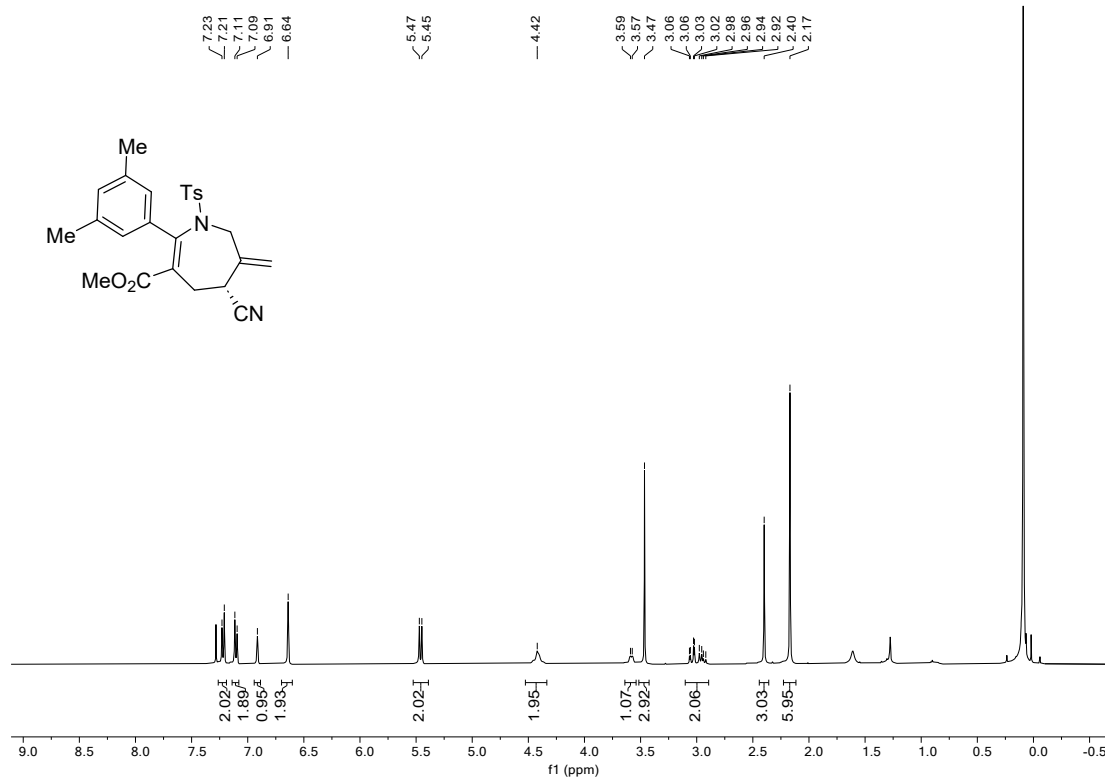

$^{13}\text{C}$  NMR of **3f** in  $\text{CDCl}_3$  (150 MHz)

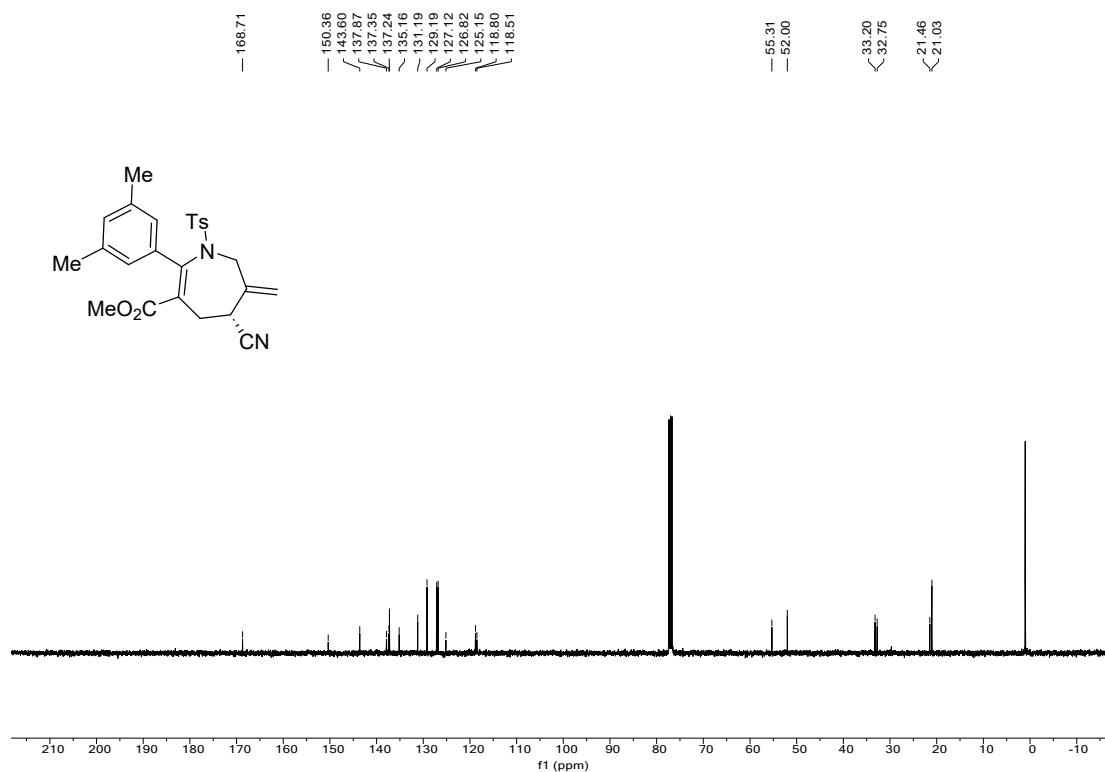

$^1\text{H}$  NMR of **3g** in  $\text{CDCl}_3$  (600 MHz)

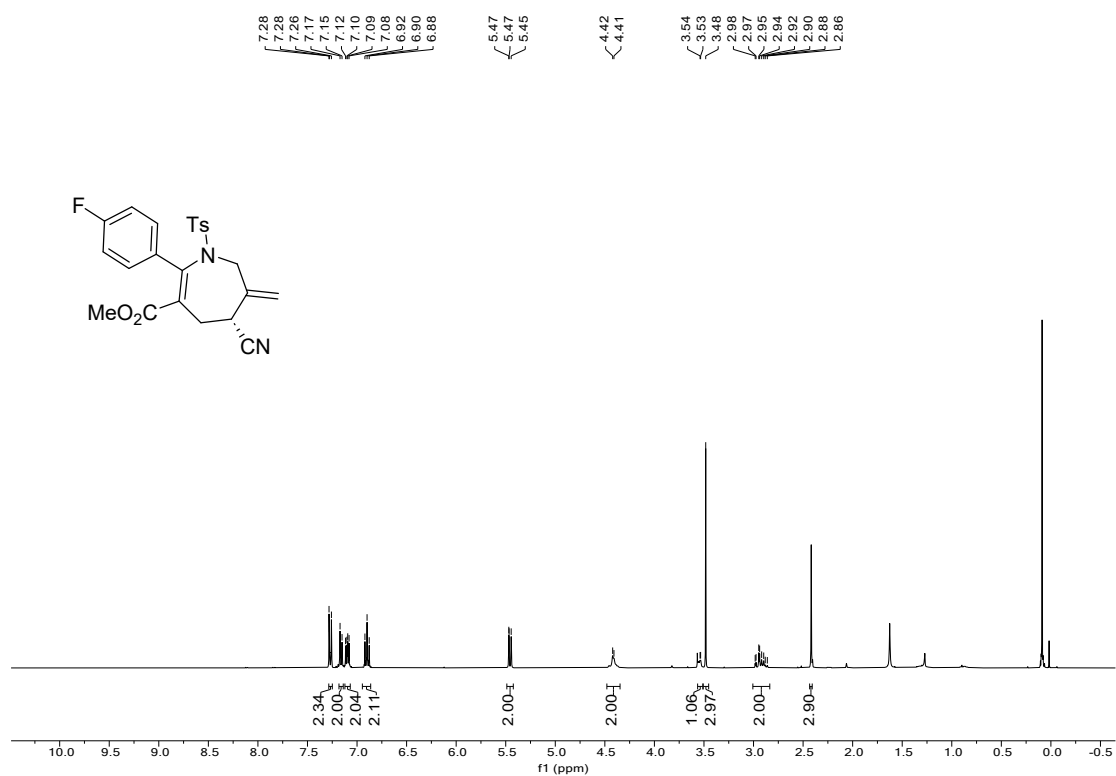

$^{13}\text{C}$  NMR of **3g** in  $\text{CDCl}_3$  (150 MHz)

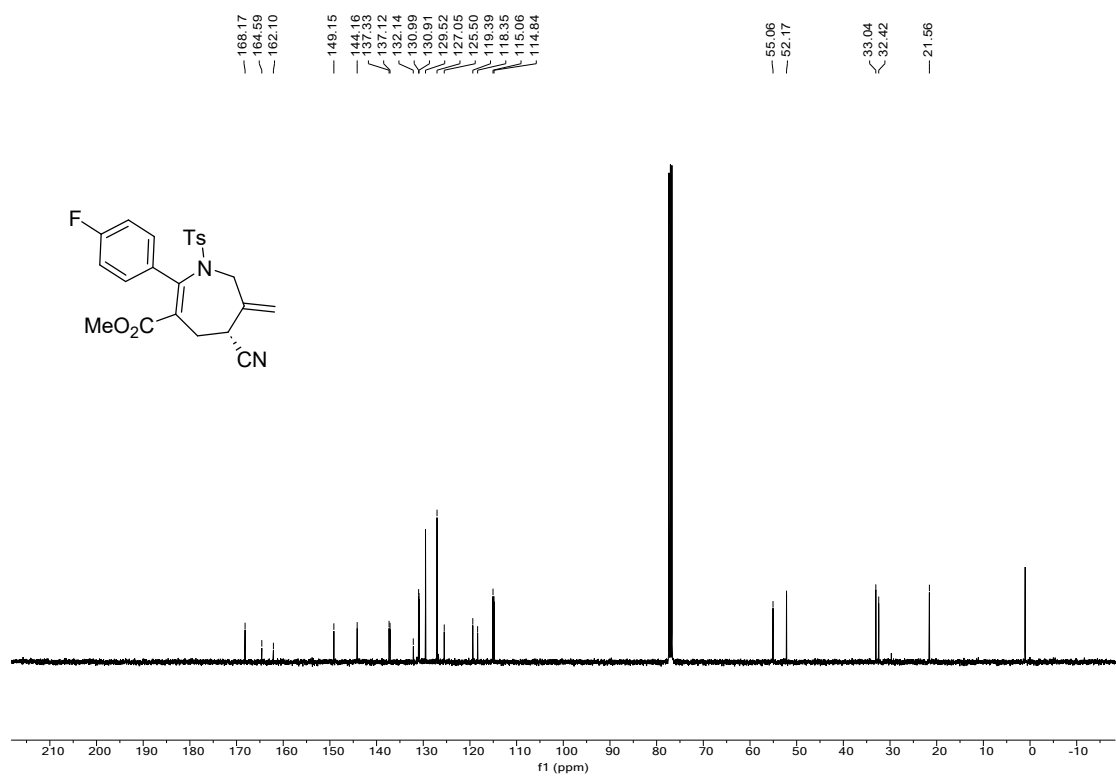

$^{19}\text{F}$  NMR of **3g** in  $\text{CDCl}_3$  (565 MHz)

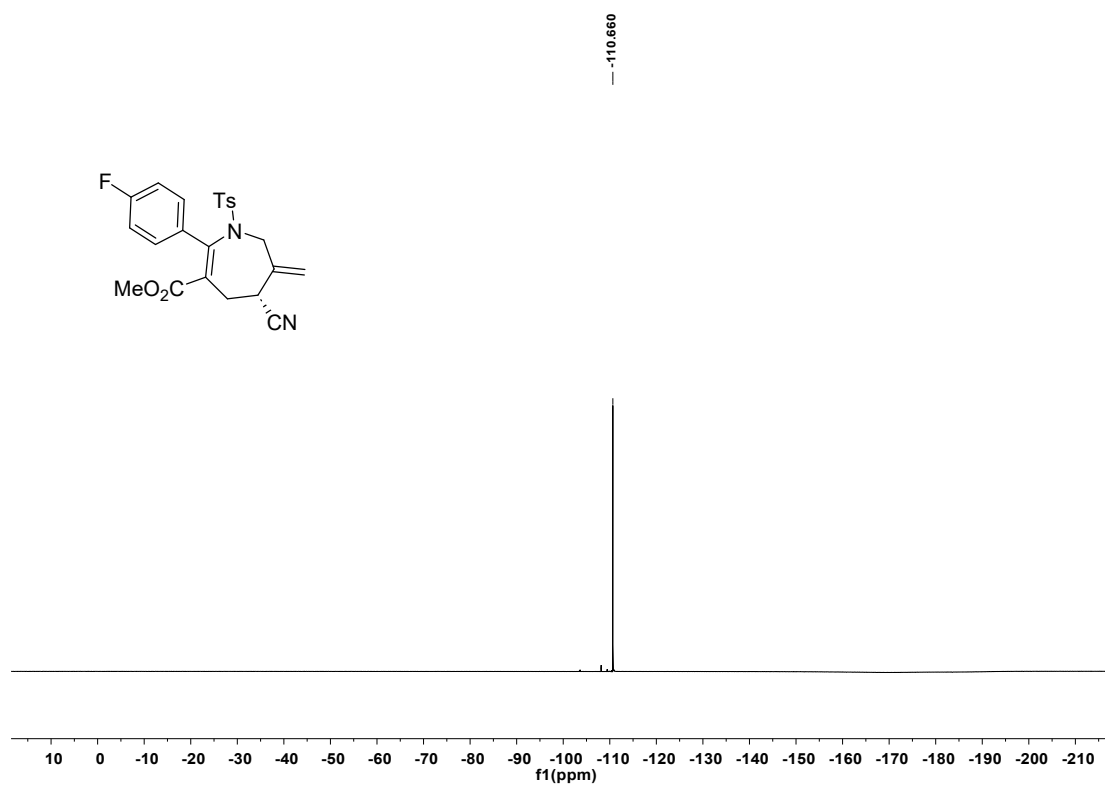

$^1\text{H}$  NMR of **3h** in  $\text{CDCl}_3$  (400 MHz)

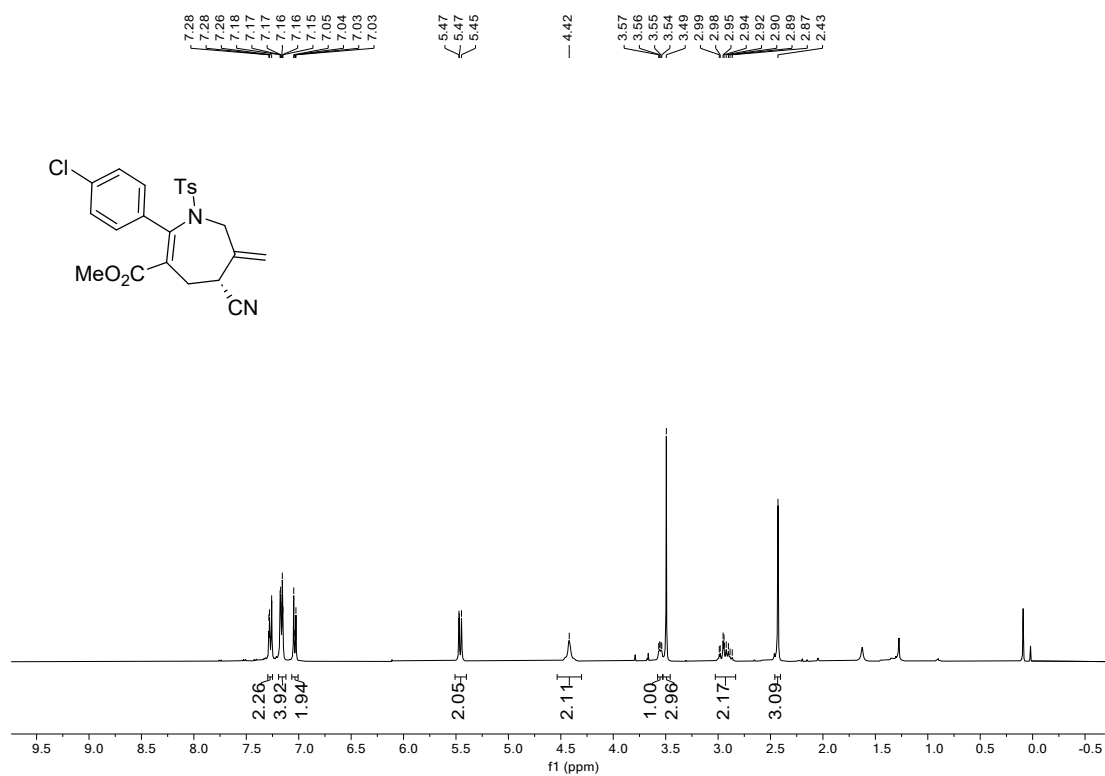

$^1\text{H}$  NMR of **3h** in  $\text{CDCl}_3$  (100 MHz)

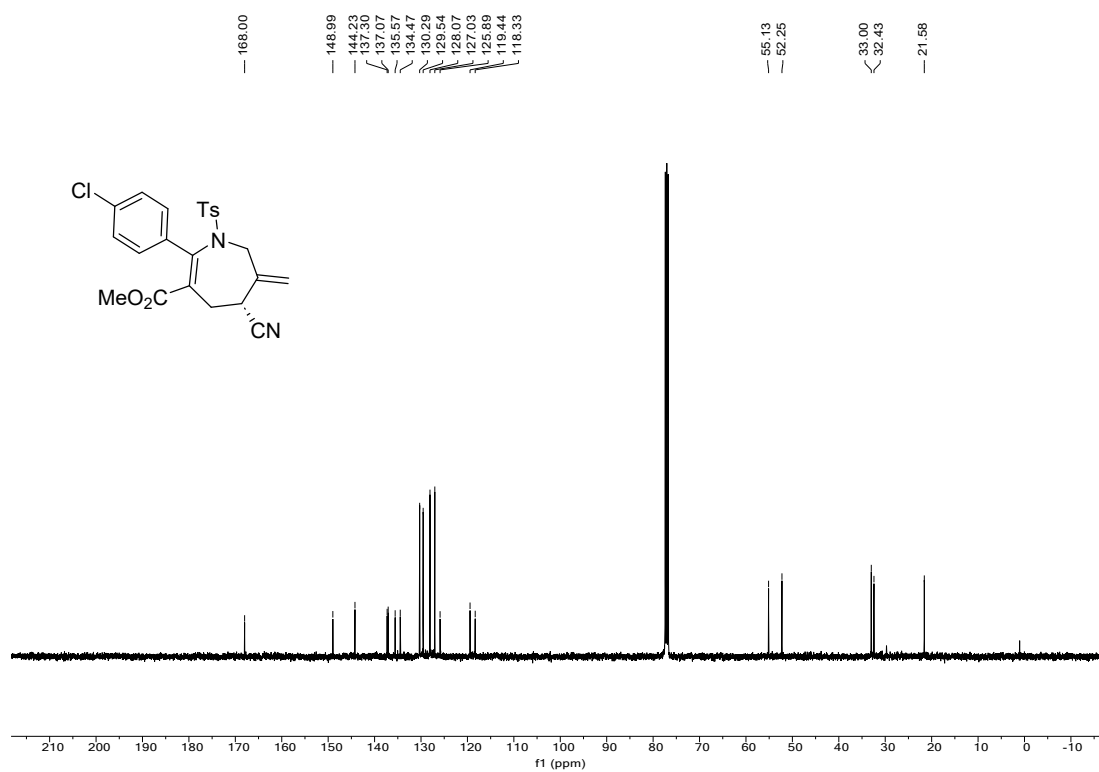

<sup>1</sup>H NMR of **3i** in CDCl<sub>3</sub> (600 MHz)

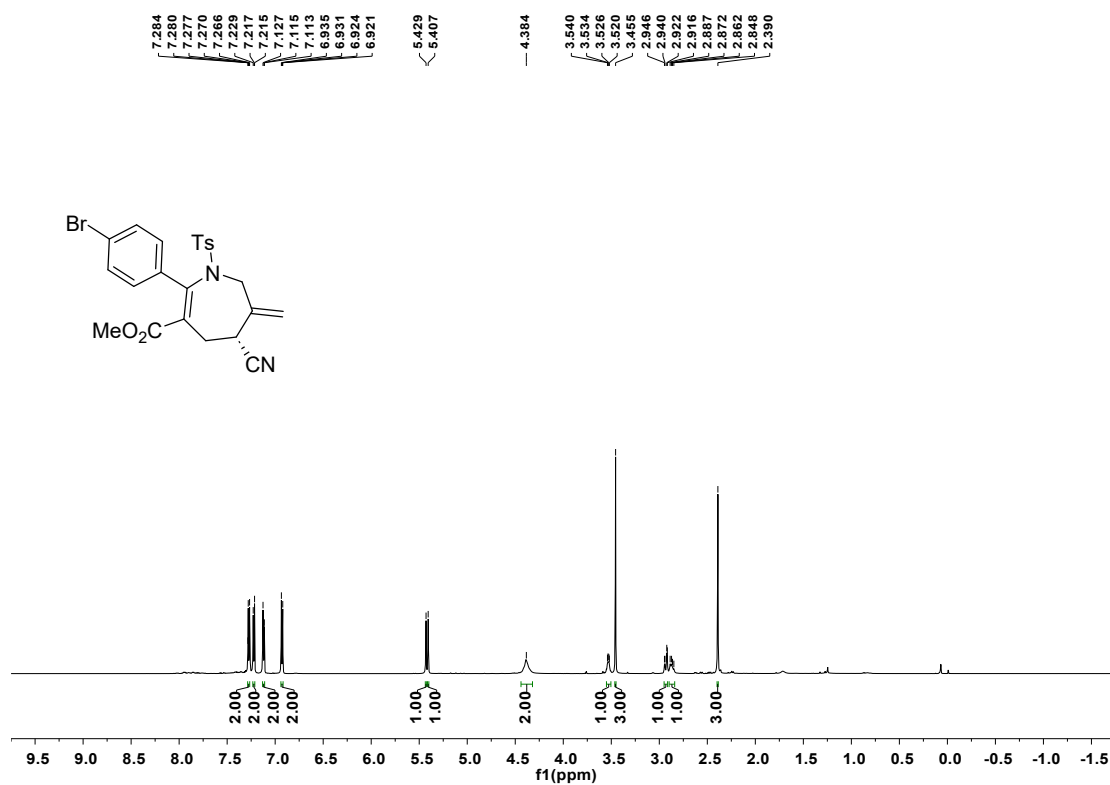

<sup>13</sup>C NMR of **3i** in CDCl<sub>3</sub> (150 MHz)

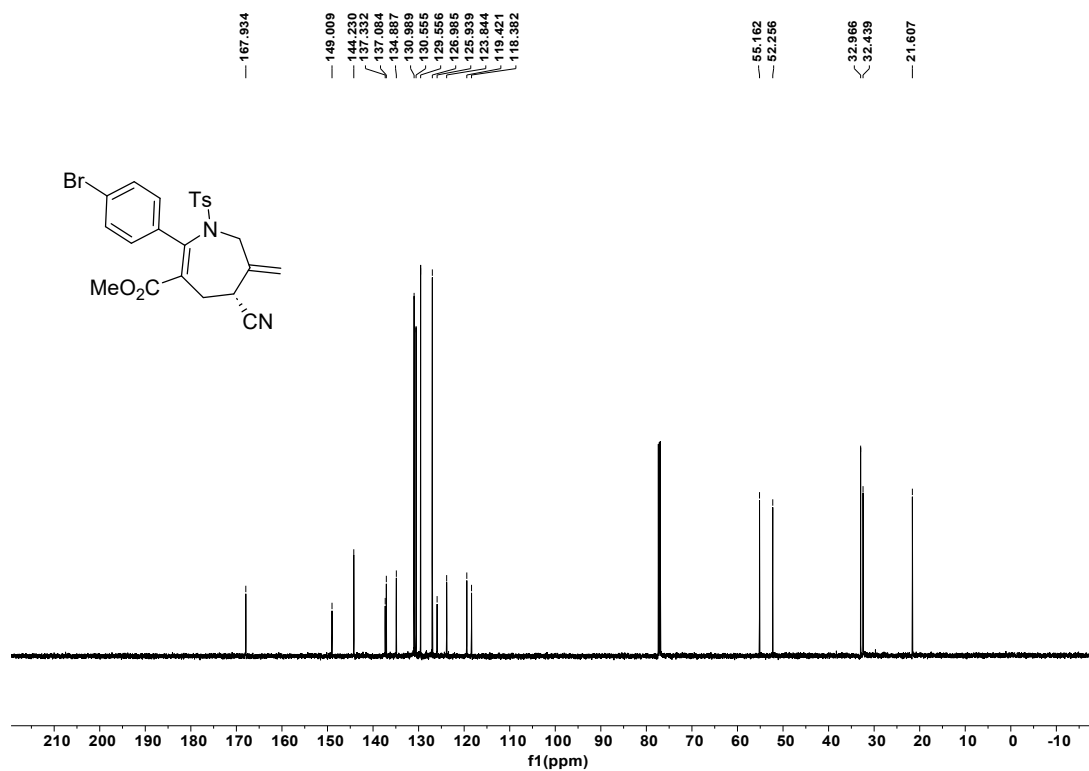



<sup>1</sup>H NMR of **3j** in CDCl<sub>3</sub> (600 MHz)

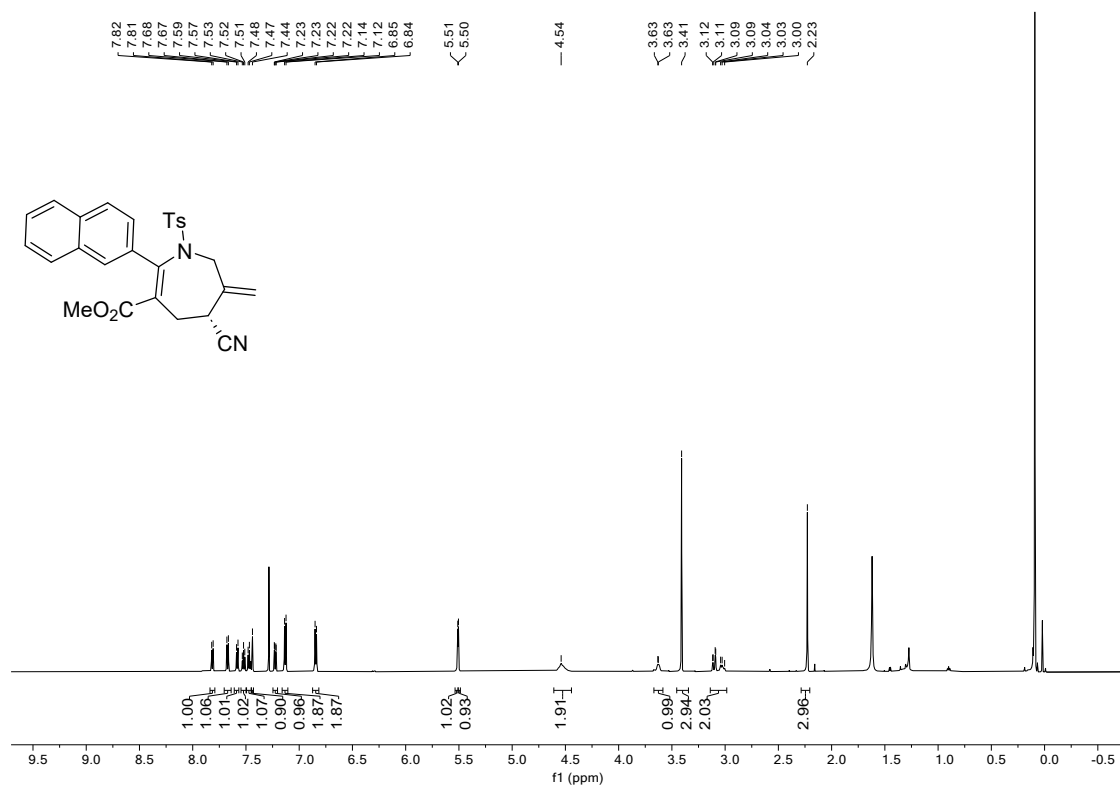

<sup>13</sup>C NMR of **3j** in CDCl<sub>3</sub> (150 MHz)

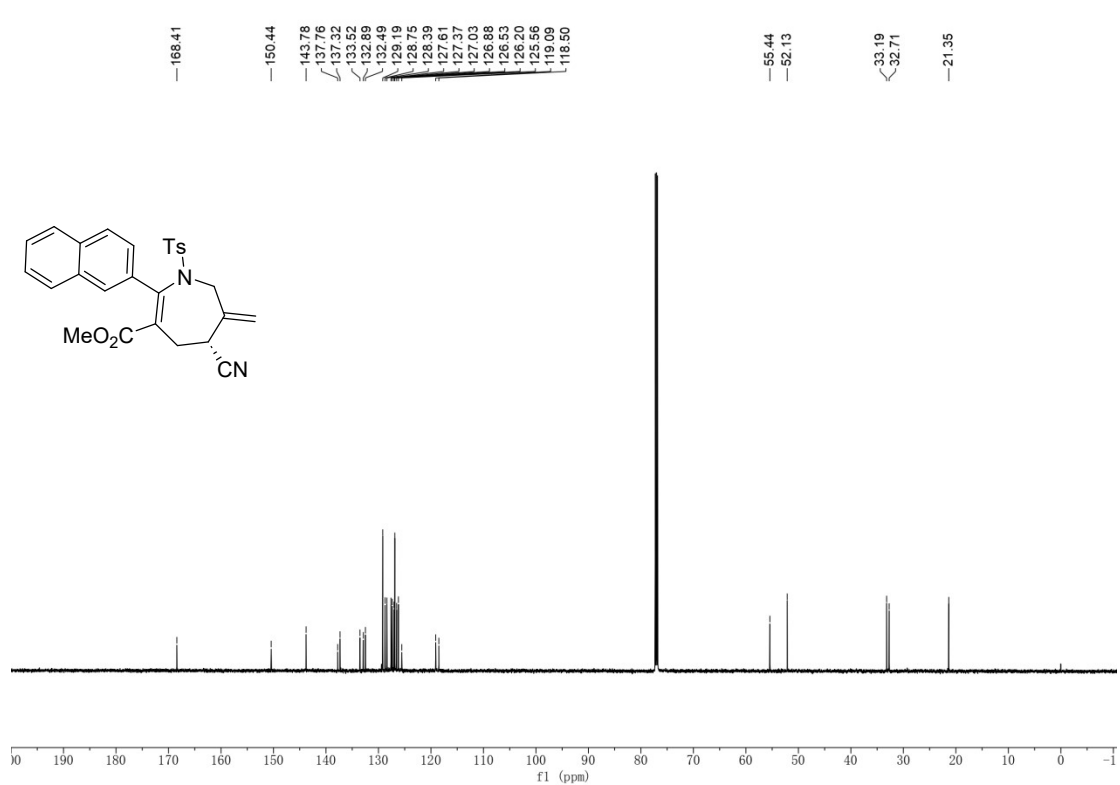

<sup>1</sup>H NMR of **3k** in CDCl<sub>3</sub> (600 MHz)

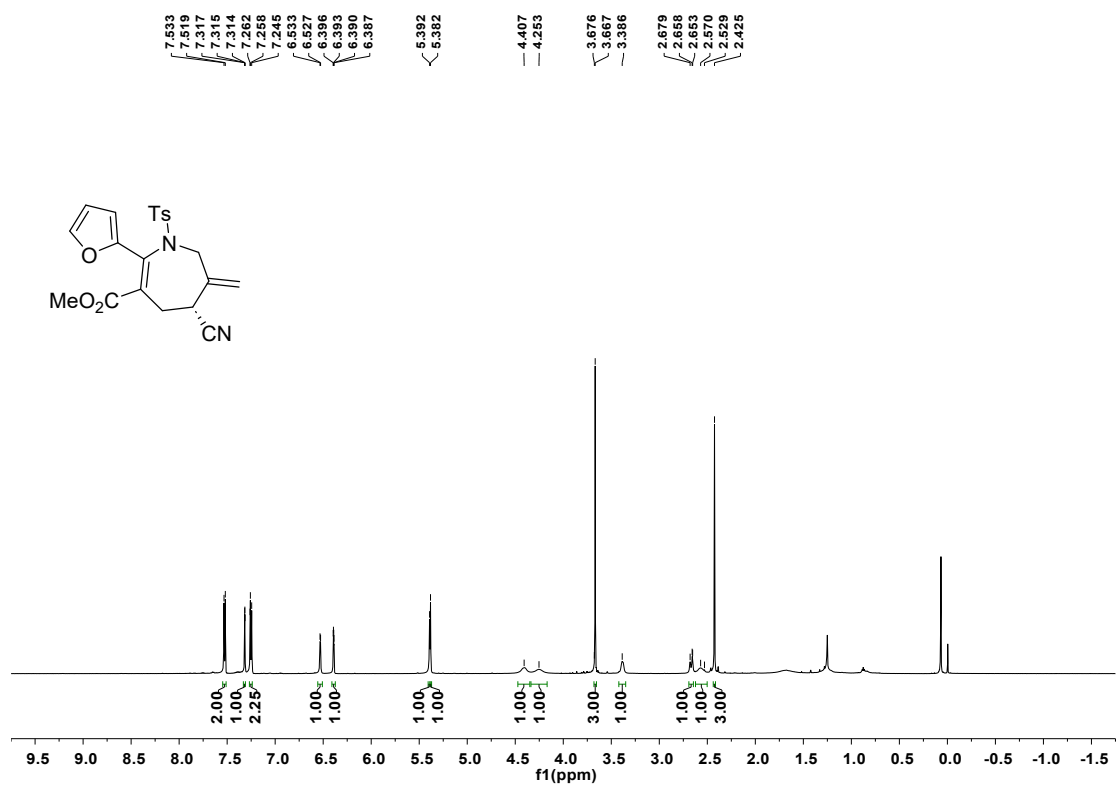

<sup>13</sup>C NMR of **3k** in CDCl<sub>3</sub> (150 MHz)

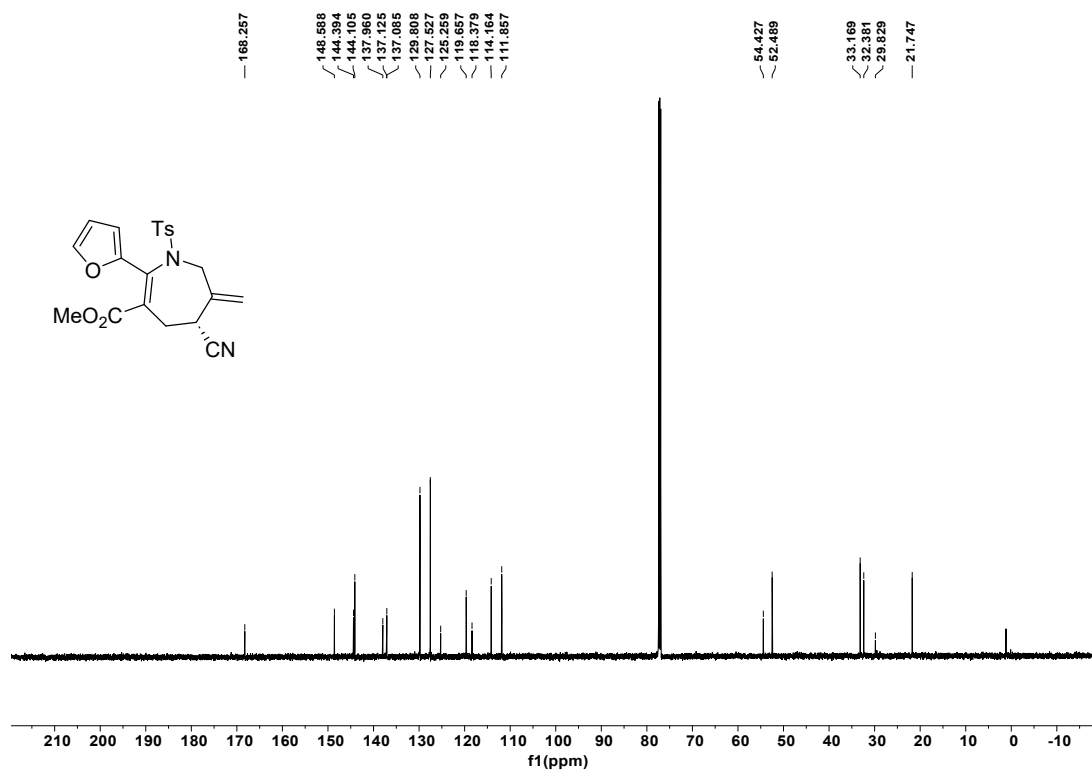

<sup>1</sup>H NMR of **31** in CDCl<sub>3</sub> (600 MHz)

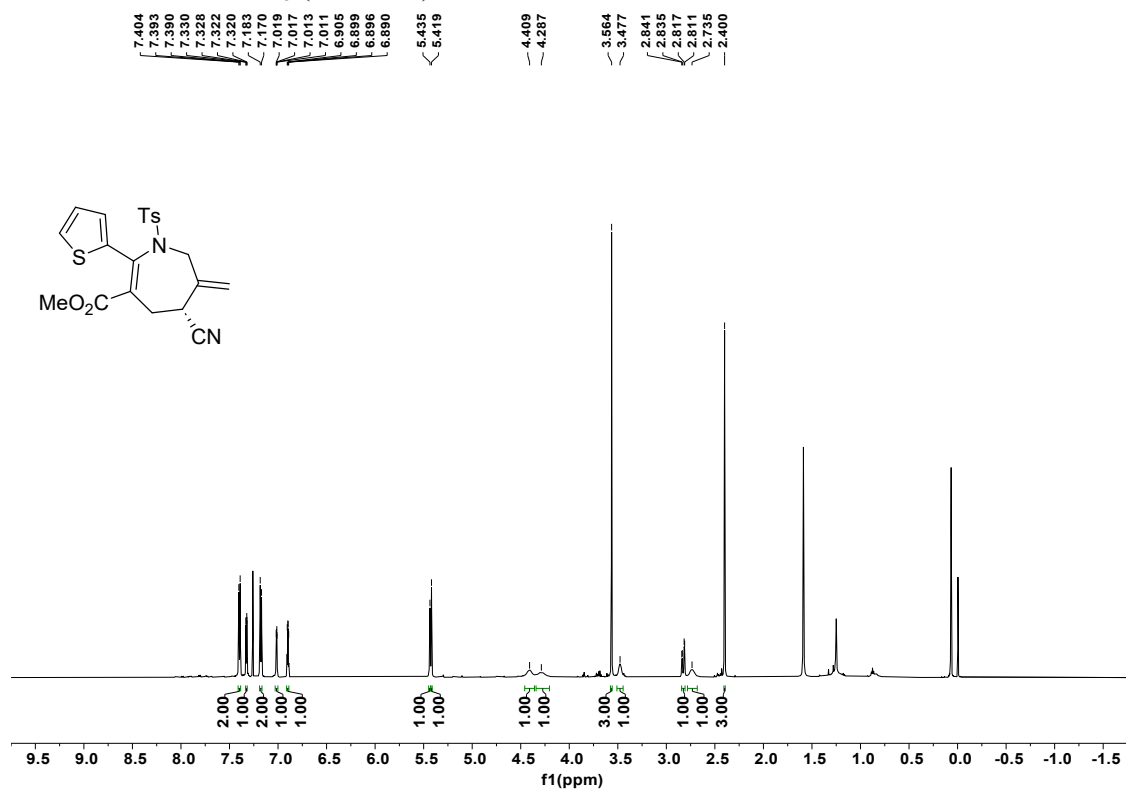

<sup>13</sup>C NMR of **31** in CDCl<sub>3</sub> (150 MHz)

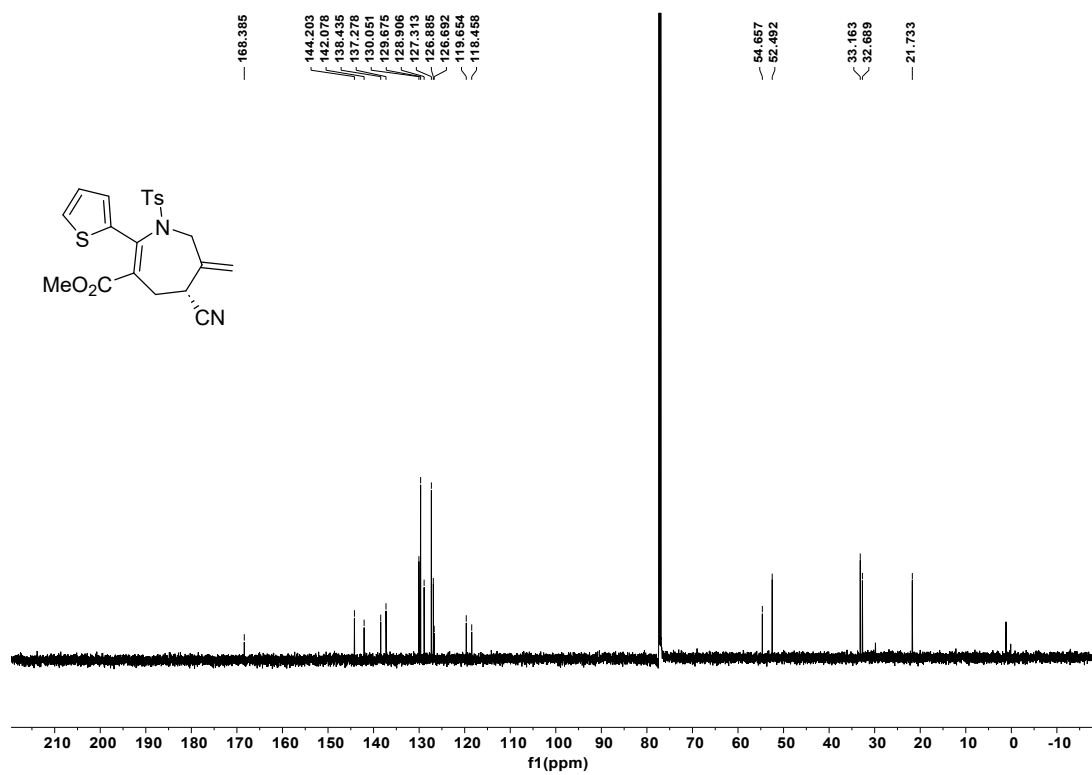

<sup>1</sup>H NMR of **3m** in CDCl<sub>3</sub> (600 MHz)

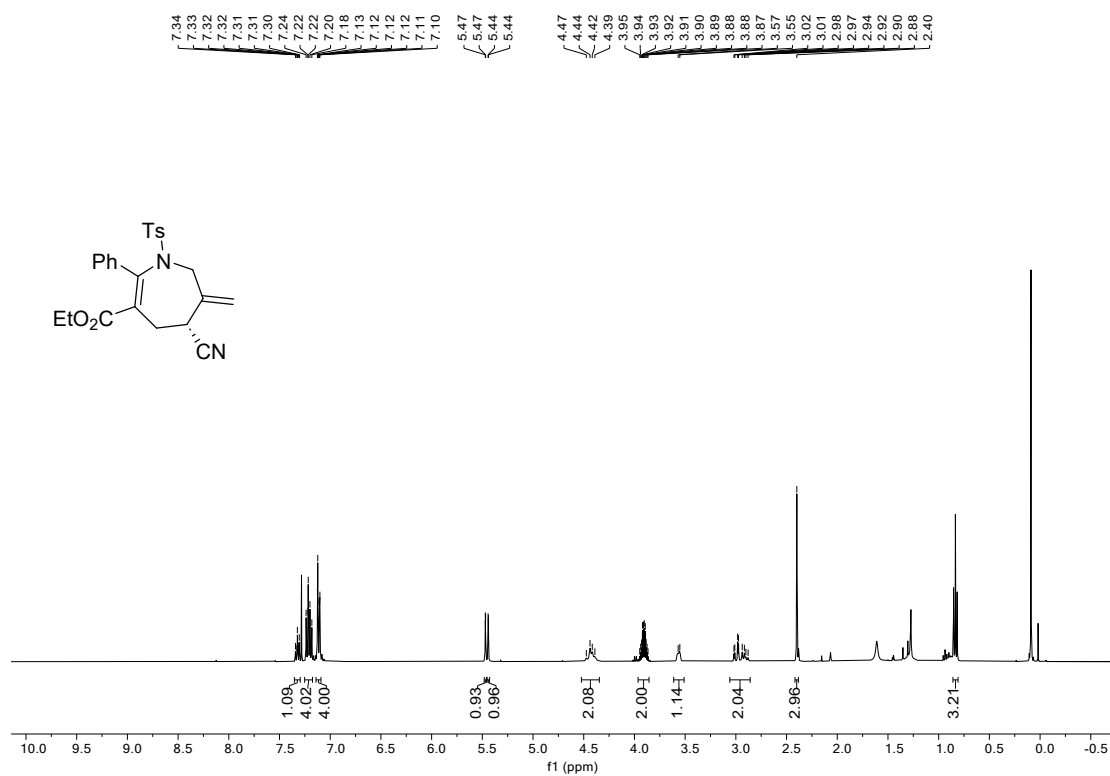

<sup>13</sup>C NMR of **3m** in CDCl<sub>3</sub> (150 MHz)

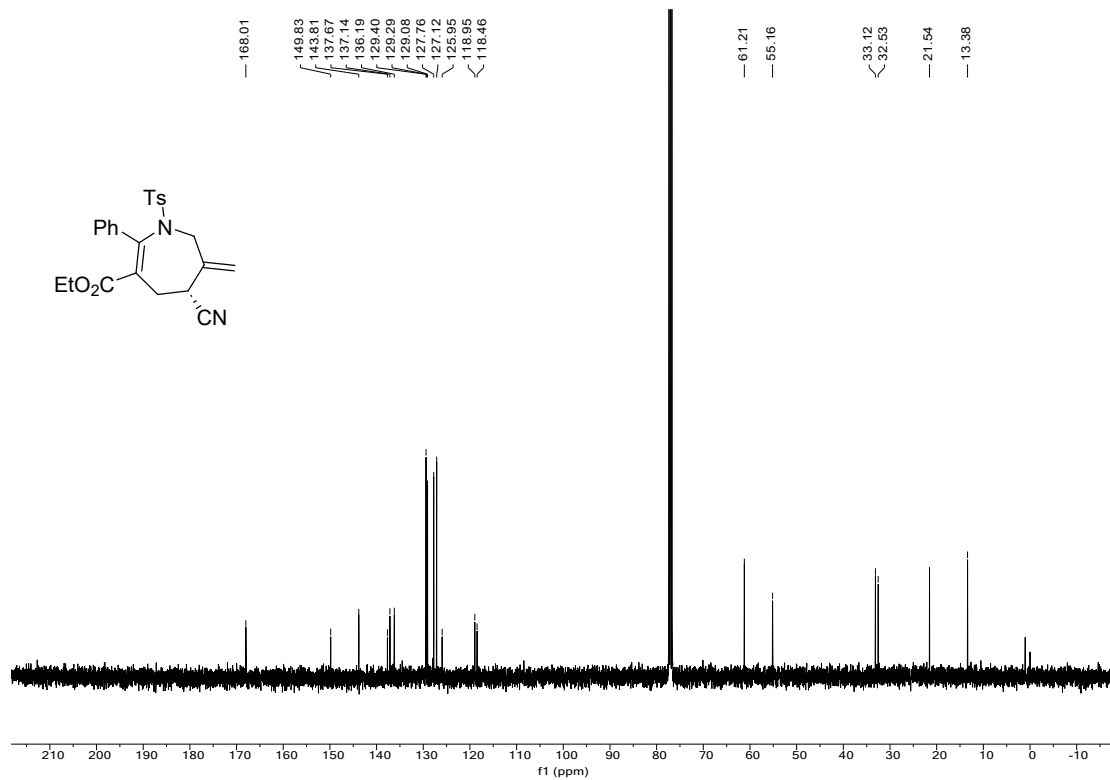

$^1\text{H}$  NMR of **3n** in  $\text{CDCl}_3$  (600 MHz)

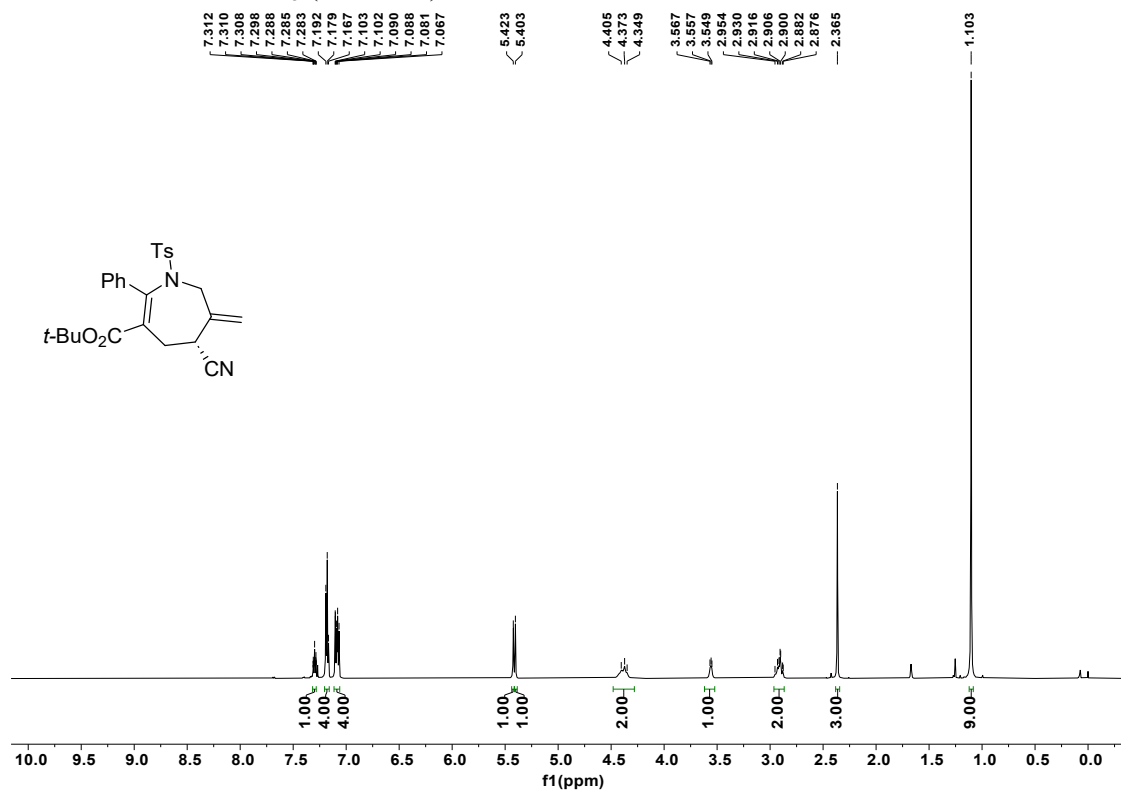

$^{13}\text{C}$  NMR of **3n** in  $\text{CDCl}_3$  (150 MHz)

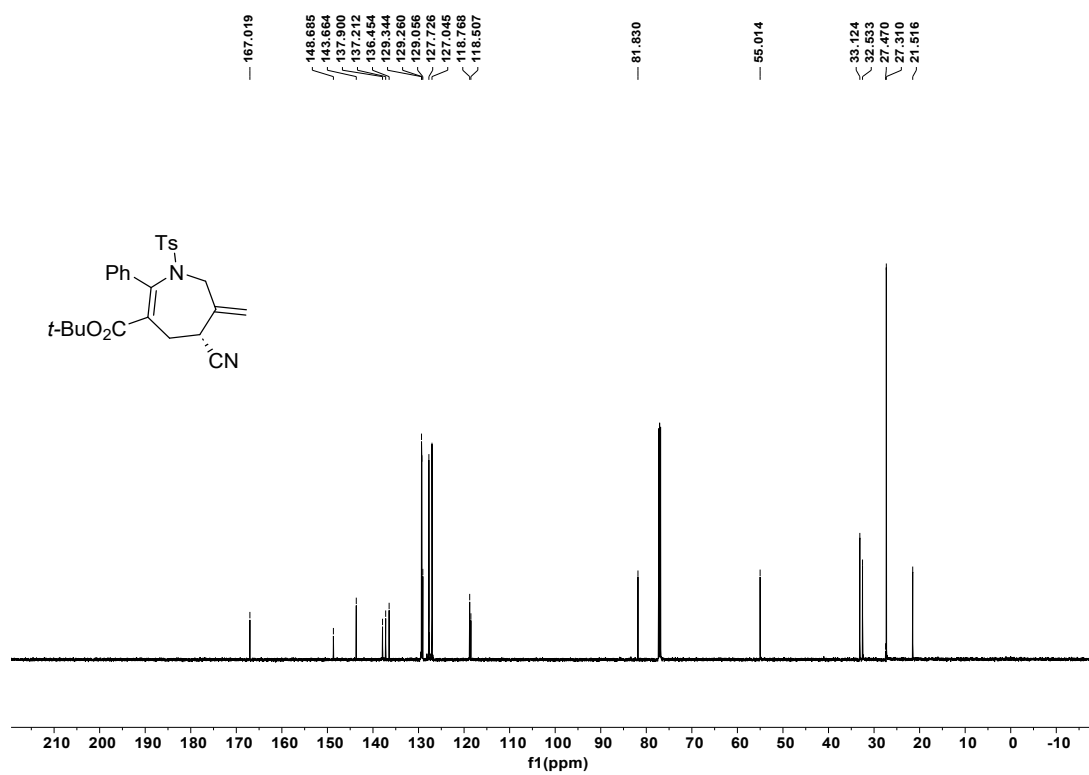

$^1\text{H}$  NMR of **3o** in  $\text{CDCl}_3$  (400 MHz)

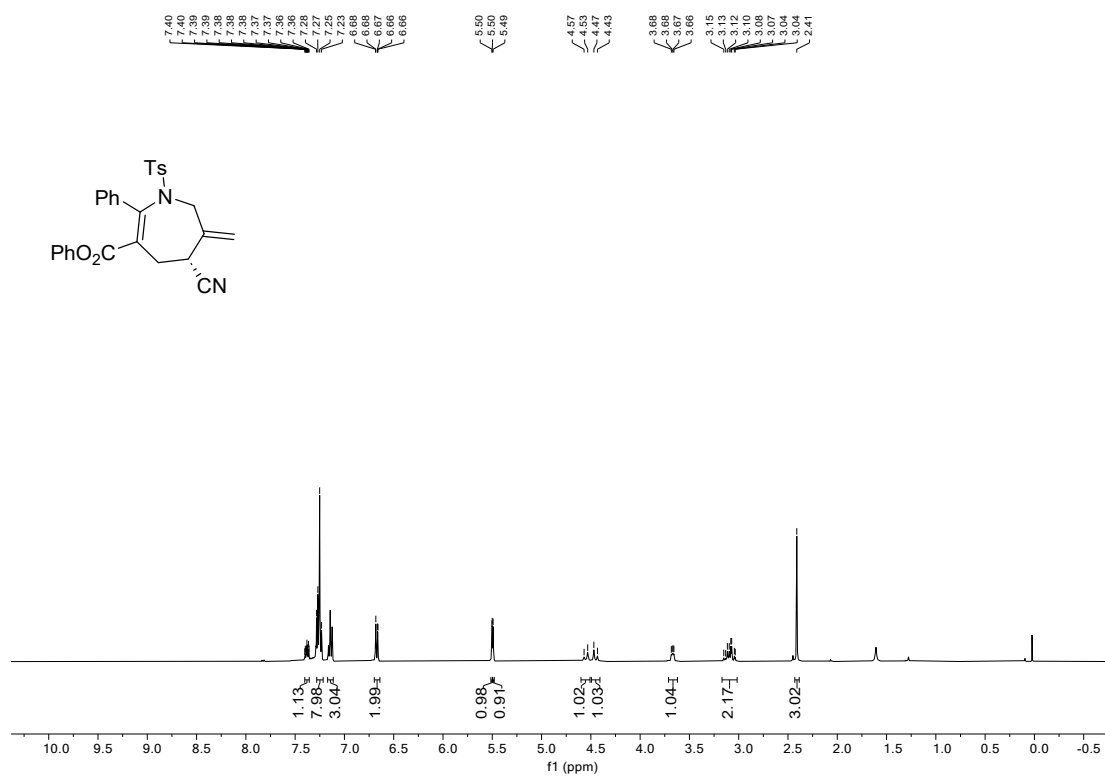

$^{13}\text{C}$  NMR of **3o** in  $\text{CDCl}_3$  (100 MHz)

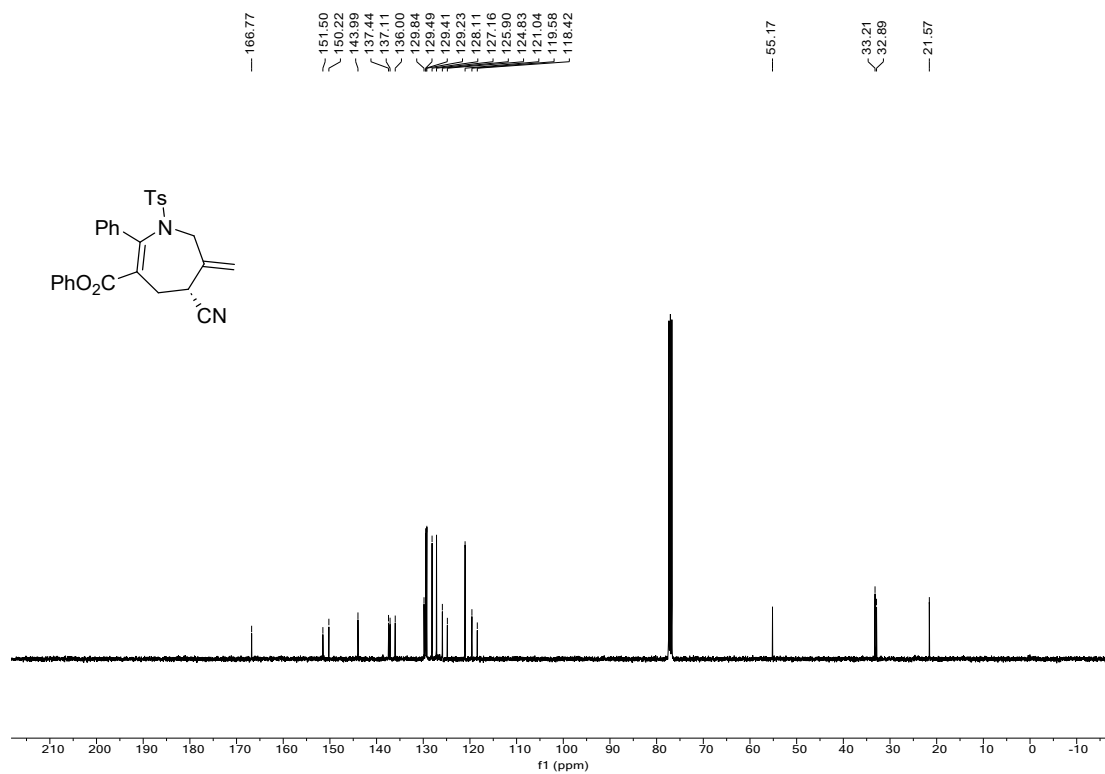

$^1\text{H}$  NMR of **3p** in  $\text{CDCl}_3$  (600 MHz)

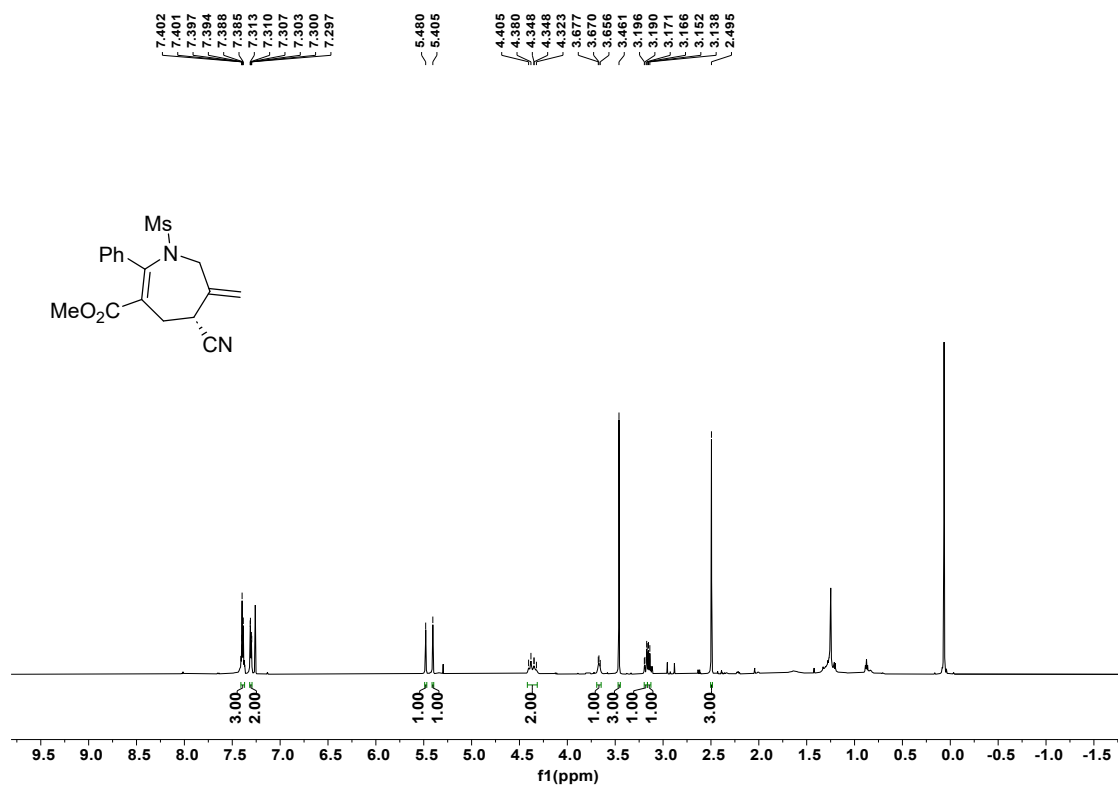

$^{13}\text{C}$  NMR of **3p** in  $\text{CDCl}_3$  (150 MHz)

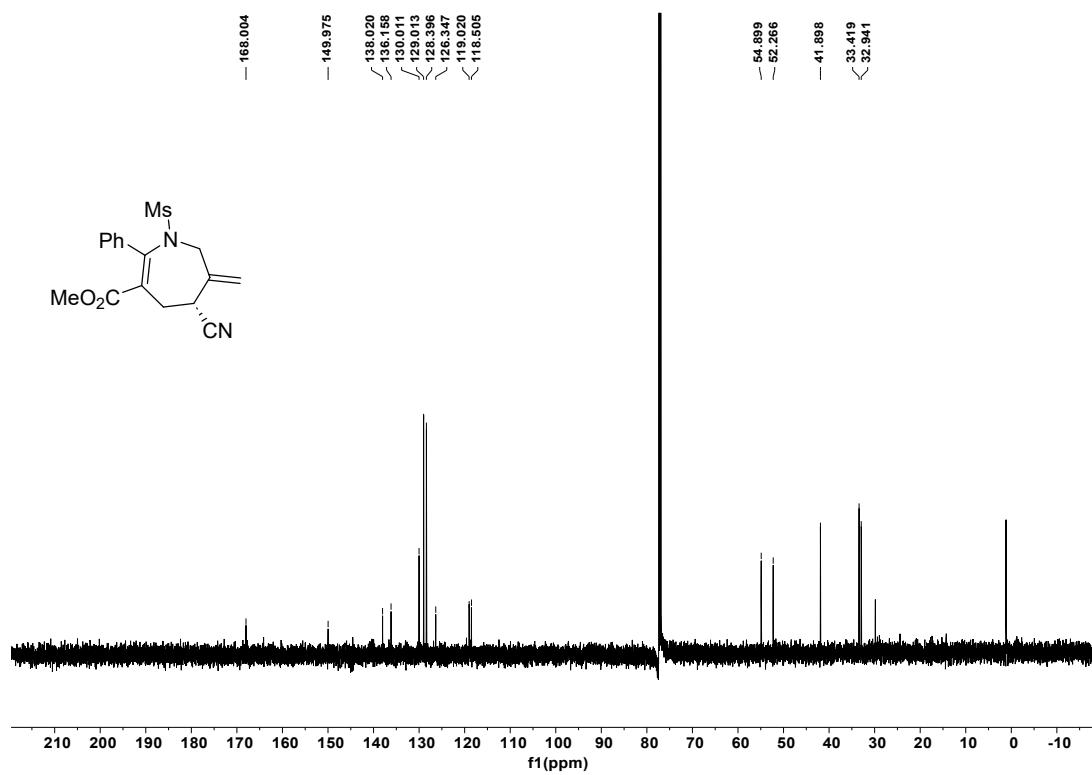

<sup>1</sup>H NMR of **3q** in CDCl<sub>3</sub> (400 MHz)

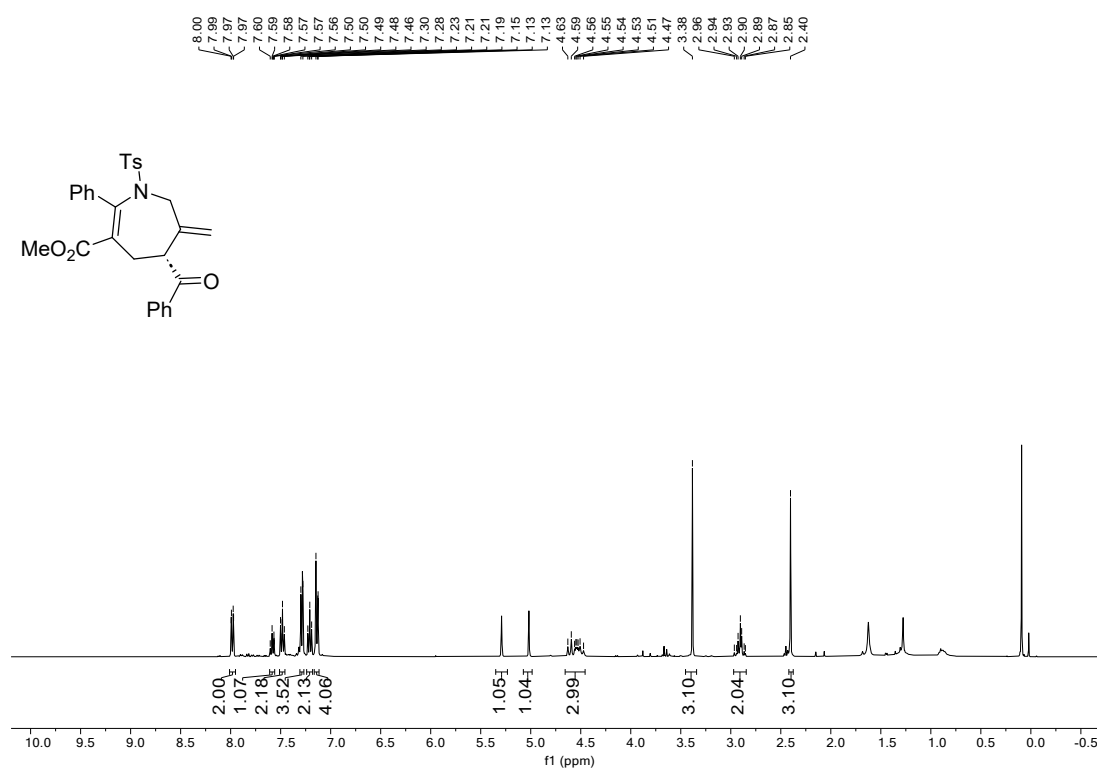

<sup>13</sup>C NMR of **3q** in CDCl<sub>3</sub> (150 MHz)

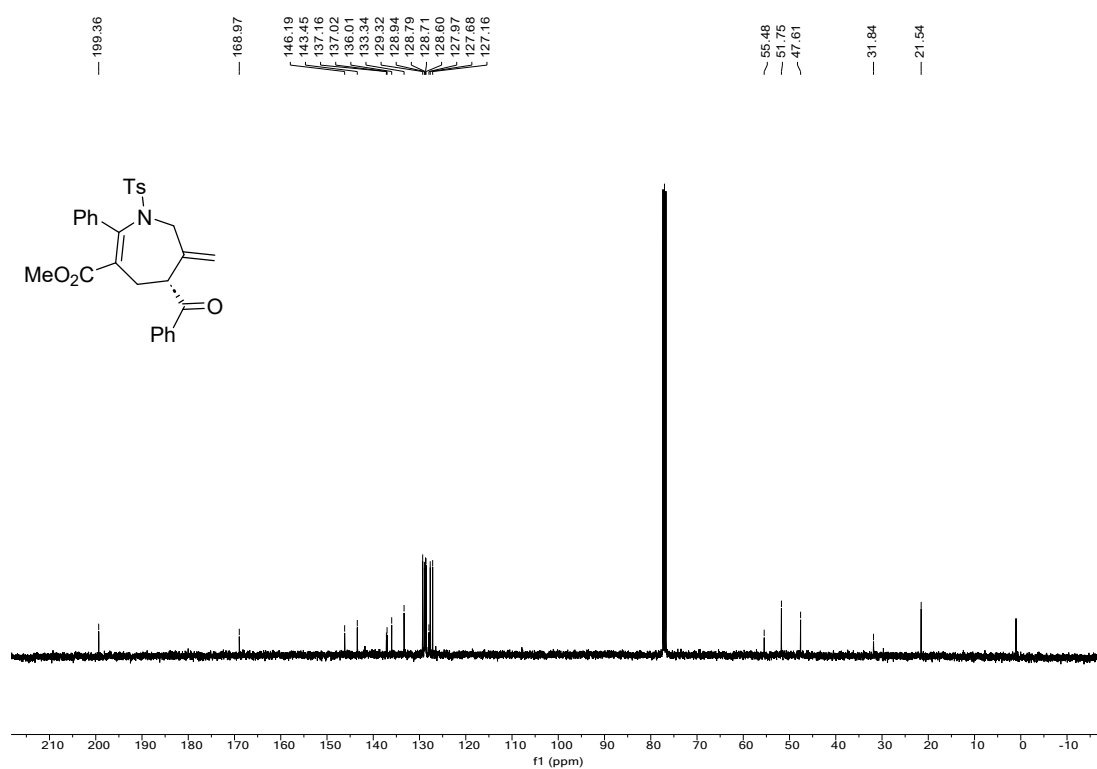



<sup>1</sup>H NMR of **3r** in CDCl<sub>3</sub> (600 MHz)

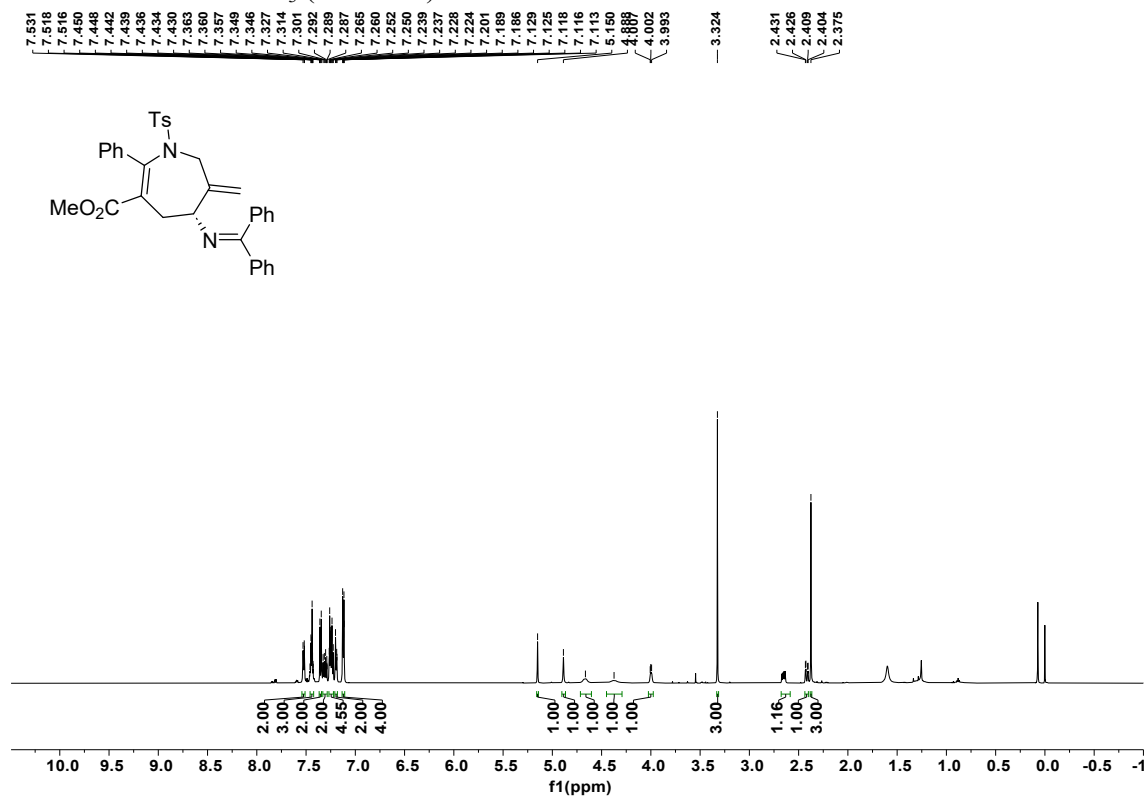

<sup>13</sup>C NMR of **3r** in CDCl<sub>3</sub> (150 MHz)

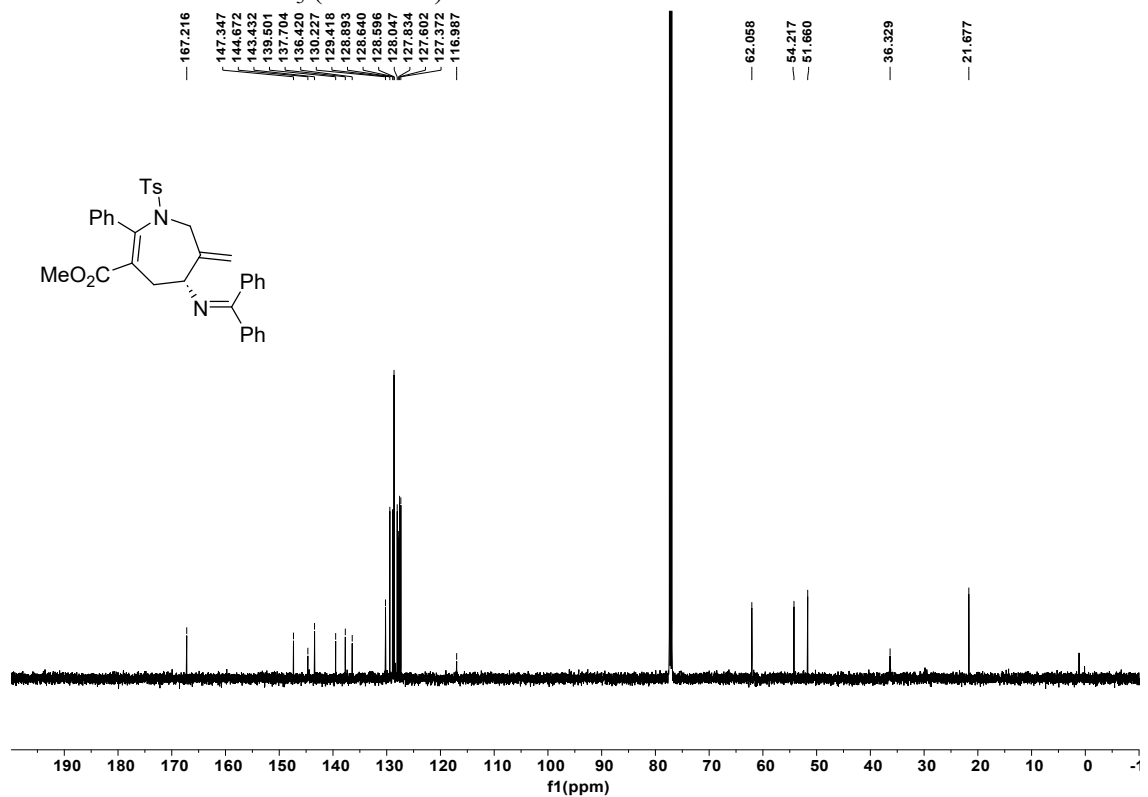

$^1\text{H}$  NMR of **3s** in  $\text{CDCl}_3$  (400 MHz)

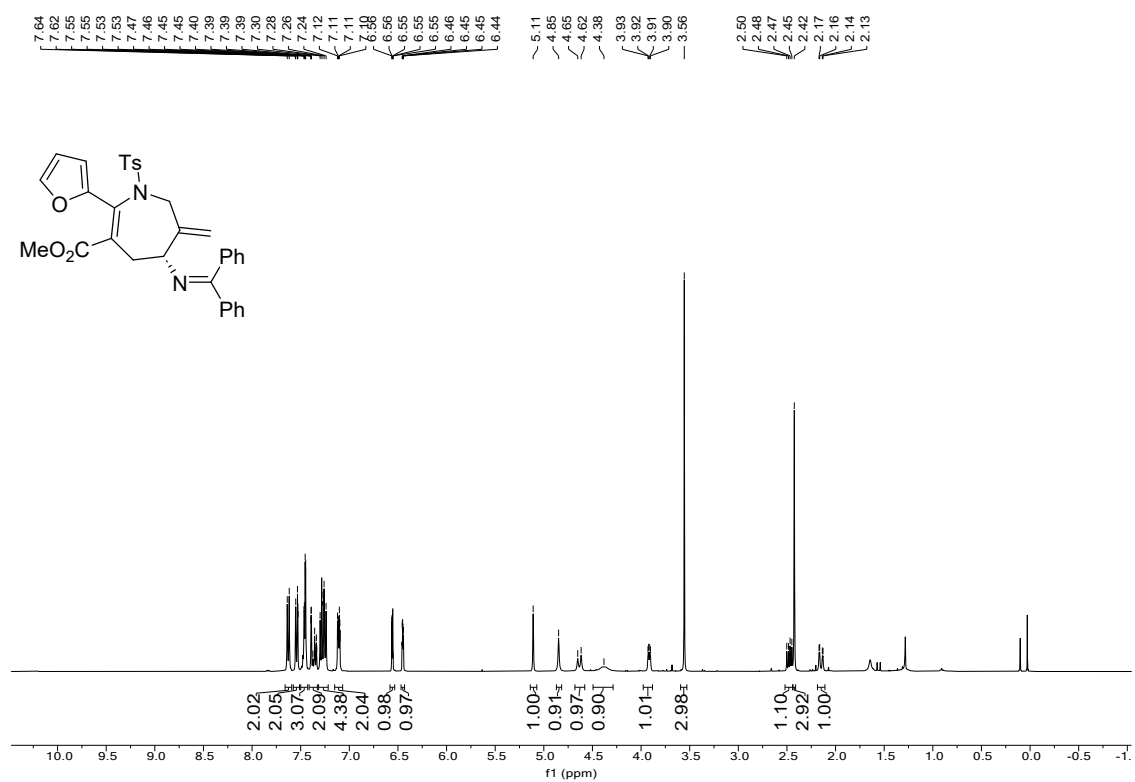

$^{13}\text{C}$  NMR of **3s** in  $\text{CDCl}_3$  (100 MHz)

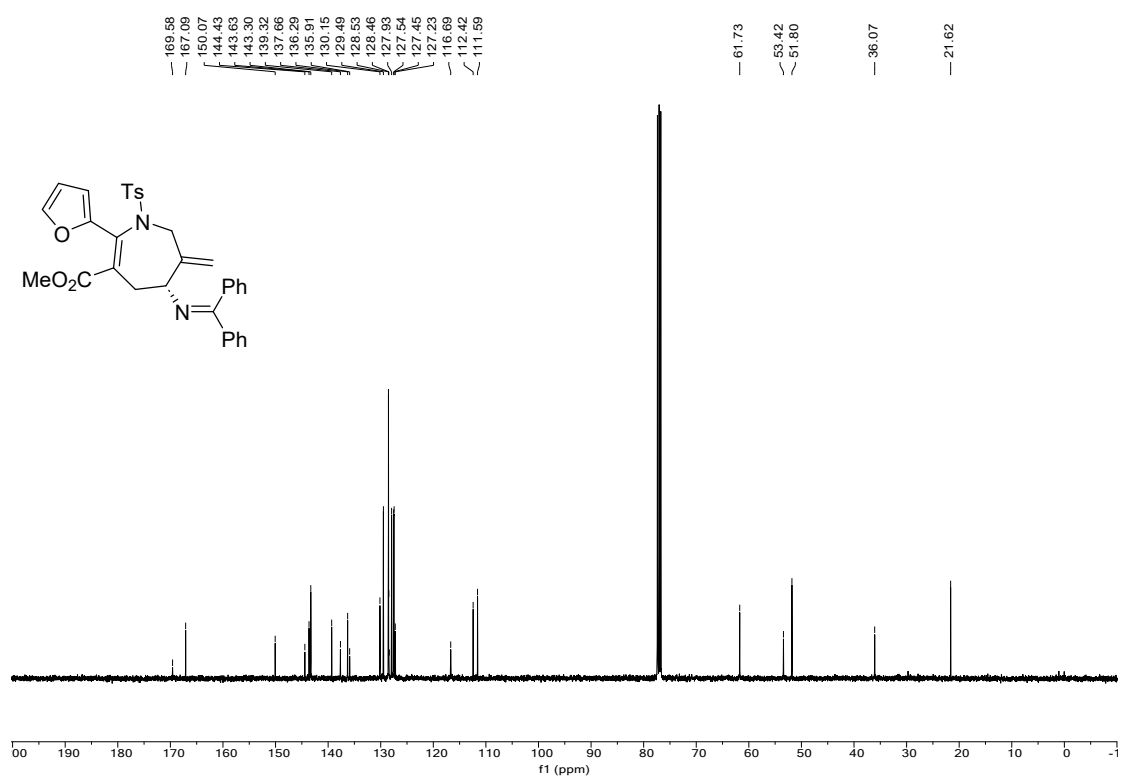

<sup>1</sup>H NMR of **4** in CDCl<sub>3</sub> (400 MHz)

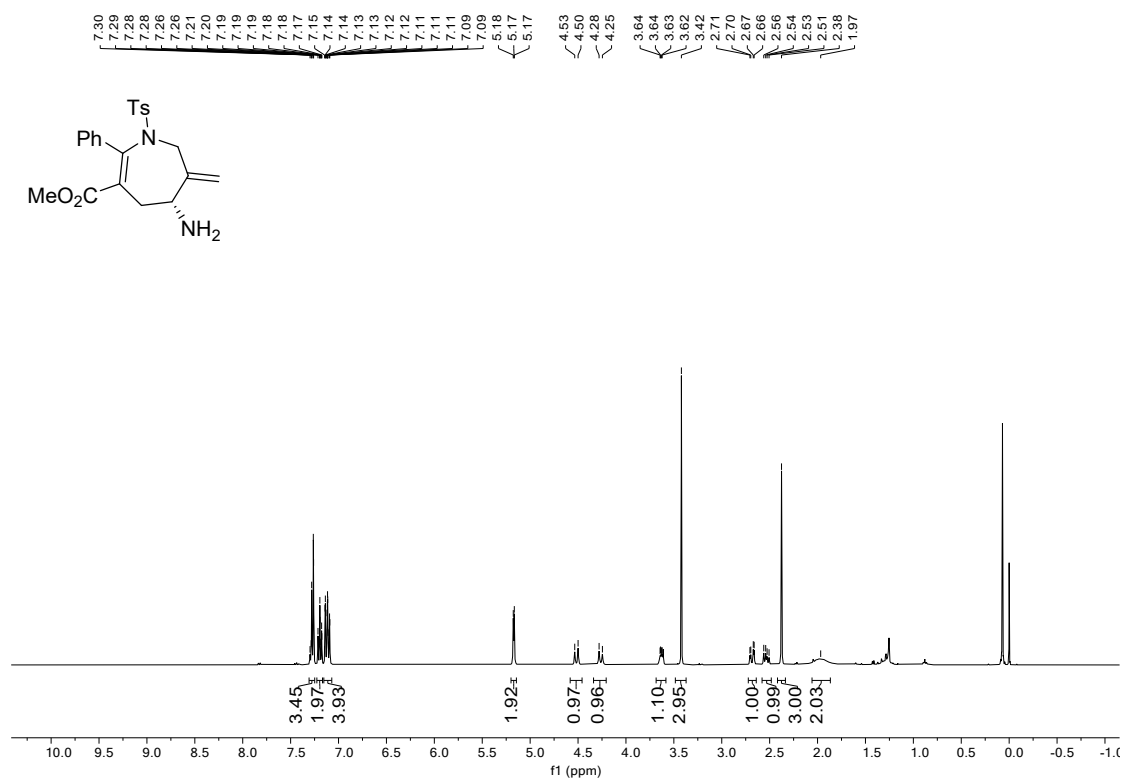

<sup>13</sup>C NMR of **4** in CDCl<sub>3</sub> (100 MHz)

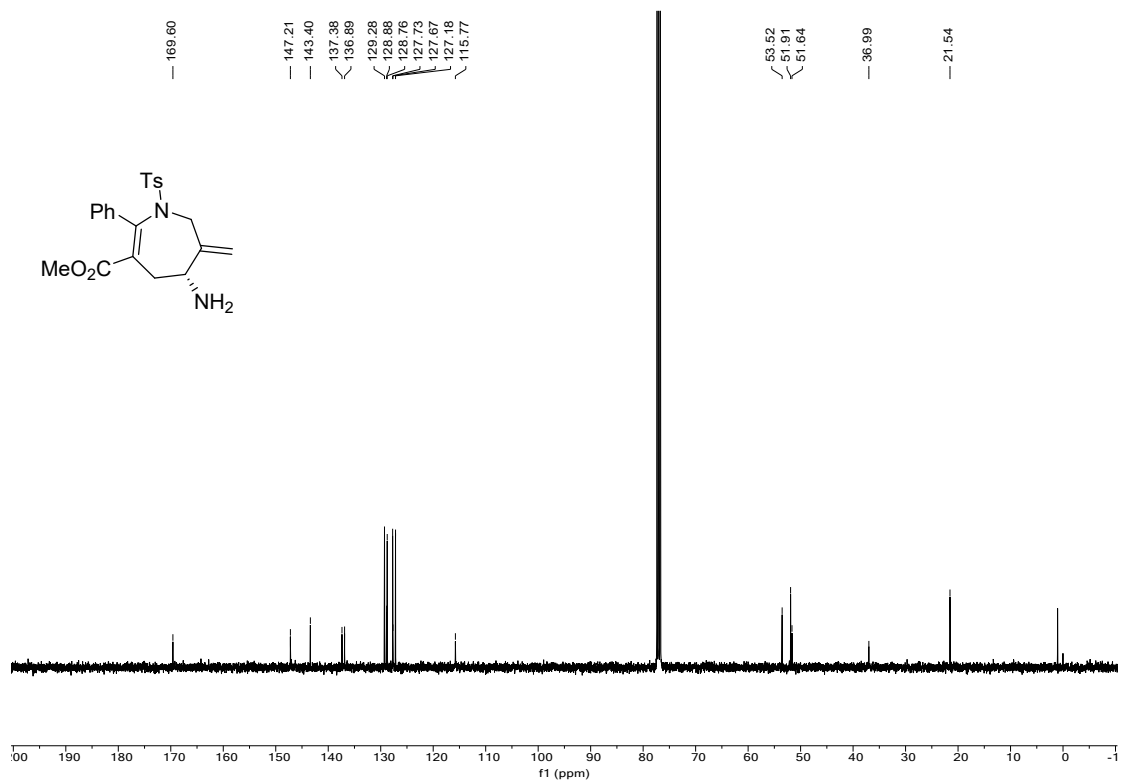

## 7 HPLC chromatograms

HPLC chromatogram of compound **3a** (96% ee)

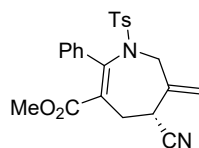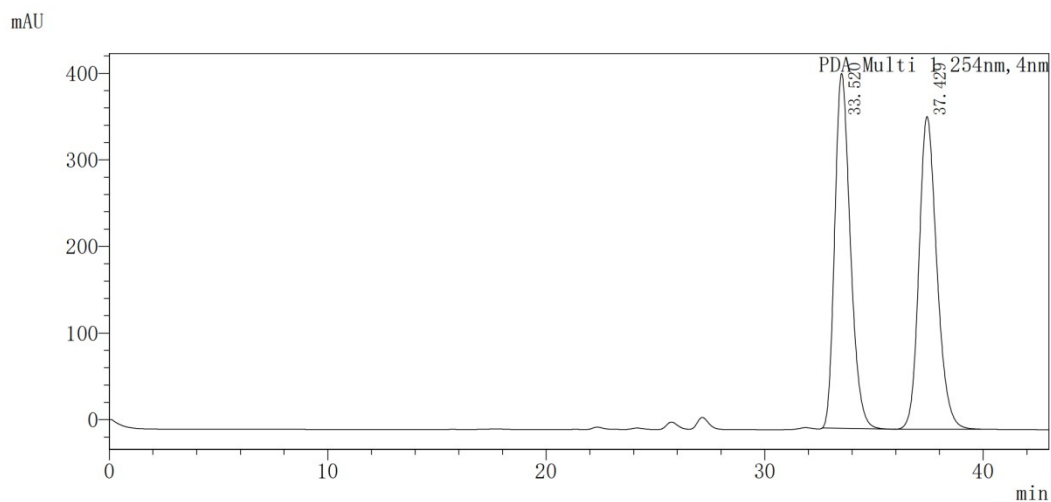

<Peak table>

PDA Ch1 254nm

| Peak  | Area     | Height | Area%   | Ret.time |
|-------|----------|--------|---------|----------|
| 1     | 20305396 | 409660 | 49.681  | 33.520   |
| 2     | 20565792 | 361224 | 50.319  | 37.429   |
| Total | 40871188 | 770884 | 100.000 |          |

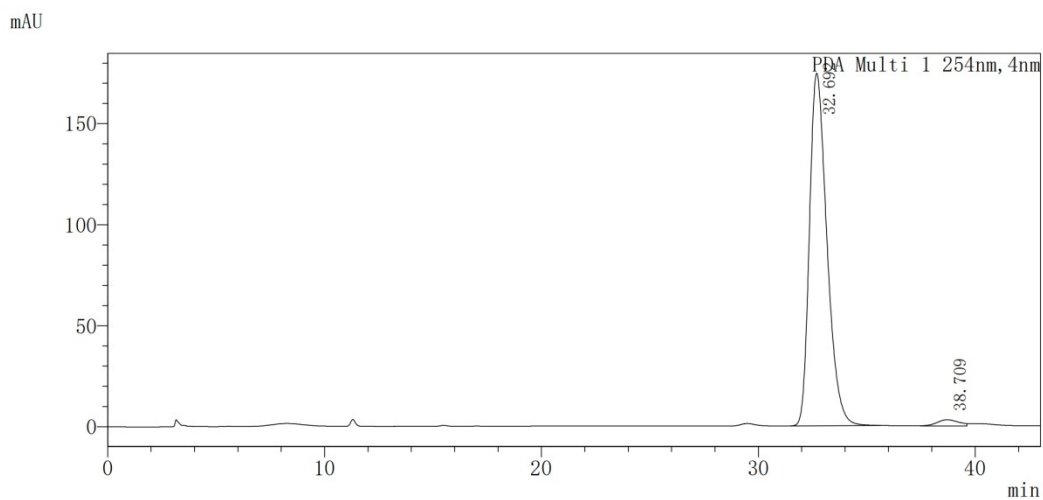

<Peak table>

PDA Ch1 254nm

| Peak  | Area    | Height | Area%   | Ret.time |
|-------|---------|--------|---------|----------|
| 1     | 9776892 | 174503 | 97.907  | 32.692   |
| 2     | 209003  | 3025   | 2.093   | 38.709   |
| Total | 9985895 | 177528 | 100.000 |          |

HPLC chromatogram of compound **3b** (96% *ee*)

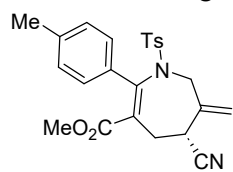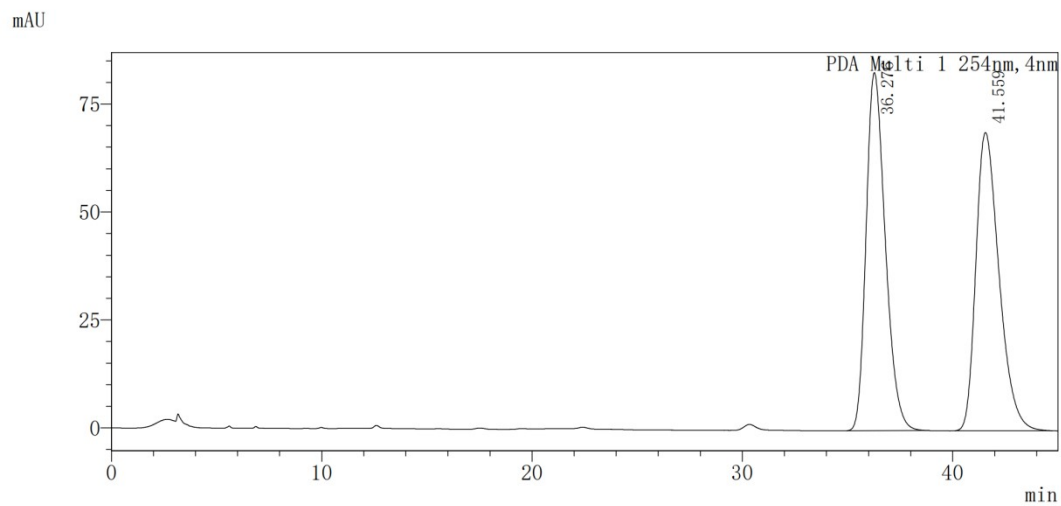

<Peak table>

PDA Ch1 254nm

| Peak  | Area     | Height | Area%   | Ret.time |
|-------|----------|--------|---------|----------|
| 1     | 5261274  | 82908  | 49.883  | 36.276   |
| 2     | 5285965  | 69048  | 50.117  | 41.559   |
| Total | 10547238 | 151955 | 100.000 |          |

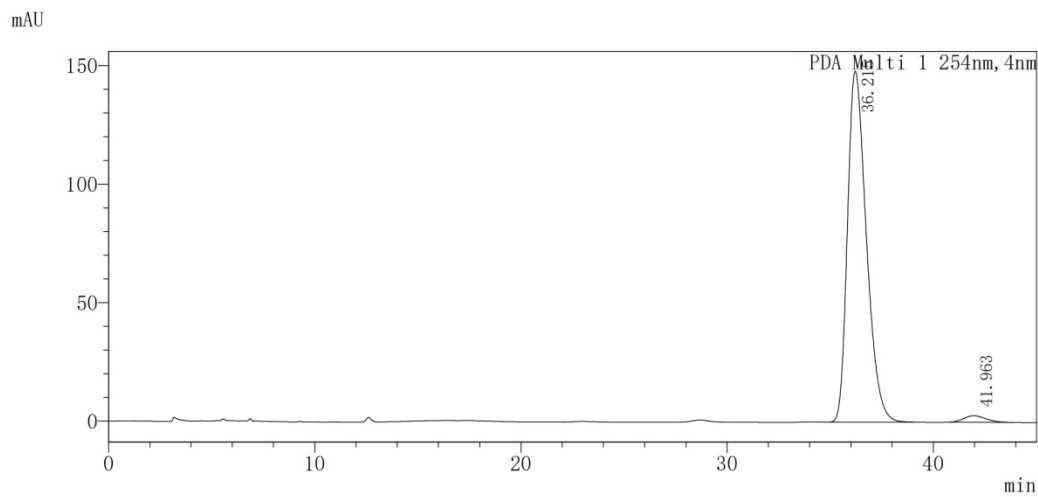

<Peak table>

PDA Ch1 254nm

| Peak  | Area    | Height | Area%   | Ret.time |
|-------|---------|--------|---------|----------|
| 1     | 9425823 | 148110 | 97.905  | 36.215   |
| 2     | 201660  | 2719   | 2.095   | 41.963   |
| Total | 9627483 | 150830 | 100.000 |          |

HPLC chromatogram of compound **3c** (97% *ee*)

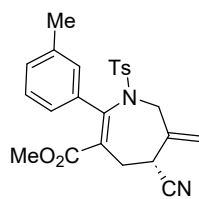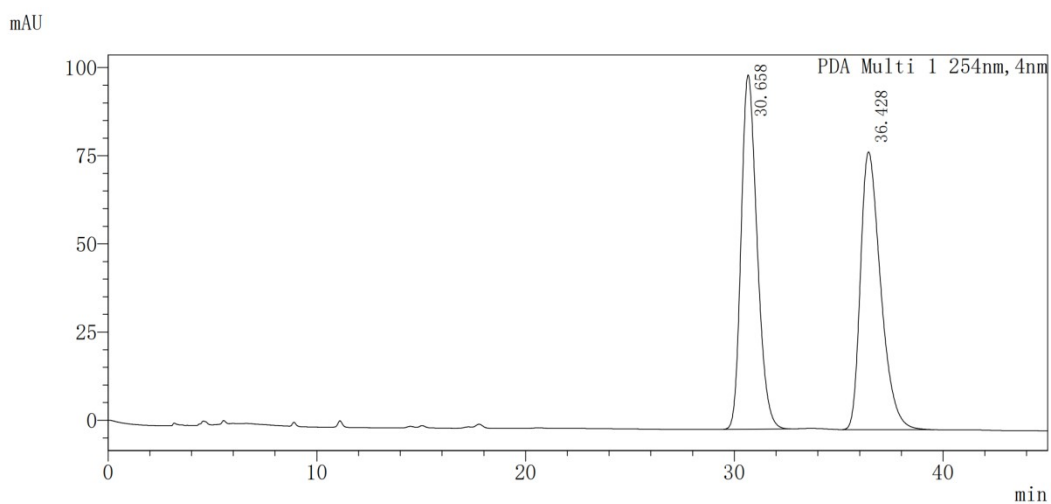

<Peak table>

PDA Ch1 254nm

| Peak  | Area     | Height | Area%   | Ret.time |
|-------|----------|--------|---------|----------|
| 1     | 5322845  | 100454 | 50.102  | 30.658   |
| 2     | 5301241  | 78749  | 49.898  | 36.428   |
| Total | 10624086 | 179204 | 100.000 |          |

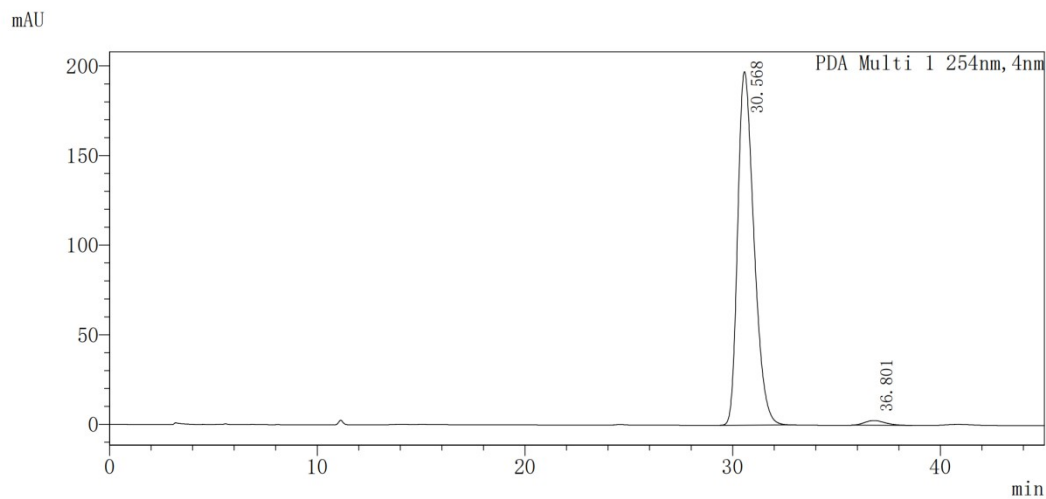

<Peak table>

PDA Ch1 254nm

| Peak  | Area     | Height | Area%   | Ret.time |
|-------|----------|--------|---------|----------|
| 1     | 10725630 | 197284 | 98.349  | 30.568   |
| 2     | 180077   | 2620   | 1.651   | 36.801   |
| Total | 10905707 | 199904 | 100.000 |          |

HPLC chromatogram of compound **3d** (95% *ee*)

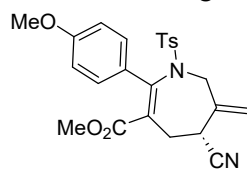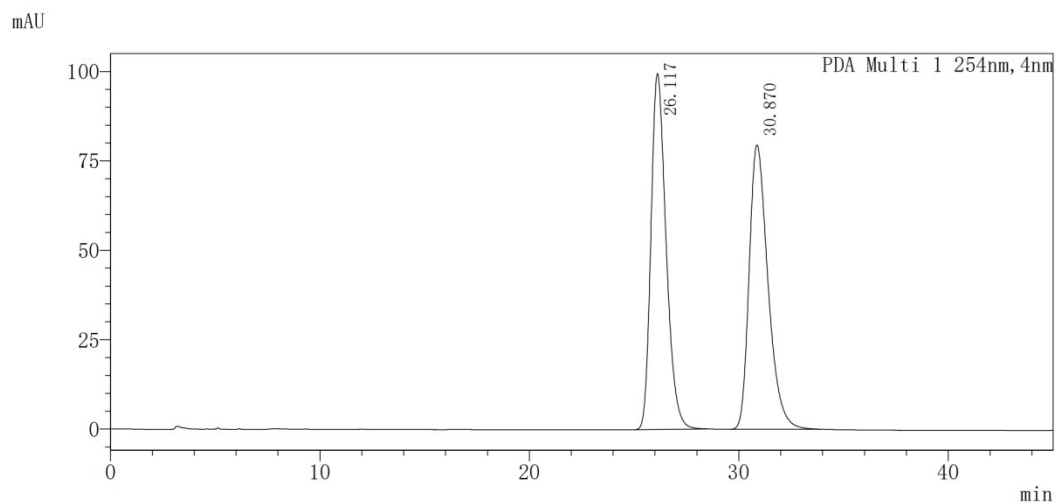

<Peak table>

PDA Ch1 254nm

| Peak  | Area    | Height | Area%   | Ret.time |
|-------|---------|--------|---------|----------|
| 1     | 5004196 | 99542  | 50.145  | 26.117   |
| 2     | 4975273 | 79511  | 49.855  | 30.870   |
| Total | 9979468 | 179053 | 100.000 |          |

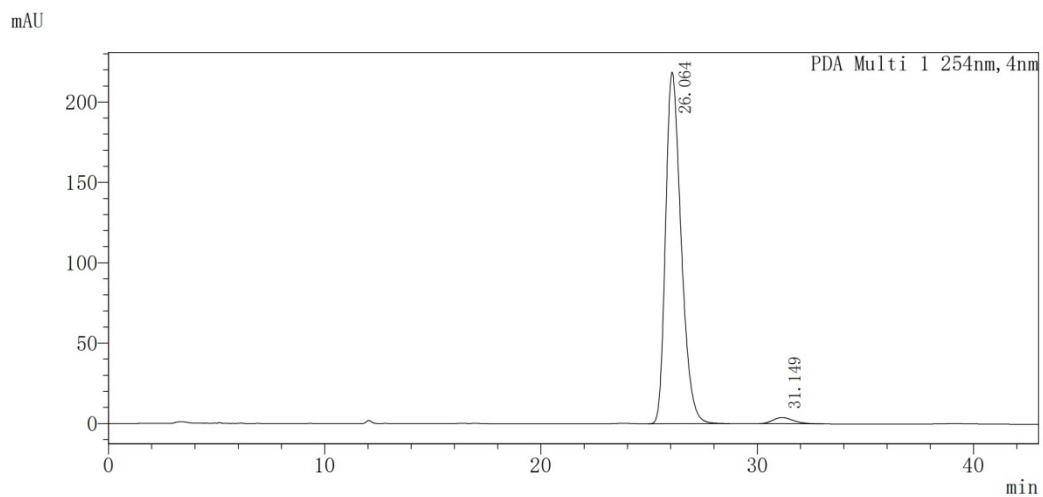

<Peak table>

PDA Ch1 254nm

| Peak  | Area     | Height | Area%   | Ret.time |
|-------|----------|--------|---------|----------|
| 1     | 10941202 | 218741 | 97.753  | 26.064   |
| 2     | 251500   | 3843   | 2.247   | 31.149   |
| Total | 11192702 | 222585 | 100.000 |          |

HPLC chromatogram of compound **3e** (97% *ee*)

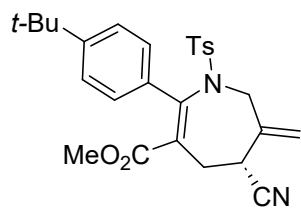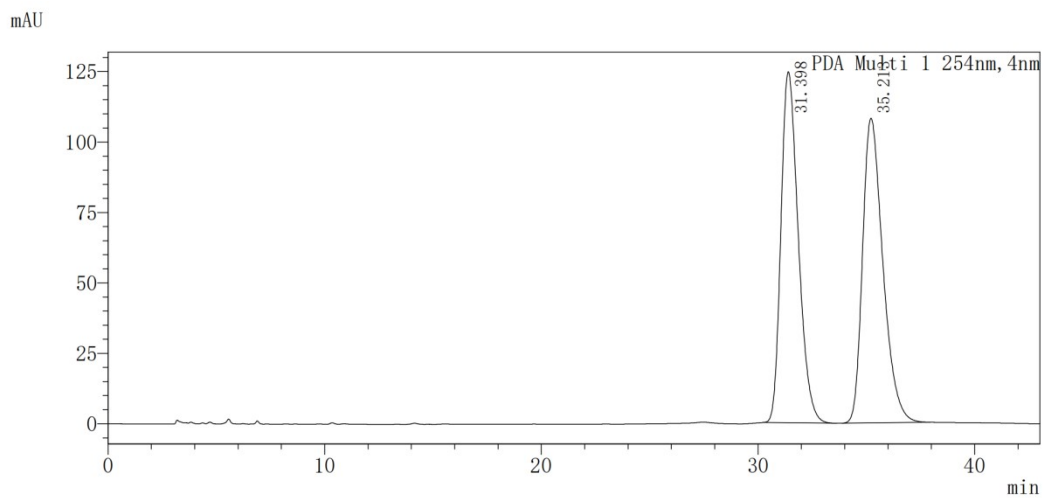

<Peak table>

PDA Ch1 254nm

| Peak  | Area     | Height | Area%   | Ret.time |
|-------|----------|--------|---------|----------|
| 1     | 6924689  | 124554 | 49.516  | 31.398   |
| 2     | 7060013  | 108103 | 50.484  | 35.213   |
| Total | 13984702 | 232657 | 100.000 |          |

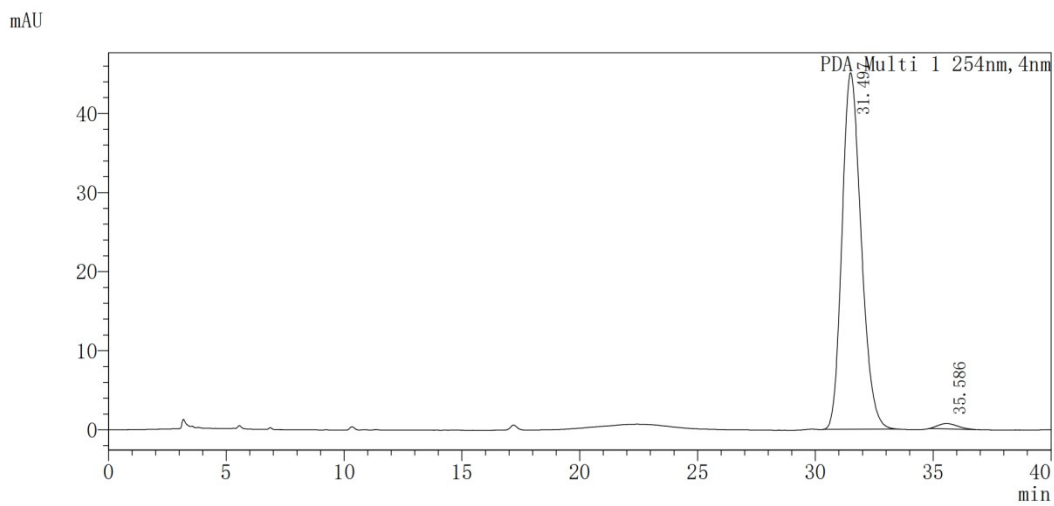

<Peak table>

PDA Ch1 254nm

| Peak  | Area    | Height | Area%   | Ret.time |
|-------|---------|--------|---------|----------|
| 1     | 2550812 | 45080  | 98.499  | 31.497   |
| 2     | 38875   | 676    | 1.501   | 35.586   |
| Total | 2589687 | 45755  | 100.000 |          |



HPLC chromatogram of compound **3f** (97% *ee*)

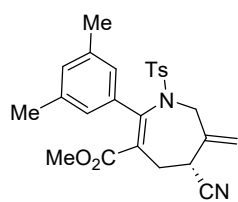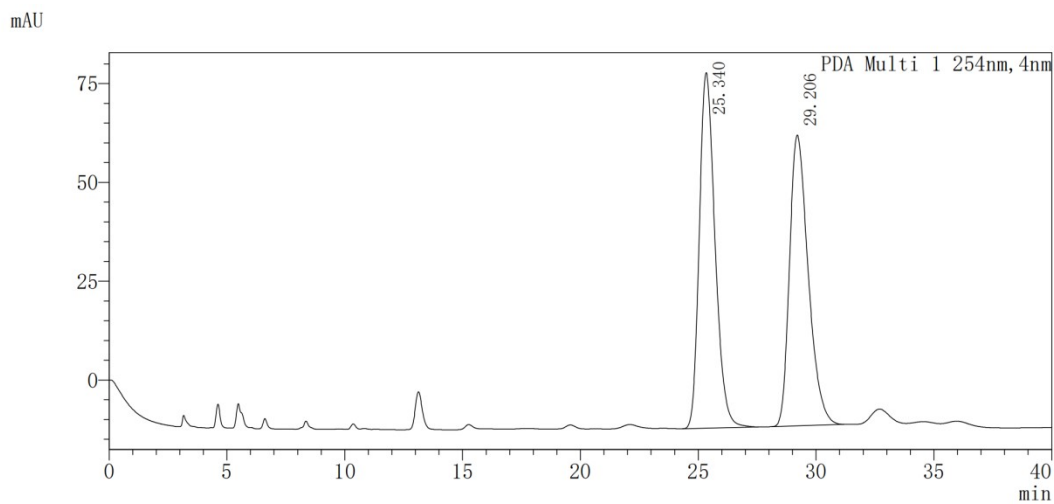

<Peak table>

PDA Ch1 254nm

| Peak  | Area    | Height | Area%   | Ret.time |
|-------|---------|--------|---------|----------|
| 1     | 4168386 | 89947  | 50.665  | 25.340   |
| 2     | 4059007 | 73560  | 49.335  | 29.206   |
| Total | 8227393 | 163507 | 100.000 |          |

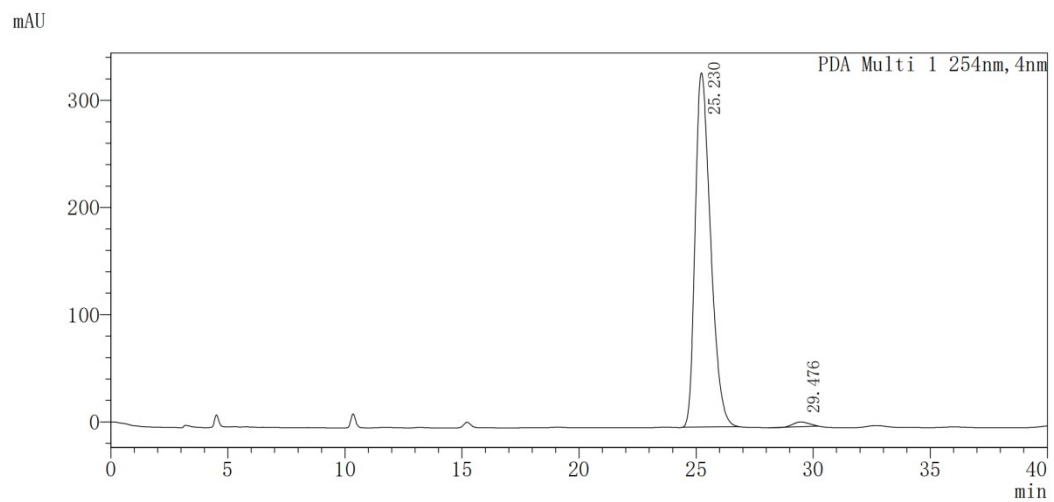

<Peak table>

PDA Ch1 254nm

| Peak  | Area     | Height | Area%   | Ret.time |
|-------|----------|--------|---------|----------|
| 1     | 15125816 | 330444 | 98.742  | 25.230   |
| 2     | 192743   | 4283   | 1.258   | 29.476   |
| Total | 15318559 | 334727 | 100.000 |          |

HPLC chromatogram of compound **3g** (95% *ee*)

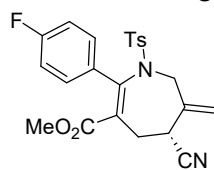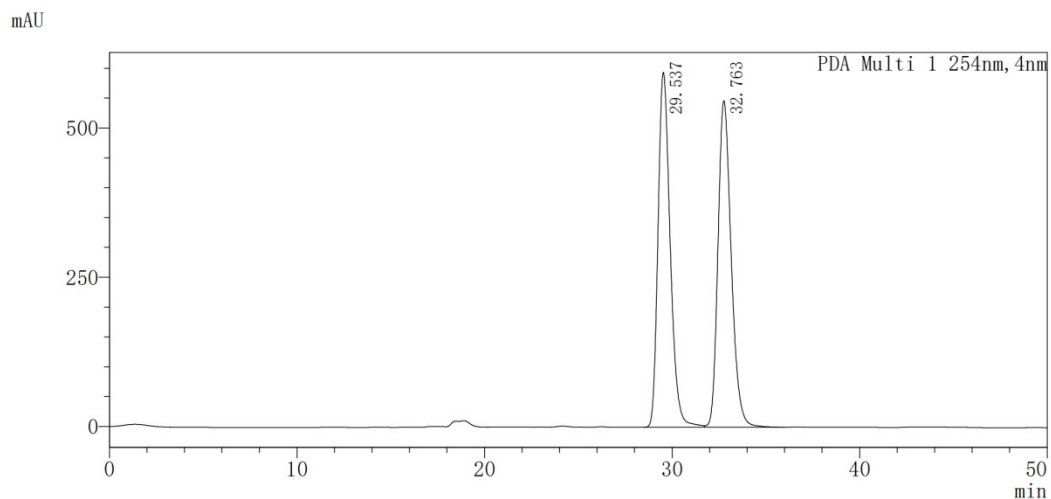

<Peak table>

PDA Ch1 254nm

| Peak  | Area     | Height  | Area%   | Ret.time |
|-------|----------|---------|---------|----------|
| 1     | 26787712 | 594406  | 49.939  | 29.537   |
| 2     | 26853414 | 546997  | 50.061  | 32.763   |
| Total | 53641127 | 1141403 | 100.000 |          |

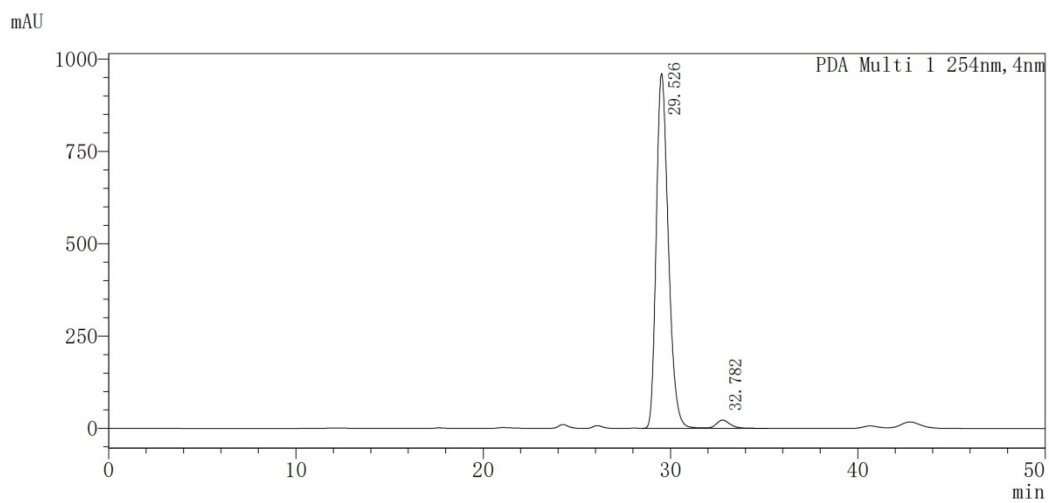

<Peak table>

PDA Ch1 254nm

| Peak  | Area     | Height | Area%   | Ret.time |
|-------|----------|--------|---------|----------|
| 1     | 43110545 | 961119 | 97.375  | 29.526   |
| 2     | 1162067  | 22328  | 2.625   | 32.782   |
| Total | 44272612 | 983447 | 100.000 |          |

HPLC chromatogram of compound **3h** (89% *ee*)

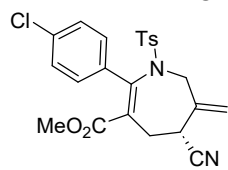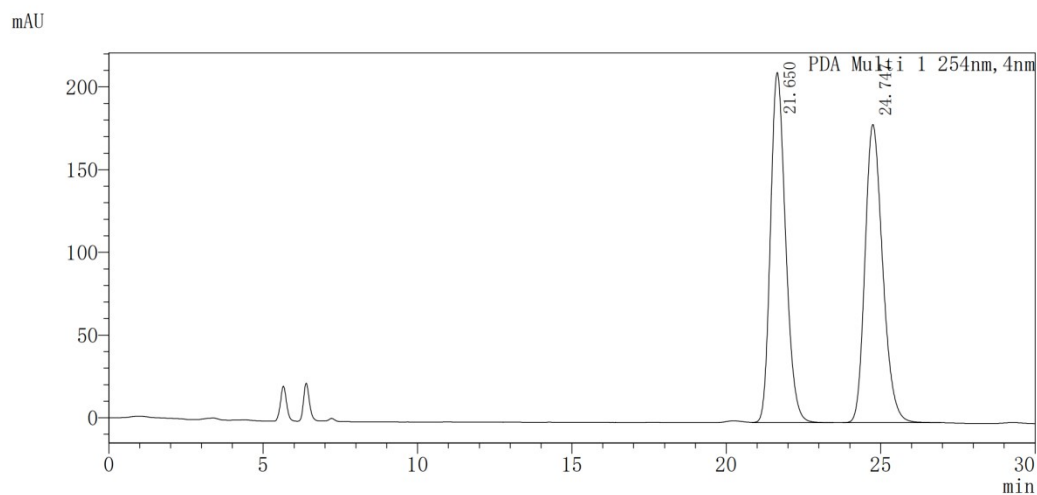

<Peak table>

PDA Ch1 254nm

| Peak  | Area     | Height | Area%   | Ret.time |
|-------|----------|--------|---------|----------|
| 1     | 7215265  | 211670 | 50.108  | 21.650   |
| 2     | 7184163  | 180325 | 49.892  | 24.747   |
| Total | 14399428 | 391995 | 100.000 |          |

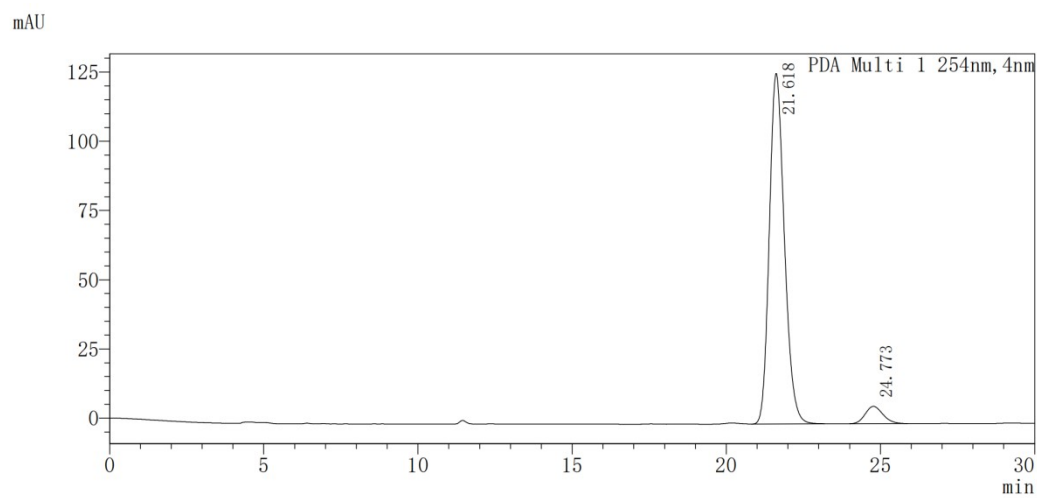

<Peak table>

PDA Ch1 254nm

| Peak  | Area    | Height | Area%   | Ret.time |
|-------|---------|--------|---------|----------|
| 1     | 4296878 | 126615 | 94.517  | 21.618   |
| 2     | 249289  | 6242   | 5.483   | 24.773   |
| Total | 4546167 | 132857 | 100.000 |          |

HPLC chromatogram of compound **3i** (90% *ee*)

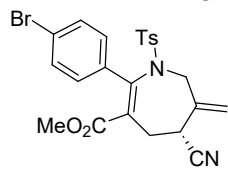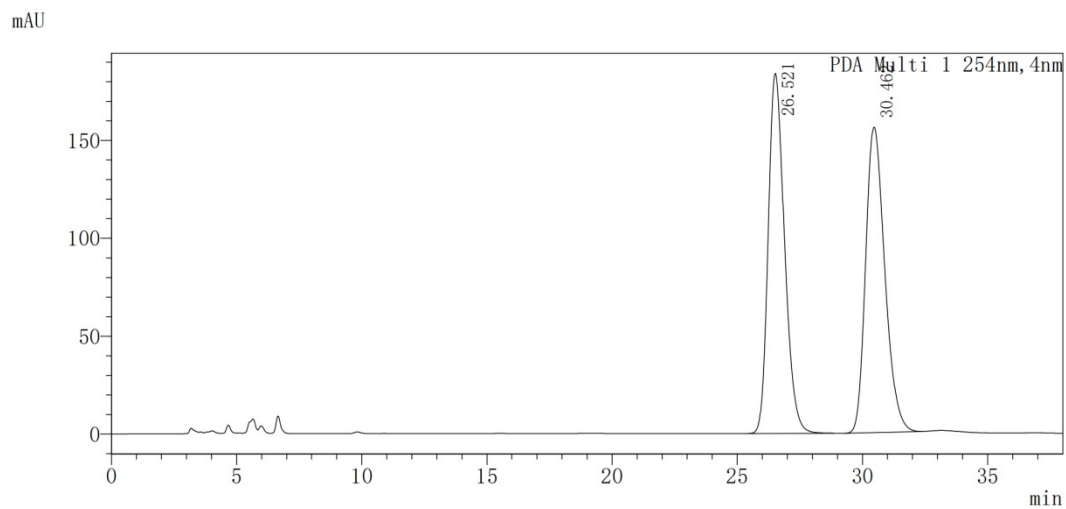

<Peak table>

PDA Ch1 254nm

| Peak  | Area     | Height | Area%   | Ret.time |
|-------|----------|--------|---------|----------|
| 1     | 8353108  | 183994 | 50.133  | 26.521   |
| 2     | 8308848  | 156094 | 49.867  | 30.462   |
| Total | 16661956 | 340088 | 100.000 |          |

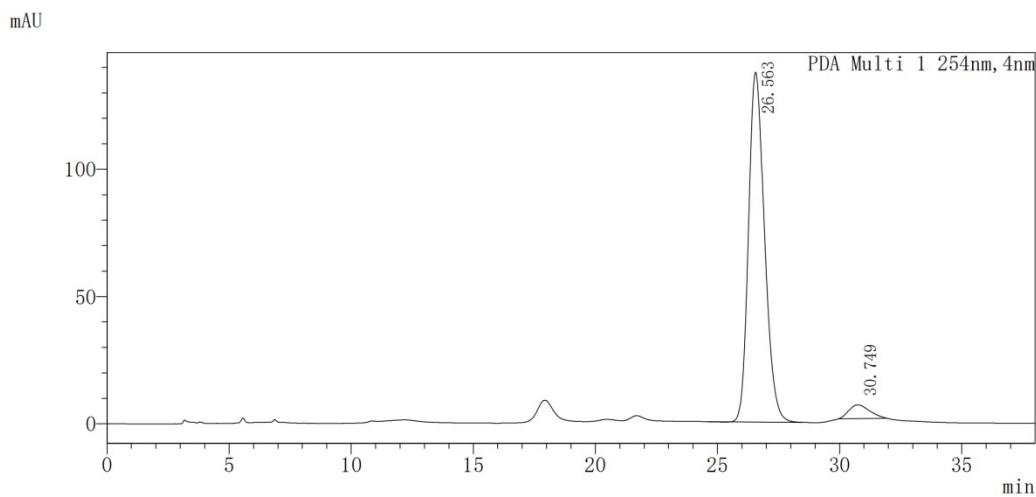

<Peak table>

PDA Ch1 254nm

| Peak  | Area    | Height | Area%   | Ret.time |
|-------|---------|--------|---------|----------|
| 1     | 6287914 | 137437 | 95.169  | 26.563   |
| 2     | 319201  | 5413   | 4.831   | 30.749   |
| Total | 6607115 | 142850 | 100.000 |          |

HPLC chromatogram of compound **3j** (91%*ee*)

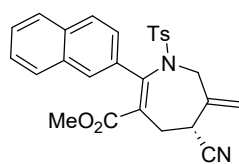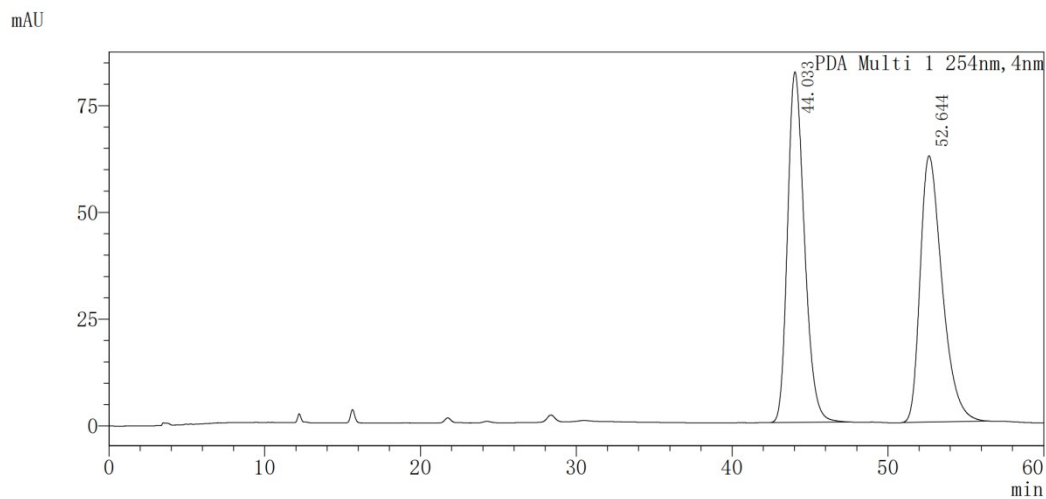

<Peak table>

PDA Ch1 254nm

| Peak  | Area     | Height | Area%   | Ret.time |
|-------|----------|--------|---------|----------|
| 1     | 6175804  | 82052  | 50.295  | 44.033   |
| 2     | 6103423  | 62357  | 49.705  | 52.644   |
| Total | 12279226 | 144409 | 100.000 |          |

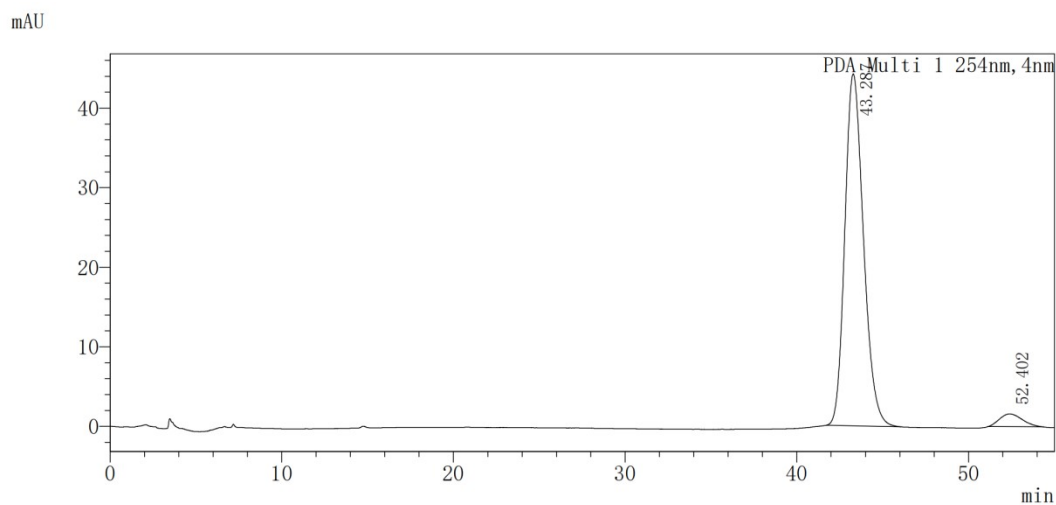

<Peak table>

PDA Ch1 254nm

| Peak  | Area    | Height | Area%   | Ret.time |
|-------|---------|--------|---------|----------|
| 1     | 3336416 | 44236  | 95.730  | 43.287   |
| 2     | 148807  | 1609   | 4.270   | 52.402   |
| Total | 3485223 | 45845  | 100.000 |          |

HPLC chromatogram of compound **3k** (93% *ee*)

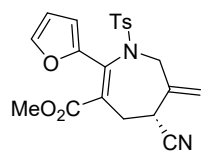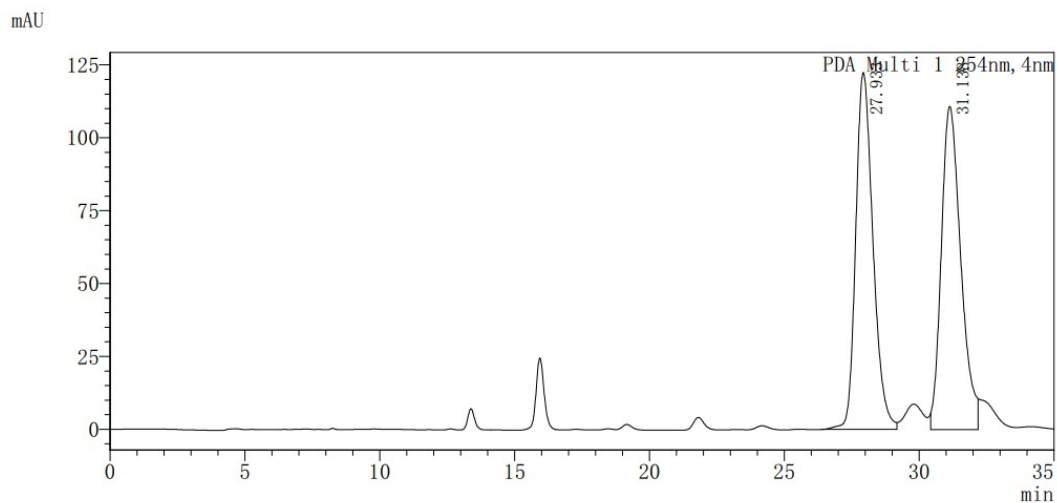

<Peak table>

PDA Ch1 254nm

| Peak  | Area     | Height | Area%   | Ret.time |
|-------|----------|--------|---------|----------|
| 1     | 5452786  | 122446 | 49.493  | 27.933   |
| 2     | 5564440  | 110818 | 50.507  | 31.138   |
| Total | 11017225 | 233264 | 100.000 |          |

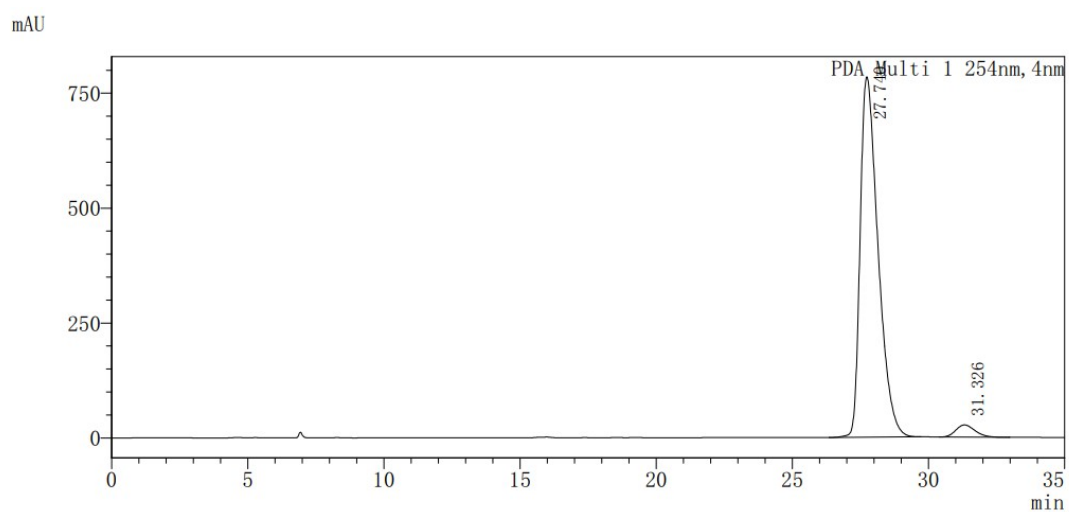

<Peak table>

PDA Ch1 254nm

| Peak  | Area     | Height | Area%   | Ret.time |
|-------|----------|--------|---------|----------|
| 1     | 35789367 | 784140 | 96.449  | 27.740   |
| 2     | 1317756  | 26671  | 3.551   | 31.326   |
| Total | 37107124 | 810811 | 100.000 |          |

HPLC chromatogram of compound **31** (88% *ee*)

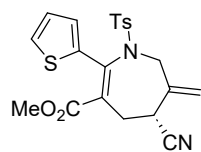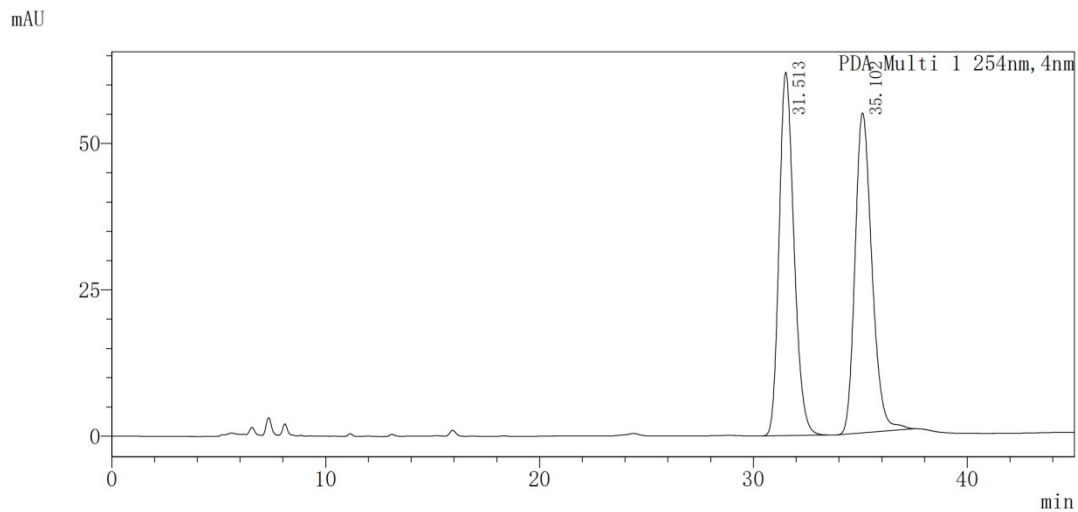

<Peak table>

PDA Ch1 254nm

| Peak  | Area    | Height | Area%   | Ret.time |
|-------|---------|--------|---------|----------|
| 1     | 2991616 | 62059  | 49.900  | 31.513   |
| 2     | 3003574 | 54669  | 50.100  | 35.102   |
| Total | 5995191 | 116728 | 100.000 |          |

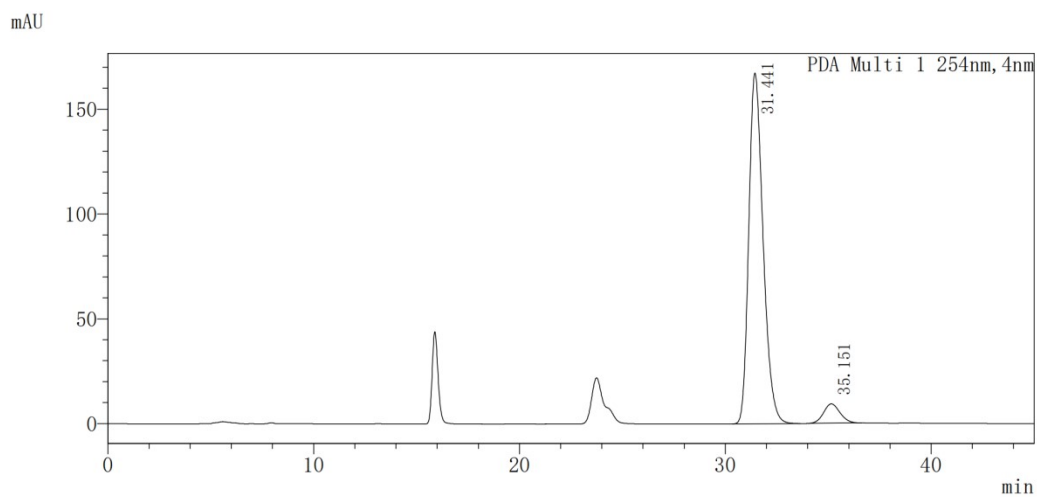

<Peak table>

PDA Ch1 254nm

| Peak  | Area    | Height | Area%   | Ret.time |
|-------|---------|--------|---------|----------|
| 1     | 8076394 | 167325 | 94.039  | 31.441   |
| 2     | 511925  | 9225   | 5.961   | 35.151   |
| Total | 8588319 | 176551 | 100.000 |          |

HPLC chromatogram of compound **3m** (95% *ee*)

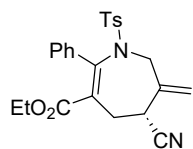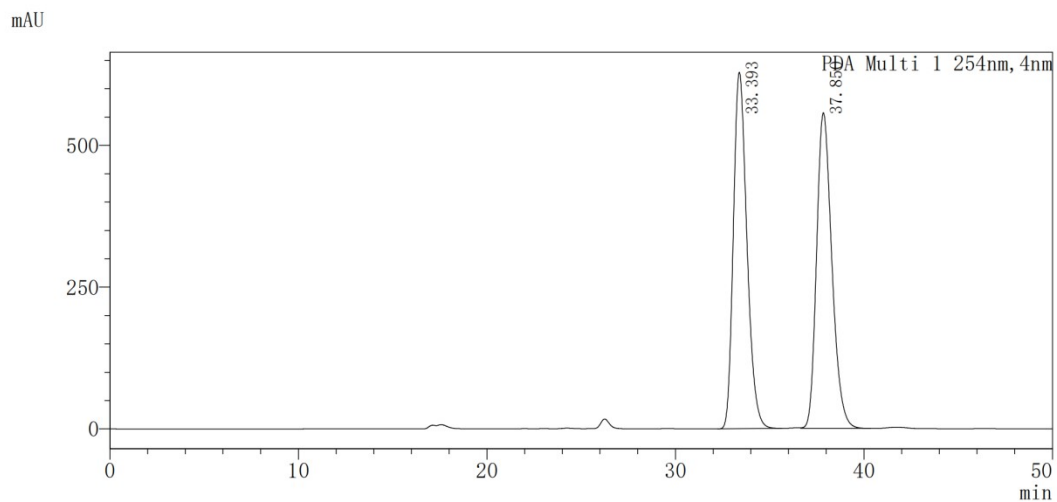

<Peak table>

PDA Ch1 254nm

| Peak  | Area     | Height  | Area%   | Ret.time |
|-------|----------|---------|---------|----------|
| 1     | 31408042 | 628691  | 50.032  | 33.393   |
| 2     | 31367967 | 556576  | 49.968  | 37.850   |
| Total | 62776010 | 1185266 | 100.000 |          |

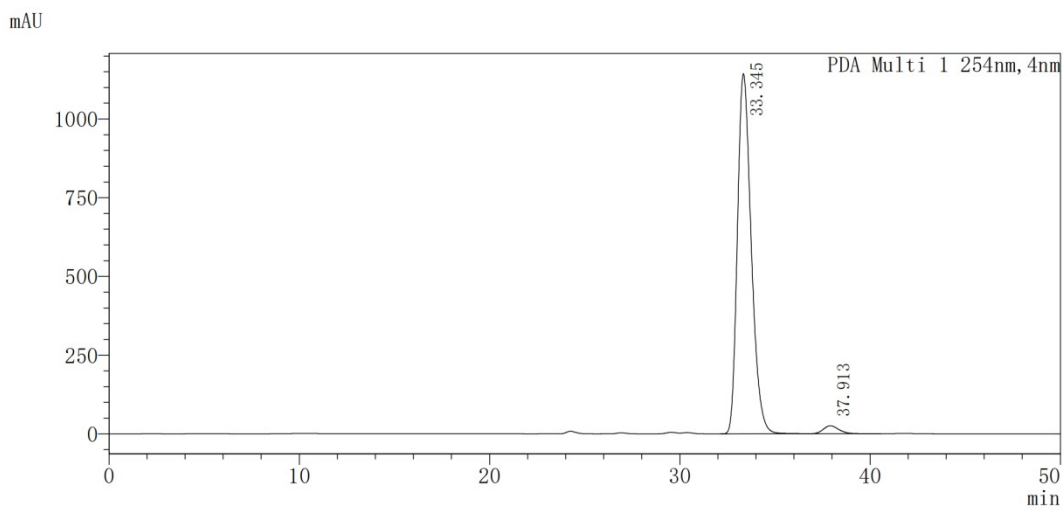

<Peak table>

PDA Ch1 254nm

| Peak  | Area     | Height  | Area%   | Ret.time |
|-------|----------|---------|---------|----------|
| 1     | 57801643 | 1143850 | 97.455  | 33.345   |
| 2     | 1509389  | 25586   | 2.545   | 37.913   |
| Total | 59311032 | 1169436 | 100.000 |          |



HPLC chromatogram of compound **3n** (96% *ee*)

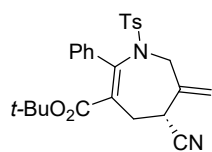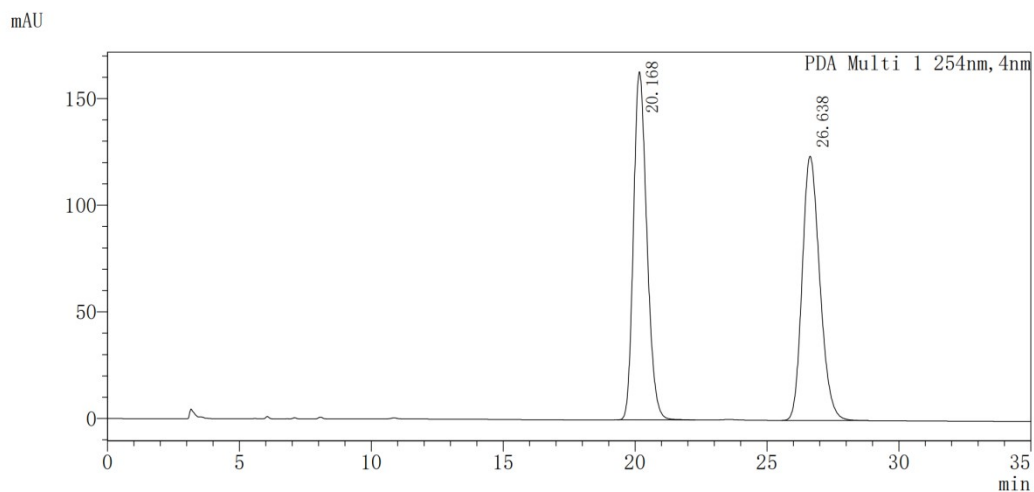

<Peak table>

PDA Ch1 254nm

| Peak  | Area     | Height | Area%   | Ret.time |
|-------|----------|--------|---------|----------|
| 1     | 5767264  | 163230 | 50.052  | 20.168   |
| 2     | 5755194  | 123928 | 49.948  | 26.638   |
| Total | 11522457 | 287158 | 100.000 |          |

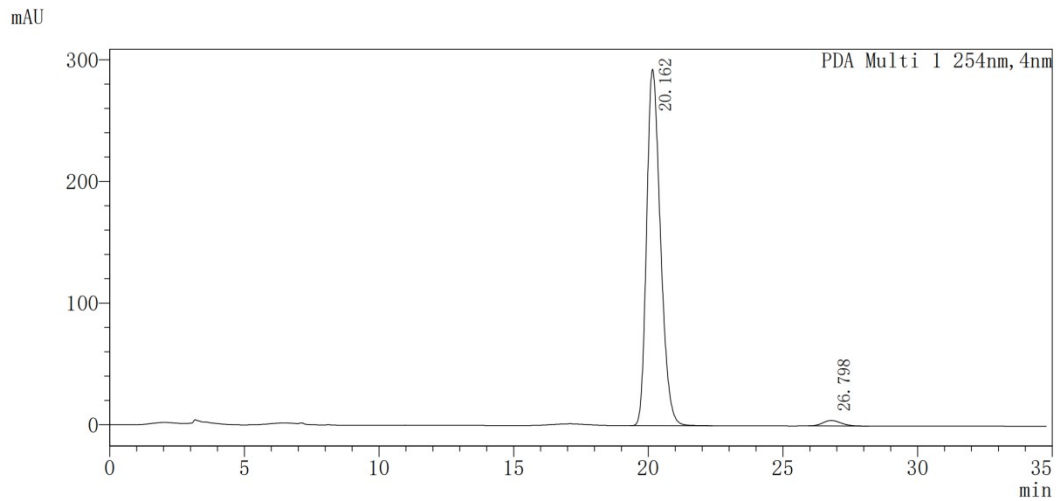

<Peak table>

PDA Ch1 254nm

| Peak  | Area     | Height | Area%   | Ret.time |
|-------|----------|--------|---------|----------|
| 1     | 10442458 | 292770 | 98.032  | 20.162   |
| 2     | 209647   | 4508   | 1.968   | 26.798   |
| Total | 10652105 | 297277 | 100.000 |          |

HPLC chromatogram of compound **3o** (93% *ee*)

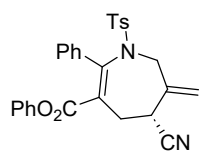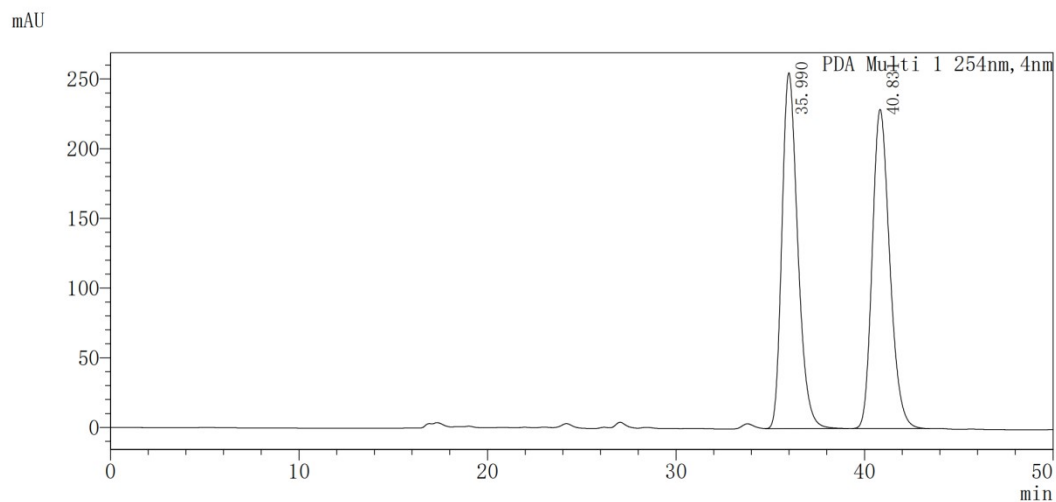

<Peak table>

PDA Ch1 254nm

| Peak  | Area     | Height | Area%   | Ret.time |
|-------|----------|--------|---------|----------|
| 1     | 14911720 | 255465 | 50.257  | 35.990   |
| 2     | 14759444 | 229040 | 49.743  | 40.831   |
| Total | 29671164 | 484505 | 100.000 |          |

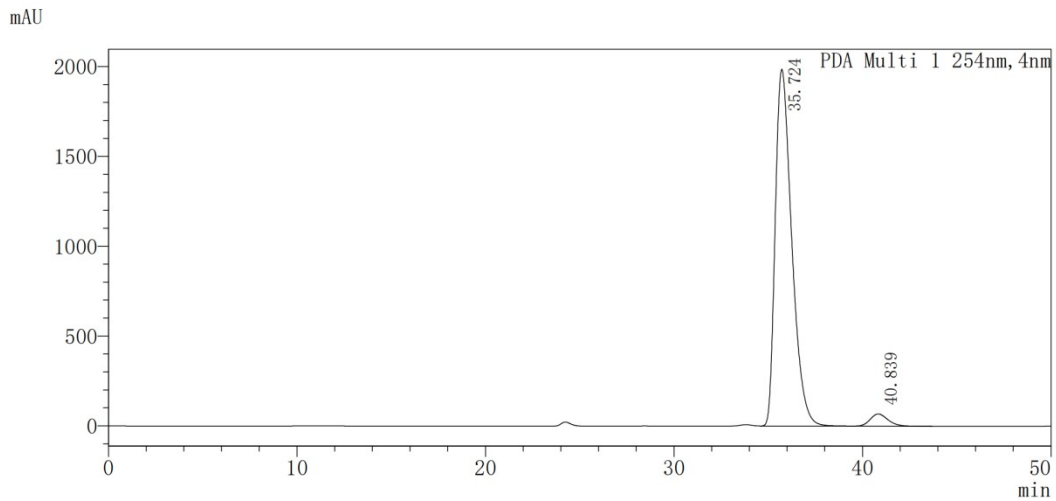

<Peak table>

PDA Ch1 254nm

| Peak  | Area      | Height  | Area%   | Ret.time |
|-------|-----------|---------|---------|----------|
| 1     | 121050572 | 1986875 | 96.397  | 35.724   |
| 2     | 4524054   | 68157   | 3.603   | 40.839   |
| Total | 125574626 | 2055032 | 100.000 |          |

HPLC chromatogram of compound **3p** (93% *ee*)

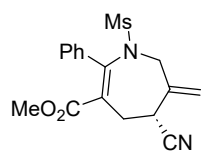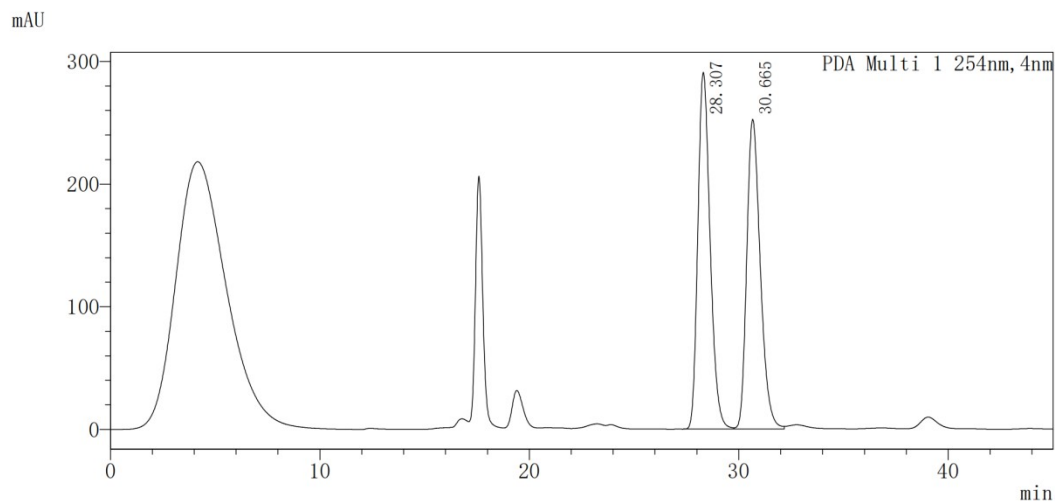

<Peak table>

PDA Ch1 254nm

| Peak  | Area     | Height | Area%   | Ret.time |
|-------|----------|--------|---------|----------|
| 1     | 11832624 | 290916 | 51.056  | 28.307   |
| 2     | 11343265 | 252553 | 48.944  | 30.665   |
| Total | 23175889 | 543469 | 100.000 |          |

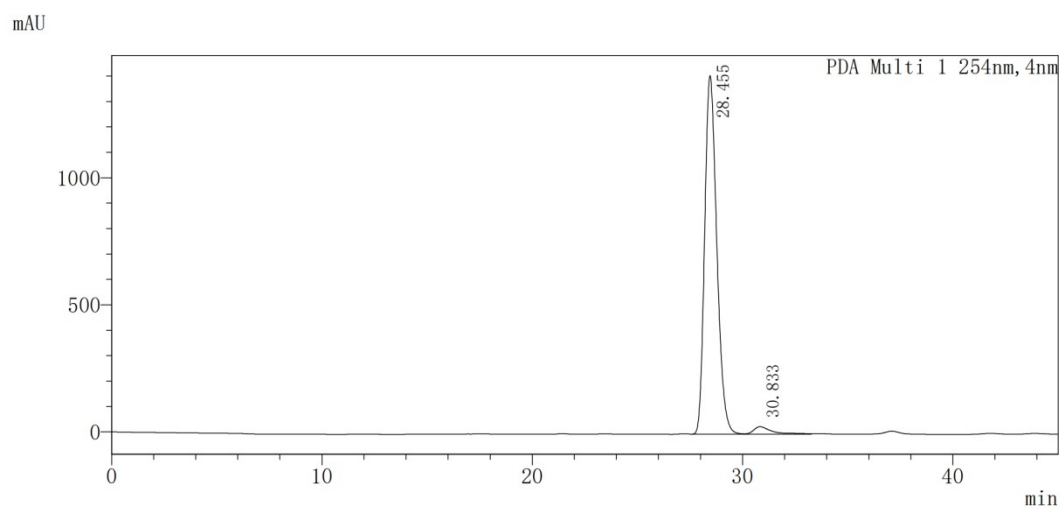

<Peak table>

PDA Ch1 254nm

| Peak  | Area     | Height  | Area%   | Ret.time |
|-------|----------|---------|---------|----------|
| 1     | 56592594 | 1411355 | 96.724  | 28.455   |
| 2     | 1916861  | 30084   | 3.276   | 30.833   |
| Total | 58509455 | 1441439 | 100.000 |          |

HPLC chromatogram of compound **3q** (87% ee)

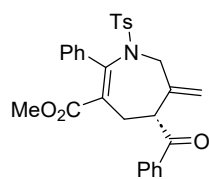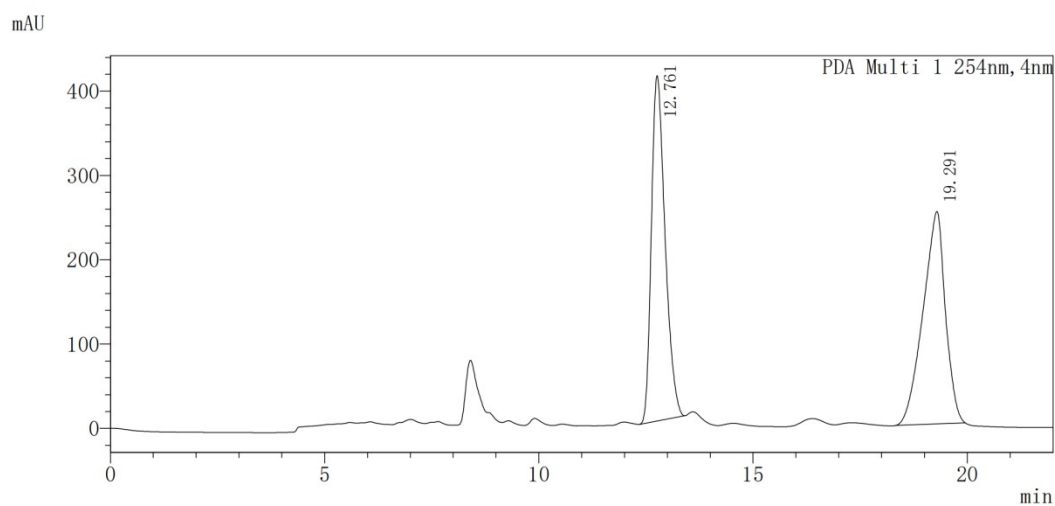

<Peak table>

PDA Ch1 254nm

| Peak  | Area     | Height | Area%   | Ret.time |
|-------|----------|--------|---------|----------|
| 1     | 9109607  | 409499 | 49.885  | 12.761   |
| 2     | 9151476  | 251812 | 50.115  | 19.291   |
| Total | 18261084 | 661311 | 100.000 |          |

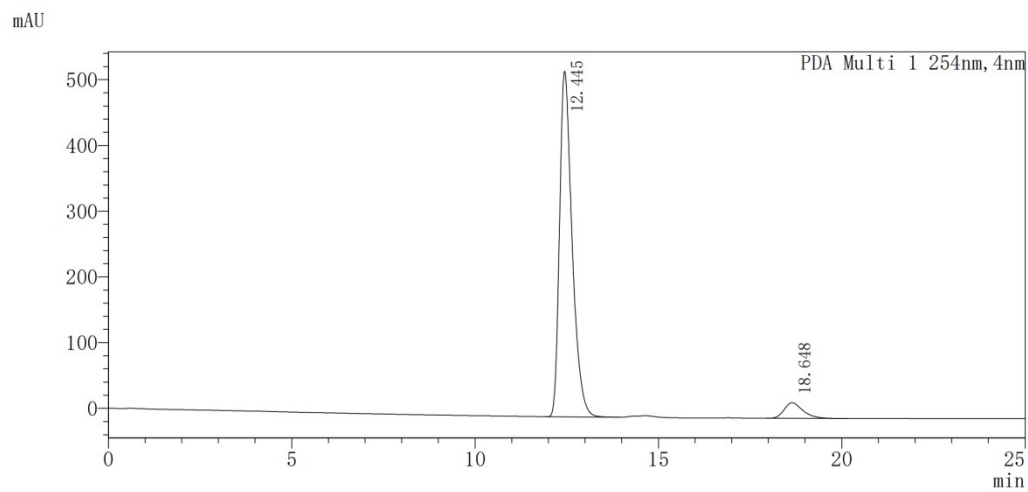

<Peak table>

PDA Ch1 254nm

| Peak  | Area     | Height | Area%   | Ret.time |
|-------|----------|--------|---------|----------|
| 1     | 12527993 | 525711 | 93.666  | 12.445   |
| 2     | 847125   | 23840  | 6.334   | 18.648   |
| Total | 13375117 | 549551 | 100.000 |          |

HPLC chromatogram of compound **3r** (87% *ee*)

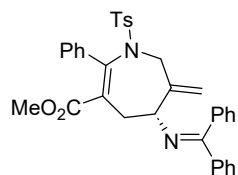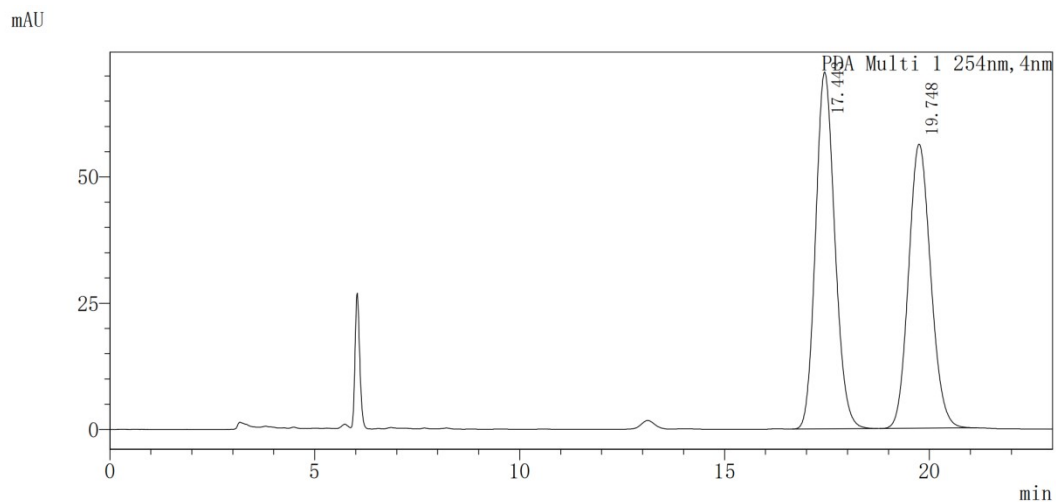

<Peak table>

PDA Ch1 254nm

| Peak  | Area    | Height | Area%   | Ret.time |
|-------|---------|--------|---------|----------|
| 1     | 2312183 | 70643  | 52.203  | 17.443   |
| 2     | 2117003 | 56249  | 47.797  | 19.748   |
| Total | 4429185 | 126892 | 100.000 |          |

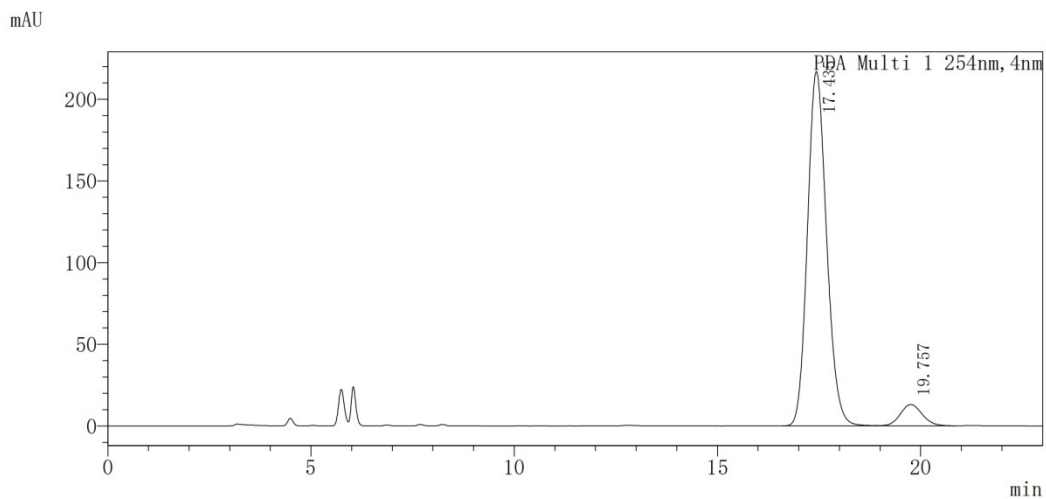

<Peak table>

PDA Ch1 254nm

| Peak  | Area    | Height | Area%   | Ret.time |
|-------|---------|--------|---------|----------|
| 1     | 7102925 | 216857 | 93.564  | 17.435   |
| 2     | 488601  | 13053  | 6.436   | 19.757   |
| Total | 7591527 | 229910 | 100.000 |          |

HPLC chromatogram of compound **3s** (84% *ee*)

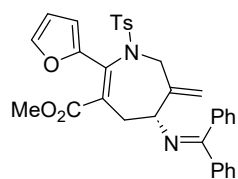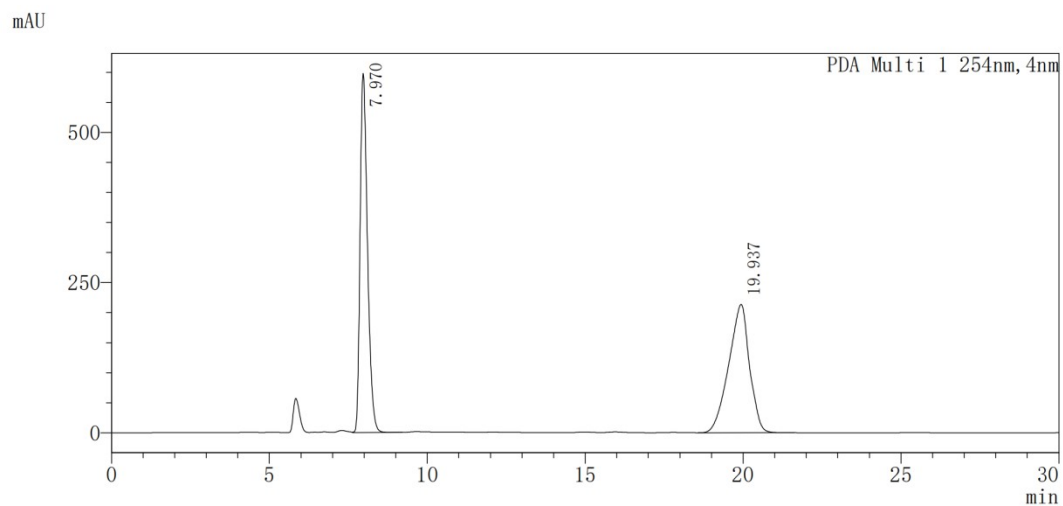

<Peak table>

PDA Ch1 254nm

| Peak  | Area     | Height | Area%   | Ret.time |
|-------|----------|--------|---------|----------|
| 1     | 9720461  | 597797 | 49.835  | 7.970    |
| 2     | 9784982  | 213692 | 50.165  | 19.937   |
| Total | 19505443 | 811489 | 100.000 |          |

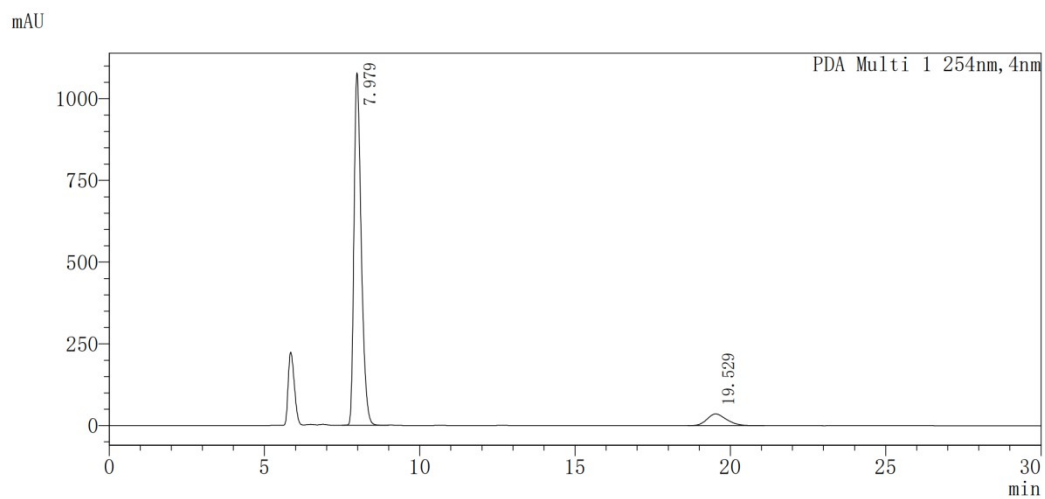

<Peak table>

PDA Ch1 254nm

| Peak  | Area     | Height  | Area%   | Ret.time |
|-------|----------|---------|---------|----------|
| 1     | 17502582 | 1078114 | 91.871  | 7.979    |
| 2     | 1548610  | 35698   | 8.129   | 19.529   |
| Total | 19051192 | 1113812 | 100.000 |          |

HPLC chromatogram of compound **4** (88% *ee*)

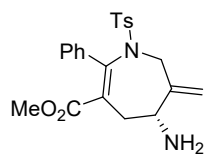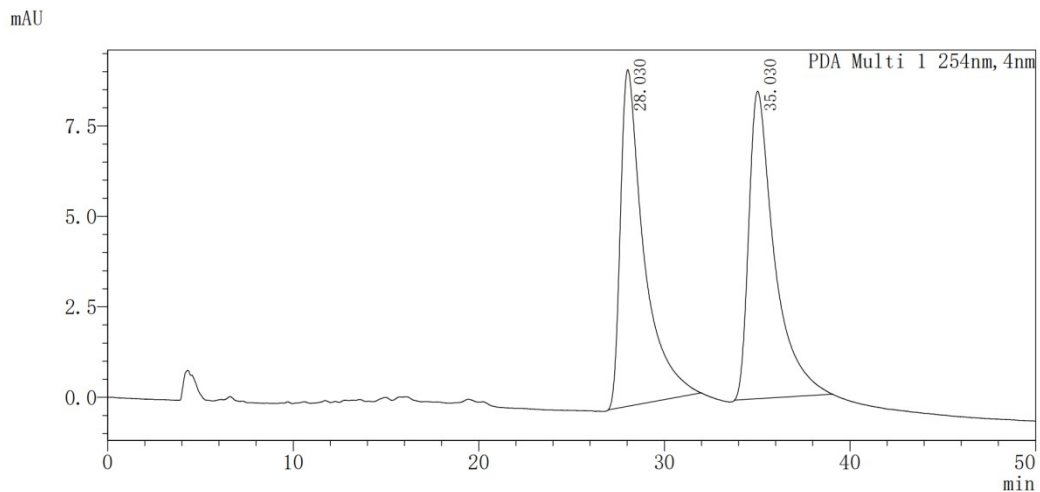

<Peak table>

PDA Ch1 254nm

| Peak  | Area    | Height | Area%   | Ret.time |
|-------|---------|--------|---------|----------|
| 1     | 818749  | 9299   | 49.987  | 28.030   |
| 2     | 819184  | 8499   | 50.013  | 35.030   |
| Total | 1637934 | 17798  | 100.000 |          |

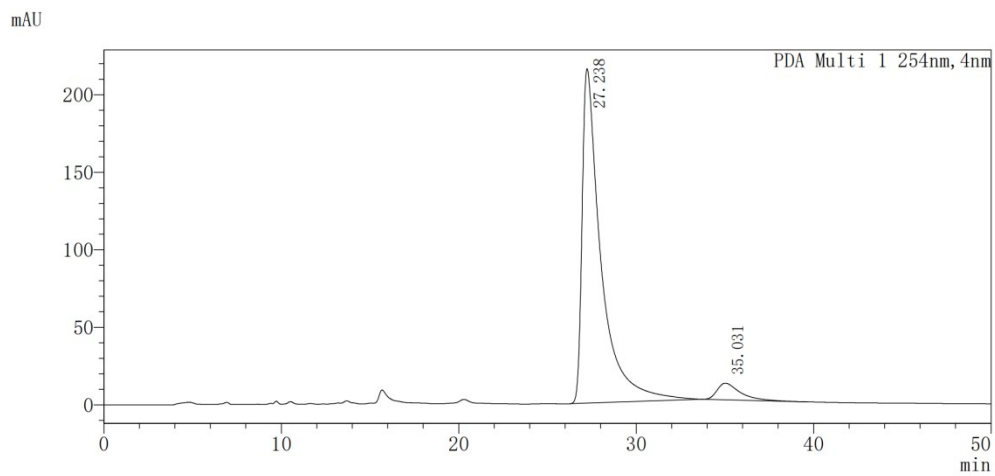

<Peak table>

PDA Ch1 254nm

| Peak  | Area     | Height | Area%   | Ret.time |
|-------|----------|--------|---------|----------|
| 1     | 15999562 | 215743 | 94.190  | 27.238   |
| 2     | 986991   | 10793  | 5.810   | 35.031   |
| Total | 16986552 | 226537 | 100.000 |          |
